# Supplementary material
Source: publisher figshare collection journal article supplement (https://acs.figshare.com/ndownloader/files/3955159)
Supplement: Supplementary file 1 [file 3955159]

## Sheet: conventional oxidation buffer
Position	Known Site	Protein	Protein Descriptions	Uniprot	Sequence Window	Modified Sequence
171	Glycosylation	IPI00108041	Stromal interaction molecule 1;Stromal interaction molecule 1, isoform CRA_a	P70302;Q3TUX9;Q8K1E1	PRLAVTNTTMTGT	_LAVTN(de)TTM(ox)TGTVLK_
289	Glycosylation	IPI00108811	Glucosylceramidase	P17439	LGPALANSSHDVK	_DLGPALAN(de)SSHDVK_
84	Glycosylation	IPI00108844	Cation-dependent mannose-6-phosphate receptor;ORF 2 protein	P24668;Q3UF03;Q3UKQ5;A2NWD6	VCREASNHSSGAG	_EASN(de)HSSGAGLVQINK_
108	Glycosylation	IPI00108844	Cation-dependent mannose-6-phosphate receptor	P24668;Q3UF03;Q3UKQ5	TVVGRINETHIFN	_IN(de)ETHIFN(de)GSNWIM(ox)LIYK_
114	Glycosylation	IPI00108844	Cation-dependent mannose-6-phosphate receptor	P24668;Q3UF03;Q3UKQ5	NETHIFNGSNWIM	_IN(de)ETHIFN(de)GSNWIM(ox)LIYK_
585		IPI00109108	Putative uncharacterized protein	P46978;Q3TG02;Q3TUR1;Q3TVN9;Q3U547;Q3U573;Q3U9H4;Q3UA28;Q5U412;Q8BMP9;Q8BWT4	QITAMANRTILVD	_VM(ox)SWWDYGYQITAM(ox)AN(de)R_
957	Glycosylation	IPI00110264	Receptor-type tyrosine-protein phosphatase F;Protein tyrosine phosphatase, receptor type, F	A2A8L5;A2A8M1	SQLELQNVTNDTH	_DINSQLELQN(de)VTNDTHLTLLGLKPDTTYDIK_
960	Glycosylation	IPI00110264	Receptor-type tyrosine-protein phosphatase F;Protein tyrosine phosphatase, receptor type, F	A2A8L5;A2A8M1	ELQNVTNDTHLTL	_DINSQLELQN(de)VTNDTHLTLLGLKPDTTYDIK_
721	Glycosylation	IPI00110264	Receptor-type tyrosine-protein phosphatase F;Protein tyrosine phosphatase, receptor type, F	A2A8L5;A2A8M1	VEVEPLNSTAVHV	_KVEVEPLN(de)STAVHVSWK_
110	Glycosylation	IPI00110805	H-2 class I histocompatibility antigen, D-D alpha chain;Isoform 1 of H-2 class I histocompatibility antigen, alpha chain (Fragment);Isoform 2 of H-2 class I histocompatibility antigen, alpha chain (Fragment)	P01900;P01895-1;P01895;P01895-2;Q31154	TALRYYNQSAGGS	_YYN(de)QSAGGSHTLQWM(ox)AGCDVESDGR_
191	Glycosylation	IPI00110852	Translocon-associated protein alpha, muscle specific isoform;Translocon-associated protein subunit alpha;similar to translocon-associated protein alpha, muscle specific	Q52PE3;Q9CY50;A8C1W9;Q3TV94	FQDAVFNQTVTVI	_DLN(de)GNVFQDAVFN(de)QTVTVIER_
136	Glycosylation	IPI00110852	Translocon-associated protein alpha, muscle specific isoform;Translocon-associated protein subunit alpha;similar to translocon-associated protein alpha, muscle specific	Q52PE3;Q9CY50;A8C1W9;Q3TV94	YQFYIQNFTALPL	_YPQDYQFYIQN(de)FTALPLNTVVPPQR_
261	Glycosylation	IPI00404551	Putative uncharacterized protein;Cathepsin D;Putative uncharacterized protein;Protein	Q8C243;P18242;Q05BF3;Q3TIR0;Q3TJN3;Q3TWD0;Q3TWL1;Q3TWR6;Q3TXL5;Q3U651;Q3U7I9;Q3U7P0;Q3U8W5;Q3UAQ1;Q3UC89;Q3UCD9;Q8VCK2;Q3UCW4	GELSYLNVTRKAY	_YYHGELSYLN(de)VTR_
329	Glycosylation	IPI00111163	Ectonucleotide pyrophosphatase/phosphodiesterase family member 5;Enpp5 protein (Fragment)	Q9EQG7;Q5DTL0;Q5FWJ8	GWYILQNKSDDFL	_VQPIVAVADEGWYILQN(de)K_
427	Glycosylation	IPI00111794	Isoform 1 of Sialate O-acetylesterase;Isoform 2 of Sialate O-acetylesterase	P70665-1;P70665;C3VDI9;C3VDJ0;P70665-2	VAYGEKNLTFQGP	_AVAYGEKN(de)LTFQGPLPK_
470	Glycosylation	IPI00111960	Lysosomal alpha-glucosidase;Glucosidase, alpha, acid	P70699;A2AFL4;A2AFL5	RGVFITNETGQPL	_RGVFITN(de)ETGQPLIGK_
140	Glycosylation	IPI00111960	Lysosomal alpha-glucosidase;Glucosidase, alpha, acid	P70699;A2AFL4;A2AFL3	PSYRLENLSSTES	_LEN(de)LSSTESGYTATLTR_
327		IPI00112322	Putative uncharacterized protein;UDP-glucuronosyltransferase 2B5;MCG131371	Q3UWB9;P17717;Q8K169;Q91WH2	LGSMVSNMTEEKA	_DM(ox)EEFVQSSGDHGVVVFSLGSM(ox)VSN(de)M(ox)TEEK_
151	Glycosylation	IPI00889843	ATP-binding cassette 1, sub-family A, member 1;ATP-binding cassette sub-family A member 1	B1AWZ8;Q8BPY1;P41233	QDFLVDNETFSGF	_LQDFLVDN(de)ETFSGFLQHN(de)LSLPR_
161	Glycosylation	IPI00889843	ATP-binding cassette 1, sub-family A, member 1;ATP-binding cassette sub-family A member 1	B1AWZ8;Q8BPY1;P41233	SGFLQHNLSLPRS	_LQDFLVDN(de)ETFSGFLQHN(de)LSLPR_
396	Glycosylation	IPI00113057	Plasma kallikrein;plasma kallikrein B1 precursor	P26262;Q8R0P5	RIVGGTNASLGEW	_IVGGTN(de)ASLGEWPWQVSLQVK_
528	Glycosylation	IPI00113539	Fibronectin;Putative uncharacterized protein;Putative uncharacterized protein	P11276;Q3UGY5;Q3UHR1;Q3UZF9;B9EHT6;Q3UH17;Q3UHL6;Q8R3F3;Q9Z1Z8;B7ZNJ1;Q3TBB4;Q3TCF1;Q3TCL7;Q99KD0;Q9Z1Z7	DITYNVNDTFHKR	_DQCIVDDITYNVN(de)DTFHK_
1006	Glycosylation	IPI00113539	Fibronectin;Putative uncharacterized protein;Putative uncharacterized protein	P11276;Q3UGY5;Q3UHR1;Q3UZF9;B9EHT6;Q3UH17;Q3UHL6;Q8R3F3;Q9Z1Z8;B7ZNJ1;Q3TBB4;Q3TCF1;Q3TCL7;Q99KD0;Q9Z1Z7	TNLQFVNETDRTV	_LDAPTNLQFVN(de)ETDR_
542	Glycosylation	IPI00113539	Fibronectin;Putative uncharacterized protein;Putative uncharacterized protein	P11276;Q3UGY5;Q3UHR1;Q3UZF9;B9EHT6;Q3UH17;Q3UHL6;Q8R3F3;Q9Z1Z8;B7ZNJ1;Q3TBB4;Q3TCF1;Q3TCL7;Q99KD0;Q9Z1Z7	EEGHMLNCTCFGQ	_RHEEGHM(ox)LN(de)CTCFGQGR_
290	Glycosylation	IPI00113750	Vitamin K-dependent protein C	P33587	EILVHPNYTRSSS	_EILVHPN(de)YTR_
554	Glycosylation	IPI00515360	perlecan;similar to perlecan;Basement membrane-specific heparan sulfate proteoglycan core protein	B1B0C7;Q2XQV0;Q3UHH3;Q52KG8;Q5RKM8;Q05793	NDFKGVNVTMPSQ	_GVN(de)VTM(ox)PSQPGVPPLSSTQLQIDPALQEFQLVDLSR_
1129	Glycosylation	IPI00929892	mannosidase 2, alpha 1;Alpha-mannosidase 2	B9EHS6;Q8C4L1;P27046	SPPDAQNMSEVSL	_FAVESLVPSSLSLM(ox)HSPPDAQN(de)M(ox)SEVSLSPM(ox)EISTFR_
93	Glycosylation	IPI00929892	mannosidase 2, alpha 1;Alpha-mannosidase 2	B9EHS6;Q8C4L1;P27046	PRGSPGNASQGSI	_GSPGN(de)ASQGSIHLHSPQLALQADPR_
122	Glycosylation	IPI00114206	Prothrombin (Fragment)	P19221;A2AGT7;Q3TJ94	NYLGTVNVTHTGI	_CAM(ox)DLGVNYLGTVN(de)VTHTGIQCQLWR_
144	Glycosylation	IPI00114206	Prothrombin (Fragment)	P19221;A2AGT7;Q3TJ94	PHKPEINSTTHPG	_YPHKPEIN(de)STTHPGADLK_
121	Glycosylation	IPI00114319	Extracellular superoxide dismutase [Cu-Zn]	O09164;O88592;Q3UM12;Q542X9;Q64466	GFPAEQNASNRAI	_LEAYFSLEGFPAEQN(de)ASNR_
168	Glycosylation	IPI00114958	Isoform HMW of Kininogen-1;Isoform 3 of Kininogen-1;51 kDa protein;Isoform LMW of Kininogen-1;15 kDa protein	O08677-1;O08677;O08677-3;O08677-2	SIEHFNNNTDHSH	_HSIEHFNN(de)NTDHSHLFTLR_
160	Glycosylation	IPI00115458	Tubulointerstitial nephritis antigen-like;Lcn7 protein	Q99JR5;A3KFW2;Q4FJX7	YGWQAGNHSAFWG	_GNYGWQAGN(de)HSAFWGM(ox)TLDEGIR_
5	Glycosylation	IPI00115482	Sodium/bile acid cotransporter;Sodium-taurocholate cotransporting polypeptide (Fragment)	O08705;O35940;Q91XS4	__MEAHNVSAPFN	_(ac)M(ox)EAHN(de)VSAPFN(de)FSLPPGFGHR_
11	Glycosylation	IPI00115482	Sodium/bile acid cotransporter;Sodium-taurocholate cotransporting polypeptide (Fragment)	O08705;O35940;Q91XS4	NVSAPFNFSLPPG	_(ac)M(ox)EAHN(de)VSAPFN(de)FSLPPGFGHR_
162	Glycosylation	IPI00115599	Corticosteroid 11-beta-dehydrogenase isozyme 1;Putative uncharacterized protein;25 kDa protein	P50172;Q4JHD9;Q3TJI8	PMLKQSNGSIAVI	_QSN(de)GSIAVISSLAGK_
171	Glycosylation	IPI00115626	Lipid phosphate phosphohydrolase 3	Q99JY8;B1ASM1	PDFSQINCSEGYI	_LRPHFLSVCDPDFSQIN(de)CSEGYIQNYR_
60	Glycosylation	IPI00115736	T-cell surface glycoprotein CD1d2;T-cell surface glycoprotein CD1d1	P11610;Q6PG97;Q80XA2;P11609	QTHRWSNDSATIS	_WSN(de)DSATISFTKPWSQGK_
678	Glycosylation	IPI00115976	Integrin alpha-5;integrin alpha 5 preproprotein	P11688;Q3U7M6;Q80YP5	GDKNALNLTFHAQ	_NALN(de)LTFHAQNLGEGGAYEAELR_
320	Glycosylation	IPI00116105	Corticosteroid-binding globulin;23 kDa protein	Q06770;Q3UKW1	IKDLFTNQSDFAD	_DLFTN(de)QSDFADTTK_
89	Glycosylation	IPI00116105	Corticosteroid-binding globulin;Serine (Or cysteine) peptidase inhibitor, clade A, member 6	Q06770;Q3UKW1;Q91WQ0	LENLGFNMSKMSE	_GSTQYLENLGFN(de)M(ox)SK_
232	Glycosylation	IPI00116105	Corticosteroid-binding globulin;Serine (Or cysteine) peptidase inhibitor, clade A, member 6	Q06770;Q3UKW1;Q91WQ0	MMVQSGNISYFRD	_VPM(ox)M(ox)VQSGN(de)ISYFR_
383	Glycosylation	IPI00116921	Scavenger receptor class B member 1;56 kDa protein;19 kDa protein	Q61009;Q3TZ42;Q4FK30	VTGIPMNCSVKMQ	_EHSLFLDIHPVTGIPM(ox)N(de)CSVK_
138	Glycosylation	IPI00605187	ceruloplasmin isoform a;Putative uncharacterized protein;Ceruloplasmin	Q2F3J4;Q8BV37;Q8BU82;Q61147	GAVYPDNTTDFQR	_EYEGAVYPDN(de)TTDFQR_
104	Glycosylation	IPI00118130	Alpha-1-acid glycoprotein 1	Q60590;Q60839;Q61613;Q91X23	LGFQRENGTFSKY	_EN(de)GTFSKYEGGVETFAHLIVLR_
94	Glycosylation	IPI00118130	Alpha-1-acid glycoprotein 1	Q60590;Q60839;Q61613;Q91X23	GDQCVYNSTHLGF	_ESQTIGDQCVYN(de)STHLGFQR_
173	Glycosylation	IPI00122122	Complement component C8 gamma chain;Complement component 8, gamma subunit, isoform CRA_b	Q8VCG4;A2AJ34;Q9DAC2	RRVREANLTEDQI	_EAN(de)LTEDQILFFPK_
611	Glycosylation	IPI00118674	Nicastrin;nicastrin precursor	P57716;Q3T9E5;Q3TD54;Q3TDE4;Q3TV74;Q6ZQF2	QGPWNSNRTERLP	_DLYEYSWVQGPWNSN(de)R_
54	Glycosylation	IPI00118674	Nicastrin;nicastrin precursor	P57716;Q3T9E5;Q3TD54;Q3TDE4;Q3TV74;Q6ZQF2	PCVRLLNATHQIG	_LLN(de)ATHQIGCQSSISGDTGVIHVVEKEEDLK_
449	Glycosylation	IPI00119019	coagulation factor XI precursor;Coagulation factor XI	Q9DAT3;Q91Y47	VYGGIVNQSEINE	_VYGGIVN(de)QSEINEGTAFFR_
1646	Glycosylation	IPI00119063	Prolow-density lipoprotein receptor-related protein 1	Q91ZX7;Q3U454;Q811K6;Q8C4T5	IKRAFINGTGVET	_AFIN(de)GTGVETVVSADLPNAHGLAVDWVSR_
1512	Glycosylation	IPI00119063	Prolow-density lipoprotein receptor-related protein 1	Q91ZX7;Q3U454;Q811K6;Q8C4T5	NKWTGHNVTVVQR	_WTGHN(de)VTVVQR_
447	Glycosylation	IPI00119063	Prolow-density lipoprotein receptor-related protein 1;Putative uncharacterized protein	Q91ZX7;Q3U454;Q811K6;Q8C4T5;Q3U5J2	IRVNRFNSTEYQV	_VN(de)RFNSTEYQVVTR_
1559	Glycosylation	IPI00119063	Prolow-density lipoprotein receptor-related protein 1	Q91ZX7;Q3U454;Q811K6;Q8C4T5	LCLINYNRTVSCA	_GPCSHLCLIN(de)YNR_
3954	Glycosylation	IPI00119063	Prolow-density lipoprotein receptor-related protein 1	Q91ZX7;Q3U454;Q811K6;Q8C4T5	RGVTHLNISGLKM	_GVTHLN(de)ISGLK_
3049	Glycosylation	IPI00119063	Prolow-density lipoprotein receptor-related protein 1	Q91ZX7;Q3U454;Q811K6;Q8C4T5	LNLDGSNYTLLKQ	_LNLDGSN(de)YTLLK_
1724	Glycosylation	IPI00119063	Prolow-density lipoprotein receptor-related protein 1	Q91ZX7;Q3U454;Q811K6;Q8C4T5	YWTDGDNISMANM	_LYWTDGDN(de)ISM(ox)ANM(ox)DGSN(de)HTLLFSGQK_
1734	Glycosylation	IPI00119063	Prolow-density lipoprotein receptor-related protein 1	Q91ZX7;Q3U454;Q811K6;Q8C4T5	ANMDGSNHTLLFS	_LYWTDGDN(de)ISM(ox)ANM(ox)DGSN(de)HTLLFSGQK_
3090	Glycosylation	IPI00119063	Prolow-density lipoprotein receptor-related protein 1	Q91ZX7;Q3U454;Q811K6;Q8C4T5	IRRMHLNGSNVQV	_M(ox)HLN(de)GSNVQVLHR_
240	Glycosylation	IPI00119063	Prolow-density lipoprotein receptor-related protein 1;Putative uncharacterized protein;31 kDa protein	Q91ZX7;Q3U454;Q811K6;Q8C4T5;Q3U5J2	MDFSYANETVCWV	_QTTAM(ox)DFSYAN(de)ETVCWVHVGDSAAQTQLK_
151	Glycosylation	IPI00119095	Ganglioside GM2 activator	Q60648;Q5F1Z8	YSLPTSNFTVPDL	_EGTYSLPTSN(de)FTVPDLELPSWLSTGNYR_
164	Glycosylation	IPI00119299	Isoform 1 of Leukemia inhibitory factor receptor;Isoform 2 of Leukemia inhibitory factor receptor	P42703-1;P42703;Q3U234;Q3UKU5;P42703-2	ALPHPSNATWEIK	_GSALPHPSN(de)ATWEIK_
675	Glycosylation	IPI00119299	Isoform 1 of Leukemia inhibitory factor receptor;Isoform 2 of Leukemia inhibitory factor receptor	P42703-1;P42703;Q3U234;Q3UKU5;P42703-2	WRKVPSNSTETVI	_KVPSN(de)STETVIESDQFQPGVR_
402	Glycosylation	IPI00119299	Isoform 1 of Leukemia inhibitory factor receptor;Isoform 2 of Leukemia inhibitory factor receptor	P42703-1;P42703;Q3U234;Q3UKU5;P42703-2	PGQEIHNFTLTGR	_LGVQM(ox)HPGQEIHN(de)FTLTGR_
69	Glycosylation	IPI00119809	Galectin-3-binding protein	Q07797	RALGYENATQALG	_ALGYEN(de)ATQALGR_
81		IPI00312711	inter alpha-trypsin inhibitor, heavy chain 4 isoform 1;inter alpha-trypsin inhibitor, heavy chain 4 isoform 2;Inter alpha-trypsin inhibitor, heavy chain 4	O54882;Q505P8;Q8C7G9;Q8C7K5;Q91W60;Q9DBK8;A6X935	RKAFITNFSMIID	_KAFITN(de)FSM(ox)IIDGVTYPGVVK_
517		IPI00312711	inter alpha-trypsin inhibitor, heavy chain 4 isoform 1;inter alpha-trypsin inhibitor, heavy chain 4 isoform 2;Inter alpha-trypsin inhibitor, heavy chain 4	O54882;Q505P8;Q8C7G9;Q8C7K5;Q91W60;Q9DBK8;A6X935	GQMHMQNITFQTE	_VSGQM(ox)HM(ox)QN(de)ITFQTEASVAQQEK_
201	Glycosylation	IPI00120187	Fibromodulin	P50608;Q543D2;Q7TPZ1;Q8BNU3	ALEGLENLTALYL	_VPNNALEGLEN(de)LTALYLHHN(de)EIQEVGSSM(ox)R_
66	Glycosylation	IPI00120832	Major urinary protein 3;Mup3 protein;major urinary protein 26	P04939;Q3KQQ2;A9R9V7;Q80YX8	MRAFVENITVLEN	_AFVEN(de)ITVLENSLVFK_
107		IPI00120856	Isoform 1 of CD302 antigen;Isoform 2 of CD302 antigen	Q9DCG2-1;Q9DCG2;A2AW85;Q9DCG2-2;A2AW84	KWYDHSNMTFDKW	_WYDHSN(de)M(ox)TFDKWADQDGEDLVDTCGFLYTK_
323	Glycosylation	IPI00121114	Serum paraoxonase/lactonase 3	Q62087;Q4FZK0;Q99JS7	STLYANNGSVLQG	_VSTLYAN(de)N(de)GSVLQGSTVASVYHK_
187		IPI00121240	apolipoprotein N	Q8BUM4	FKASVVNVTQHCT	_ASVVN(de)VTQHCTM(ox)ESWESM(ox)NEVAR_
167	Glycosylation	IPI00121378	CD166 antigen	Q61490;Q3TTY3;Q54AJ5;Q5MPX5	DSYPDGNITWYRN	_DSYPDGN(de)ITWYR_
480	Glycosylation	IPI00121378	CD166 antigen	Q61490;Q3TTY3;Q54AJ5;Q5MPX5	IISPEENVTLTCT	_IIISPEEN(de)VTLTCTAENQLER_
95	Glycosylation	IPI00121378	CD166 antigen	Q61490;Q3TTY3;Q54AJ5;Q5MPX5	RLSLSENYTLSIA	_LSLSEN(de)YTLSIANAK_
158	Glycosylation	IPI00121550	Sodium/potassium-transporting ATPase subunit beta-1	P14094;B0LAB6;Q3TRA6;Q3TSQ1;Q3TV47;Q545P0	KLDWLGNCSGLND	_FKLDWLGN(de)CSGLNDDSYGYR_
266	Glycosylation	IPI00121550	Sodium/potassium-transporting ATPase subunit beta-1	P14094;B0LAB6;Q3TRA6;Q3TSQ1;Q3TV47;Q545P0	LAVQFTNLTVDTE	_YLQPLLAVQFTN(de)LTVDTEIR_
295	Glycosylation	IPI00121627	Cleft lip and palate transmembrane protein 1 homolog	Q8VBZ3	KDYYPINESLASL	_DYYPIN(de)ESLASLPLR_
163		IPI00122117	coagulation factor XIII, beta subunit	Q07968;B1AY02;Q3UER0;Q8K0W0	PELEHGNYSTTQR	_KEQETCLAPELEHGN(de)YSTTQR_
335	Glycosylation	IPI00122257	5'-nucleotidase;Putative uncharacterized protein	Q61503;Q0VEE0;Q8C8G9	WRIKLDNYSTQEL	_IKLDN(de)YSTQELGR_
313	Glycosylation	IPI00122257	5'-nucleotidase;Putative uncharacterized protein	Q61503;Q0VEE0;Q8C8G9	GNPILLNSSIPED	_VEFDDKGNVITSYGNPILLN(de)SSIPEDATIK_
463	Glycosylation	IPI00122272	Isoform Long of Extracellular matrix protein 1;Isoform Short of Extracellular matrix protein 1;Extracellular matrix protein	Q61508-1;Q61508;Q61508-2;Q9Z2R8	IPGLIQNMTVRCC	_HKQIPGLIQN(de)M(ox)TVR_
120	Glycosylation	IPI00122293	Prolargin	Q9JK53;Q543S0;Q8CAZ9	PLESFQNATGLRW	_IHYLYLQNNFITELPLESFQN(de)ATGLR_
75	Glycosylation	IPI00816869	Isoform a of P2X purinoceptor 4;purinergic receptor P2X4;Isoform c of P2X purinoceptor 4;Isoform b of P2X purinoceptor 4;P2X purinoceptor;Isoform d of P2X purinoceptor 4	Q9JJX6-1;Q9JJX6;Q3TR36;Q3UCX4;Q9Z257;Q9JJX6-3;Q9JJX6-2;Q9Z256;Q9JJX6-4;Q9WUN9	KGVAVTNTSQLGF	_GVAVTN(de)TSQLGFR_
311		IPI00122557	esterase 31-like isoform 1;Isoform 2 of Liver carboxylesterase 31-like	Q8VCU1-1;Q8VCU1;Q8VCU1-2	IKQKNVNISYIVN	_QKNVN(de)ISYIVNDSFFPQRPEK_
317		IPI00122557	esterase 31-like isoform 1;Isoform 2 of Liver carboxylesterase 31-like	Q8VCU1-1;Q8VCU1;Q8VCU1-2	NISYIVNDSFFPQ	_QKNVN(de)ISYIVNDSFFPQRPEK_
243	Glycosylation	IPI00881377	serine (or cysteine) proteinase inhibitor, clade G, member 1 precursor;Plasma protease C1 inhibitor;Serine (Or cysteine) proteinase inhibitor, clade G, member 1	A2ATR7;P97290;A2ATR8	IRDTYVNASQSLY	_DTYVN(de)ASQSLYGSSPR_
312	Glycosylation	IPI00123194	Biglycan	P28653;Q3TAF9;Q3TNY9;Q3UXK8;Q7TMW3	VYLHSNNITKVGI	_LLQVVYLHSN(de)N(de)ITK_
271	Glycosylation	IPI00123194	Biglycan	P28653;Q3TAF9;Q3TNY9;Q3UXK8;Q7TMW3	QIRMIENGSLSFL	_M(ox)IEN(de)GSLSFLPTLR_
206	Glycosylation	IPI00123196	Decorin	P28654;Q3TSV1;Q3UKR1;Q6LAK9	IRISDTNITAIPQ	_ISDTN(de)ITAIPQGLPTSLTEVHLDGNK_
294	Glycosylation	IPI00123223	Murinoglobulin-1;98 kDa protein	P28665	CSTQEVNITELQS	_EVNSQLDNN(de)GCSTQEVN(de)ITELQSK_
313	Glycosylation	IPI00123223	Murinoglobulin-1;98 kDa protein	P28665	VQLFHVNATVTEE	_N(de)YEVQLFHVN(de)ATVTEEGTGLEFSR_
993	Glycosylation	IPI00123223	Murinoglobulin-1	P28665	YVLKYLNETQQLT	_YLN(de)ETQQLTQKIKTK_
155	Glycosylation	IPI00123342	Hypoxia up-regulated protein 1	Q9JKR6;Q8VCI2	VLGMVLNYSRSLA	_FQISPQLQFSPEEVLGM(ox)VLN(de)YSR_
596	Glycosylation	IPI00123342	Hypoxia up-regulated protein 1	Q9JKR6;Q8VCI2	SSDAKENGTDAVQ	_LGNTISSLFGGGTSSDAKEN(de)GTDAVQEEEESPAEGSK_
830	Glycosylation	IPI00123342	Hypoxia up-regulated protein 1	Q9JKR6;Q8VCI2	ALDNLLNHSSIFL	_LSALDNLLN(de)HSSIFLK_
515	Glycosylation	IPI00123342	Hypoxia up-regulated protein 1	Q9JKR6;Q8VCI2	RVFGSQNLTTVKL	_VFGSQN(de)LTTVK_
309	Glycosylation	IPI00123635	Immunoglobulin superfamily containing leucine-rich repeat protein	Q6GU68	RFQAFANGSLLIP	_FQAFAN(de)GSLLIPDFGK_
283	Glycosylation	IPI00757771	44 kDa protein;Isoform 1 of Neuroplastin;Isoform 3 of Neuroplastin;31 kDa protein;Isoform 4 of Neuroplastin	P97300-1;P97300;P97300-3;P97300-4	VFEEISNSSGRFF	_KKEN(de)GVFEEISN(de)SSGR_
101	Glycosylation	IPI00129755	Alpha-1-antitrypsin 1-2;Alpha-1-antitrypsin 1-1;Alpha-1-antitrypsin 1-4;Serpina1a protein;serine (or cysteine) proteinase inhibitor, clade A, member 1c;Alpha-1-antitrypsin 1-3	P22599;P07758;Q00897;Q8VC41;Q3KQQ4;Q00896	LEGLQFNLTQTSE	_GDTHTQILEGLQFN(de)LTQTSEADIHK_
197	Glycosylation	IPI00124221	Sodium/potassium-transporting ATPase subunit beta-3	P97370;Q1WWL1;Q3U9D4;Q3UFH4;Q544Q7;Q71VC6	CLPKEENATIATY	_EEN(de)ATIATYPEFGVLDLK_
55	Glycosylation	IPI00124666	Semaphorin-4G;MKIAA1619 protein (Fragment)	Q9WUH7;Q69ZE7	FKGQTQNYSTLLL	_GQTQN(de)YSTLLLEEASER_
730	Glycosylation	IPI00124700	Transferrin receptor protein 1	Q62351;Q542D9;Q8JZS3	KNITAFNETLFRN	_NITAFN(de)ETLFR_
109	Glycosylation	IPI00124830	Isoform 2 of Leukocyte surface antigen CD47;35 kDa protein;Isoform 1 of Leukocyte surface antigen CD47	Q61735-2;Q61735;Q61735-1;Q3U967	RDAMVGNYTCEVT	_DAM(ox)VGN(de)YTCEVTELSR_
186	Glycosylation	IPI00125220	Cathepsin Z	Q9WUU7;Q545I6;Q9ES94	ECHTIQNYTLWRV	_ECHTIQN(de)YTLWR_
146	Glycosylation	IPI00125310	Complement C1q subcomponent subunit A;complement component 1, q subcomponent, A chain precursor	P98086;Q3TXB1;Q3UBX7;Q9DCM6	QESPYQNHTGRFI	_VLTNQESPYQN(de)HTGR_
256		IPI00262024	ectonucleoside triphosphate diphosphohydrolase 5 isoform a;Ectonucleoside triphosphate diphosphohydrolase 5	Q3TQC7;Q8BR23;Q8CD29;Q9WUZ9;Q544J4	TSFEMFNSTFKLY	_GYLTSFEM(ox)FN(de)STFK_
514	Glycosylation	IPI00125813	Dipeptidyl peptidase 4;dipeptidylpeptidase 4 isoform 2	P28843;A2AS84;Q3TR43	LDFIVLNETRFWY	_LDFIVLN(de)ETR_
144		IPI00125813	Dipeptidyl peptidase 4;dipeptidylpeptidase 4 isoform 2	P28843;A2AS84;Q3TR43	TEEKIPNNTQWIT	_QLITEEKIPN(de)NTQWITWSPEGHK_
104	Glycosylation	IPI00126186	Macrophage mannose receptor 1;mannose receptor, C type 1 precursor	Q61830;Q2HZ94	QKWECKNDTLFGI	_WECKN(de)DTLFGIK_
19	Glycosylation	IPI00126253	LAG1 longevity assurance homolog 2;29 kDa protein;26 kDa protein;16 kDa protein	Q924Z4	RLWLPVNLTWADL	_LWLPVN(de)LTWADLEDKDGR_
356	Glycosylation	IPI00126769	Cathepsin F	Q9R013;A4FUP7;Q99KQ9;Q9ES93	MAKVYINDSVELS	_VYIN(de)DSVELSR_
277		IPI00126966	Major histocompatibility complex class I b;hypothetical protein LOC667977;MHC classIb T5;MCG68121, isoform CRA_b;MHC class I-alpha;41 kDa protein;H-2 class I histocompatibility antigen, D-K alpha chain;MHC H-2K antigen;40 kDa protein;similar to MHC class I	O19440;Q4VCN9;Q6PEB5;Q6QMF2;Q6QMF4;A7VMS6;Q0WXH4;O19441;Q31215;Q66JR0;Q31149;P14426;Q31116;Q95457;Q31141;Q0WXH7;Q0WXI6;Q31152;Q31220;Q3UWA5;Q95H92;P01898;O19454;Q4VCN4;Q4VCP2	PLGKEQNYTCHVY	_EQN(de)YTCHVYHEGLPEPLTLR_
197	Glycosylation	IPI00126966	Major histocompatibility complex class I b;similar to MHC H2-K 24 polypeptide isoform 1;MCG129835, isoform CRA_b;H-2 class I histocompatibility antigen, K-D alpha chain;MHC class I H2-K gene (Fragment);similar to MHC H2-K 24 polypeptide isoform 3;similar t	O19440;Q4VCN9;Q6PEB5;Q6QMF2;Q6QMF4;O35641;Q31148;Q31614;Q31634;Q5KTQ1;Q6RJ37;P01902;Q5KTQ2;Q31191	RYLELGNETLLRT	_YLELGN(de)ETLLR_
551	Glycosylation	IPI00127406	Procollagen-lysine,2-oxoglutarate 5-dioxygenase 3;Protein	Q9R0E1	EQYIHENYSRALD	_EQYIHEN(de)YSR_
198	Glycosylation	IPI00127407	Procollagen-lysine,2-oxoglutarate 5-dioxygenase 1;Procollagen-lysine, 2-oxoglutarate 5-dioxygenase 1	Q9R0E2;A2A7Z0;Q3TZN4;Q3UE11;Q91Z26;A8Y5E6	EKREQINISLDHR	_EQIN(de)ISLDHR_
539	Glycosylation	IPI00127407	Procollagen-lysine,2-oxoglutarate 5-dioxygenase 1;Procollagen-lysine, 2-oxoglutarate 5-dioxygenase 1	Q9R0E2;A2A7Z0;Q3TZN4;Q3UE11;Q91Z26;A2A7Y9	EKYIHENYTKALA	_YIHEN(de)YTK_
105	Glycosylation	IPI00127447	Lysosome membrane protein 2	O35114;Q3TCS7	NIQFGENGTTISA	_ANIQFGEN(de)GTTISAVTNK_
122	Glycosylation	IPI00127447	Lysosome membrane protein 2	O35114;Q3TCS7	AYVFERNQSVGDP	_AYVFERN(de)QSVGDPNVDLIR_
45	Glycosylation	IPI00127447	Lysosome membrane protein 2	O35114;Q3TCS7	KNMVLQNGTKVFN	_NM(ox)VLQN(de)GTK_
221	Glycosylation	IPI00128154	Cathepsin L1	P06797;Q3TNC8;Q3TT75;Q3TVJ1;Q3U5U9;Q3UHZ4;Q3UWH6;Q543M3;Q6LAF5;Q9D0C0	AEFAVANDTGFVD	_AEFAVAN(de)DTGFVDIPQQEK_
156	Glycosylation	IPI00128249	Alpha-2-HS-glycoprotein	P29699;O35399;Q3TIU3;Q3UEK5;Q3UEK9	PLLTPFNDTNVVH	_CPLLTPFN(de)DTNVVHTVN(de)TALAAFNTQNN(de)GTYFK_
176	Glycosylation	IPI00128249	Alpha-2-HS-glycoprotein	P29699;O35399;Q3TIU3;Q3UEK5;Q3UEK9	AFNTQNNGTYFKL	_CPLLTPFN(de)DTNVVHTVN(de)TALAAFNTQNN(de)GTYFK_
99	Glycosylation	IPI00128249	Alpha-2-HS-glycoprotein	P29699;O35399;Q3TIU3;Q3UEK5;Q3UEK9	DPTPLANCSVRQL	_RPFGVVYEM(ox)EVDTLETTCHALDPTPLAN(de)CSVR_
240	Glycosylation	IPI00877345	hemopexin precursor;Hemopexin	Q3UKP2;Q8K1U6;Q91X72	GHGRPRNGTAHGN	_N(de)GTAHGN(de)STHPM(ox)HSR_
246	Glycosylation	IPI00877345	hemopexin precursor;Hemopexin	Q3UKP2;Q8K1U6;Q91X72	NGTAHGNSTHPMH	_N(de)GTAHGN(de)STHPM(ox)HSR_
255	Glycosylation	IPI00128989	V-type proton ATPase subunit S1;Putative uncharacterized protein;ATPase, H+ transporting, lysosomal accessory protein	Q9R1Q9;Q3THZ3;Q3TT23;Q3TWN7;Q3UCY7;Q3UWN7;Q571E2;Q8K567;Q3TKX1;B7FAU7	HPPVSYNDTAPRI	_QLLQTQVASPAIHPPVSYN(de)DTAPR_
162	Glycosylation	IPI00828662	gamma-glutamyl hydrolase precursor;Isoform I of Gamma-glutamyl hydrolase;35 kDa protein;Isoform II of Gamma-glutamyl hydrolase	B1AWC1;B9EKG3;Q91XH7;Q9Z0L8-1;Q9Z0L8;Q9Z0L8-2	SKKLPLNFTEGAR	_KLPLN(de)FTEGAR_
318		IPI00129250	Leucine-rich alpha-2-glycoprotein 1	Q91XL1	NKMFSQNDTRCAG	_M(ox)FSQN(de)DTR_
319	Glycosylation	IPI00554860	lipase A precursor;Lysosomal acid lipase/cholesteryl ester hydrolase	Q3TEL5;Q6PDR1;Q8C2G7;Q9Z0M5	KNYFHYNQSFPPS	_N(de)YFHYNQSFPPSYNIK_
159	Glycosylation	IPI00554860	lipase A precursor;Lysosomal acid lipase/cholesteryl ester hydrolase	Q3TEL5;Q6PDR1;Q8C2G7;Q9Z0M5	SINYILNKTGQEQ	_YDLPASINYILN(de)K_
386		IPI00129304	Collectin-12	Q8K4Q8	DDLTSLNNTLVNI	_HTDDLTSLN(de)NTLVNIR_
183		IPI00129485	Fc receptor, IgG, low affinity IIb isoform 1;Isoform IIB1' of Low affinity immunoglobulin gamma Fc region receptor II;Fc receptor, IgG, low affinity IIb isoform 2;Fc receptor, IgG, low affinity III;Low affinity immunoglobulin gamma Fc region receptor III	P08101-1;P08101;P08101-3;P08101-2;P97918;Q7TMW9;Q9ES92;P08508;Q5D5I8;Q5D5J5	FSIPKANHSHSGD	_AN(de)HSHSGDYYCK_
75		IPI00129485	Fc receptor, IgG, low affinity IIb isoform 1;Isoform IIB1' of Low affinity immunoglobulin gamma Fc region receptor II;Fc receptor, IgG, low affinity IIb isoform 2	P08101-1;P08101;P08101-3;P08101-2;P97918	GTHNPGNSSTQWF	_EDTVTLTCEGTHNPGN(de)SSTQWFHN(de)GR_
176		IPI00129485	Fc receptor, IgG, low affinity IIb isoform 1;Isoform IIB1' of Low affinity immunoglobulin gamma Fc region receptor II;Fc receptor, IgG, low affinity IIb isoform 2	P08101-1;P08101;P08101-3;P08101-2;P97918	YHHYSSNFSIPKA	_YHHYSSN(de)FSIPK_
62	Glycosylation	IPI00129526	Endoplasmin	P08113;Q3UAD6;Q3UBU0;Q8C2R2;Q8CCY5;Q91V38;Q9CW12	IQLDGLNASQIRE	_EGSRTDDEVVQREEEAIQLDGLN(de)ASQIR_
791		IPI00130010	complement component factor H;Putative uncharacterized protein;125 kDa protein	P06909;Q61848;Q6NZK3;Q8C5S1	LTEFTHNSTMDYK	_LTEFTHN(de)STM(ox)DYK_
226		IPI00130117	integrin alpha 9 isoform a;similar to integrin alpha 9 protein	B8JK39;B9EKC4;Q91YD5	GTLKVLNLTDNTY	_VLN(de)LTDNTYFK_
174	Glycosylation	IPI00130486	FK506-binding protein 9	Q9Z247	FVRYHYNGTFLDG	_YHYN(de)GTFLDGTLFDSSHNR_
286	Glycosylation	IPI00130486	FK506-binding protein 9	Q9Z247	FLRYHYNGTLLDG	_YHYN(de)GTLLDGTLFDSSYSR_
221	Glycosylation	IPI00130661	Tripeptidyl-peptidase 1	O89023;Q3TDY6;Q3U2Z6;Q8BNF3	VGSGTTNNSQACA	_DVGSGTTN(de)NSQACAQFLEQYFHNSDLTEFM(ox)R_
209	Glycosylation	IPI00130661	Tripeptidyl-peptidase 1	O89023;Q3TDY6;Q3U2Z6;Q8BNF3	VLRQRYNLTAKDV	_QRYN(de)LTAK_
139	Glycosylation	IPI00130754	Ephrin-B1	P52795;Q544L9	YITSTSNGSLEGL	_KYHDYYITSTSN(de)GSLEGLENR_
1332		IPI00672438	similar to complement component 4, gene 1 isoform 3;Complement C4-B;similar to complement component 4, gene 1 isoform 5;sex-limited protein;similar to complement component 4, gene 1 isoform 4;similar to complement C4	P01029;B2RWX2;B2RXW7;Q3TAT4;Q3TYN1;Q9QWR4;B0G0Y3;B9EIU2;O88305;Q62237;Q62238;Q6P3Y0;Q9QUF7;Q9QUF8;Q9QUF9;Q9Z0D8;Q9Z0J3	TEEKALNVTLSSM	_ALN(de)VTLSSM(ox)GR_
604	Glycosylation	IPI00131143	Isoform 1 of Protein sel-1 homolog 1;Isoform 2 of Protein sel-1 homolog 1	Q9Z2G6-1;Q9Z2G6;Q3TT70;Q5DTL8;Q9Z2G6-2;Q6GTY4;Q6PFR3;Q80YC0	ATIVGENETYPRA	_EATIVGEN(de)ETYPR_
427	Glycosylation	IPI00131143	Isoform 1 of Protein sel-1 homolog 1;Isoform 2 of Protein sel-1 homolog 1	Q9Z2G6-1;Q9Z2G6;Q3TT70;Q5DTL8;Q9Z2G6-2;Q6GTY4;Q6PFR3;Q80YC0	DIVPQSNETALHY	_M(ox)YSEGSDIVPQSN(de)ETALHYFK_
370	Glycosylation	IPI00131168	Cholinesterase;butyrylcholinesterase precursor	Q03311;Q499C7;Q543J3	PGFSKDNDSLITR	_DN(de)DSLITR_
39	Glycosylation	IPI00131830	Serine protease inhibitor A3K	P07759	FHEHQDNGTQDDS	_EM(ox)DIVFHEHQDN(de)GTQDDSLTLASVN(de)TDFAFSLYK_
185	Glycosylation	IPI00131830	Serine protease inhibitor A3K;Serine protease inhibitor A3M	P07759;Q03734	INDYVSNQTQGMI	_NLINDYVSN(de)QTQGM(ox)IKELISELDER_
270	Glycosylation	IPI00131830	Serine protease inhibitor A3K	P07759	ELKYTGNASALLI	_YTGN(de)ASALLILPDQGR_
279	Glycosylation	IPI00923060	ADAM metallopeptidase domain 10 precursor;Disintegrin and metalloproteinase domain-containing protein 10	B8JJJ0;O35598;B3SRB2;Q6NZC0	VKRIRINTTSDEK	_IN(de)TTSDEKDPTNPFR_
185	Glycosylation	IPI00132279	ADP-ribosyl cyclase 2;22 kDa protein;Putative uncharacterized protein	Q64277;Q3TPZ1	VINVMLNGSEPKG	_DSSGVINVM(ox)LN(de)GSEPK_
1064	Glycosylation	IPI00132600	Niemann-Pick C1 protein;Niemann Pick type C1	O35604;Q3U2B2;Q7TMD4;Q8BLK0	ARLIASNITETMR	_LIASN(de)ITETM(ox)R_
160	Glycosylation	IPI00133103	Protein CREG1;11 kDa protein	O88668	GTVTKVNKTEEDY	_VN(de)KTEEDYAR_
44	Glycosylation	IPI00133500	Phosphatidylcholine-sterol acyltransferase;lecithin cholesterol acyltransferase precursor	P16301;Q791M3;Q8K139;Q9CW47	PKAELSNHTRPVI	_AELSN(de)HTRPVILVPGCLGNR_
108	Glycosylation	IPI00133500	Phosphatidylcholine-sterol acyltransferase;lecithin cholesterol acyltransferase precursor	P16301;Q791M3;Q8K139;Q9CW47	NTRIVYNHSSGRV	_IVYN(de)HSSGR_
163		IPI00551169	Isoform 2 of Microfibril-associated glycoprotein 4;Isoform 1 of Microfibril-associated glycoprotein 4	Q9D1H9-2;Q9D1H9;Q9D1H9-1	DLEDFENNTAYAK	_VDLEDFEN(de)NTAYAK_
115	Glycosylation	IPI00222967	Isoform LAMP-2B of Lysosome-associated membrane glycoprotein 2;Lysosomal membrane glycoprotein 2, isoform CRA_a;lysosomal membrane glycoprotein 2 isoform 1;Isoform LAMP-2A of Lysosome-associated membrane glycoprotein 2;Isoform LAMP-2C of Lysosome-associate	P17047-2;P17047;Q8C5K0;A2A430;Q3TWE1;Q3TXG5;Q3UIW3;P17047-1;P17047-3;Q8BSG8;Q8C876;Q9CZU7	DIVLSYNTSDSTV	_EASHYSIHDIVLSYN(de)TSDSTVFPGAVAK_
754	Glycosylation	IPI00134585	Glutamyl aminopeptidase	P16406;Q52JJ6;Q6P3C1;Q8CD51	DREALGNASQLFD	_EALGN(de)ASQLFDSWLK_
189	Glycosylation	IPI00134585	Glutamyl aminopeptidase	P16406;Q52JJ6;Q6P3C1;Q8CD51	EFKGWLNGSLVGF	_GWLN(de)GSLVGFYK_
637	Glycosylation	IPI00134585	Glutamyl aminopeptidase	P16406;Q52JJ6;Q6P3C1;Q8CD51	AEALSSNHTRFSA	_VNYEGGTWDWIAEALSSN(de)HTR_
89	Glycosylation	IPI00134691	UDP-glucuronosyltransferase 1-1;UDP glucuronosyltransferase 1 family, polypeptide A1	Q63886;Q561M6;Q6XL50;Q9R0A4	VPFQKENVTATLV	_KFPVPFQKEN(de)VTATLVELGR_
430	Glycosylation	IPI00877320	tissue-nonspecific alkaline phosphatase precursor;Alkaline phosphatase, tissue-nonspecific isozyme	B7XGA6;Q3TJD3;Q3TQ02;Q6P1B0;Q8JZS4;Q9EQ79;P09242	VDGERENVSMVDY	_VVDGEREN(de)VSM(ox)VDYAHNNYQAQSAVPLR_
275	Glycosylation	IPI00134808	C4b-binding protein;complement component 4 binding protein precursor;Complement component 4 binding protein	P08607;Q3UW06;Q80SX2;Q91X48;B2KGU5	VRLACLNGTVLRG	_LACLN(de)GTVLR_
227	Glycosylation	IPI00134808	C4b-binding protein;complement component 4 binding protein precursor;Complement component 4 binding protein;26 kDa protein;Complement component 4 binding protein	P08607;Q3UW06;Q80SX2;Q91X48;B2KGU5;B2KGU6	IGCTVVNKTVPVW	_LVGSPFIGCTVVN(de)K_
627		IPI00136012	Vitamin K-dependent gamma-carboxylase	Q9QYC7;B2RS80;Q3TME3;Q8BSR0	LKEKVENGSETGP	_VEN(de)GSETGPLPPELQPLLEGEVK_
225	Glycosylation	IPI00136642	Antithrombin-III	P32261;Q543J5	INNWVANKTEGRI	_VTINNWVAN(de)KTEGR_
345		IPI00658539	cathepsin A isoform a;Lysosomal protective protein	Q9D2D1;P16675;Q544R6	LDPPCTNTTAPSN	_LDPPCTN(de)TTAPSNYLNNPYVR_
546	Glycosylation	IPI00138209	Isoform 2A of Desmocollin-2;Isoform 2B of Desmocollin-2	P55292-1;P55292;Q6PEU5;Q8C5C8;Q99KH1;P55292-2;Q544V1	VRNGIYNITVLAL	_N(de)GIYN(de)ITVLALDADGR_
377	Glycosylation	IPI00138342	Liver carboxylesterase N	P23953	RFHSELNISESMI	_FHSELN(de)ISESM(ox)IPAVIEK_
274	Glycosylation	IPI00138342	Liver carboxylesterase N;19 kDa protein	P23953	ATLSQCNDTSSAA	_NIQAVNEIIATLSQCN(de)DTSSAAM(ox)VQCLR_
513	Glycosylation	IPI00139788	Serotransferrin	Q921I1	APGYEKNSTLCDL	_FDEFFSQGCAPGYEKN(de)STLCDLCIGPLK_
96		IPI00153143	UDP glucuronosyltransferase 2 family, polypeptide B1	Q8R084	FEKWVGNWTYELK	_WVGN(de)WTYELK_
81	Glycosylation	IPI00153258	Isoform 1 of Protein Z-dependent protease inhibitor;Isoform 2 of Protein Z-dependent protease inhibitor	Q8R121-1;Q8R121;Q8R121-2	ASQQLSNETSSFG	_ASQQLSN(de)ETSSFGFNLLR_
70	Glycosylation	IPI00153316	UDP-glucuronosyltransferase 3A1	Q3UP75	PDFRKENSSYQVI	_KEN(de)SSYQVINWR_
117	Glycosylation	IPI00153468	Transmembrane emp24 domain-containing protein 4;Transmembrane emp24 protein transport domain containing 4	Q8R1V4;Q5SVW9	QICLHSNSTRMAL	_FTFTSHTPGDHQICLHSN(de)STR_
167	Glycosylation	IPI00154056	Lysosomal acid phosphatase;Putative uncharacterized protein	P24638;A2AGR5;Q3U4F3;B7ZCF4;Q3UZN1	RYEQLQNETRQTP	_YEQLQN(de)ETR_
144		IPI00719927	Protocadherin 1 isoform 2;Protocadherin 1	Q2TJI9;Q2TJH4;Q2TJI8;Q8CFX3;Q8QZT6;Q9CVI3	VIQVKANDSDQGA	_AN(de)DSDQGANAEIDYTFHQAPEVVR_
93	Glycosylation	IPI00165730	Isoform 1 of Putative phospholipase B-like 2;Isoform 2 of Putative phospholipase B-like 2	Q3TCN2-1;Q3TCN2;Q3TCN2-2	DAVAWANLTNAIR	_LEDGFHPDAVAWAN(de)LTNAIR_
174		IPI00169617	Glycolipid transfer protein domain-containing protein 2	Q8K0R6;Q8K1B3	ARVHGPNASHYTS	_VHGPN(de)ASHYTSLM(ox)TM(ox)ITWER_
146		IPI00169782	ST6 beta-galactosamide alpha-2,6-sialyltranferase 1	Q8BM62;Q8K1L1;Q9JJM6	HLRDHVNVSMIEA	_DHVN(de)VSM(ox)IEATDFPFN(de)TTEWEGYLPK_
158		IPI00169782	ST6 beta-galactosamide alpha-2,6-sialyltranferase 1	Q8BM62;Q8K1L1;Q9JJM6	ATDFPFNTTEWEG	_DHVN(de)VSM(ox)IEATDFPFN(de)TTEWEGYLPK_
184	Glycosylation	IPI00173181	Isoform 1 of Transmembrane protease, serine 6;Isoform 2 of Transmembrane protease, serine 6;Isoform 3 of Transmembrane protease, serine 6	Q9DBI0-1;Q9DBI0;Q9DBI0-2;Q9DBI0-3	VDELLSNSSTLAS	_ELLVDELLSN(de)SSTLASYK_
280	Glycosylation	IPI00177214	Ig mu chain C region membrane-bound form;Ig mu chain C region secreted form	P01873;P01872	IMESHPNGTFSAK	_IM(ox)ESHPN(de)GTFSAK_
140	Glycosylation	IPI00187353	ERO1-like protein beta	Q8R2E9;Q14DR9	NKLGAINSTLSNE	_LGAIN(de)STLSNESK_
159	Glycosylation	IPI00221998	Adipocyte plasma membrane-associated protein	Q9D7N9	GIRAGPNGTLFVV	_AGPN(de)GTLFVVDAYK_
361		IPI00222429	nodal modulator 1	Q3TKZ1;Q6GQT9;Q8BJM1;Q8BJM8;Q8BLS9;Q8K074;Q8R1I7	GSFRLENITTGTY	_LEN(de)ITTGTYTIHAQK_
210		IPI00222429	nodal modulator 1	Q3TKZ1;Q6GQT9;Q8BJM1;Q8BJM8;Q8BLS9;Q8K074;Q8R1I7	LIVAGYNVSGSVR	_VTNSNANAAGPLIVAGYN(de)VSGSVR_
184		IPI00222937	Isoform 1 of Heat shock 70 kDa protein 13;Isoform 2 of Heat shock 70 kDa protein 13	Q8BM72-1;Q8BM72;Q8BM72-2	FDLQQRNSTIQAA	_N(de)STIQAANLAGLK_
77		IPI00331597	Histone H1.3;Histone H1.4;Histone H1.2;histone cluster 1, H1t	P43277;Q149Z9;Q3U292;P43274;P15864;Q3UXH2;Q5SZA3;Q07133	GYDVEKNNSRIKL	_KALAAAGYDVEKN(de)NSR_
256	Glycosylation	IPI00223987	Leucyl-cystinyl aminopeptidase	Q8C129;Q3TTA8;Q6NY09;Q8BZ14	PLLTGHNYTLKIE	_QVEILEYPYHEQIAVVAPEPLLTGHN(de)YTLK_
253		IPI00224073	Probable carboxypeptidase PM20D1	Q8C165	DLMLQVNMTPGHS	_GALDLM(ox)LQVN(de)M(ox)TPGHSSAPPK_
443	Glycosylation	IPI00224073	Probable carboxypeptidase PM20D1;Protein	Q8C165	DTRHYANITNGMY	_HYAN(de)ITN(de)GM(ox)YR_
546		IPI00224237	Isoform 1 of Transmembrane and TPR repeat-containing protein 3;Isoform 2 of Transmembrane and TPR repeat-containing protein 3	Q8BRH0-1;Q8BRH0;Q8BRH0-2	ANLIRANESRLEE	_AN(de)ESRLEEADQLYR_
52	Glycosylation	IPI00463764	UDP-glucuronosyltransferase 3A2;Putative uncharacterized protein	Q8JZZ0;Q8BRY7	LHEGGHNVTKLLY	_VSQVLHEGGHN(de)VTK_
660		IPI00225715	glycosylphosphatidylinositol specific phospholipase D1	O70362;Q7TNZ4;Q8R432;Q8VCU2;Q9DBH3	SGYVRVNGTLTQV	_VN(de)GTLTQVLLVGAPTHDDVSK_
102		IPI00553528	hypothetical protein LOC434674;Putative uncharacterized protein;cDNA fis, clone TRACH2000665, moderately similar to Rattus norvegicus putative integral membrane transport protein;56 kDa protein;C730048C13Rik protein;Putative uncharacterized protein	B2RT89;Q8BWE8;Q96LX3;Q810T7;Q3V3G0	WHLLHLNGTFSNE	_FAQPQWHLLHLN(de)GTFSN(de)ETEPDTEPCVDGWVYDR_
107		IPI00553528	hypothetical protein LOC434674;Putative uncharacterized protein;cDNA fis, clone TRACH2000665, moderately similar to Rattus norvegicus putative integral membrane transport protein;56 kDa protein;C730048C13Rik protein;Putative uncharacterized protein	B2RT89;Q8BWE8;Q96LX3;Q810T7;Q3V3G0	LNGTFSNETEPDT	_FAQPQWHLLHLN(de)GTFSN(de)ETEPDTEPCVDGWVYDR_
331	Glycosylation	IPI00226790	GPI transamidase component PIG-T;65 kDa protein;similar to GPI transamidase component PIG-T precursor (Phosphatidylinositol-glycan biosynthesis class T protein) (Neuronal development-associated protein 7) isoform 2;Phosphatidylinositol glycan anchor biosyn	Q8BXQ2;Q3U047;Q3U5R2;B7ZC19	FDTAMINNSRNLN	_KTYAVYDLFDTAM(ox)IN(de)NSR_
917	Glycosylation	IPI00226932	Isoform 1 of Uncharacterized protein KIAA0090;Isoform 2 of Uncharacterized protein KIAA0090;Isoform 3 of Uncharacterized protein KIAA0090	Q8C7X2-1;Q8C7X2;A1L2Z3;Q8C7X2-2;A2AMV0;Q8C7X2-3	ERFINYNQTVSRM	_FINYN(de)QTVSR_
428	Glycosylation	IPI00226958	Nicalin;63 kDa protein	Q8VCM8	LTRVIYNLTEKGT	_VIYN(de)LTEK_
287	Glycosylation	IPI00227857	Hepatocyte growth factor activator	Q9R098;A8C1W3;Q3TDU8;Q545J3;Q8VCS4	EHCFLGNGTEYRG	_FCNIVPTEHCFLGN(de)GTEYR_
70	Glycosylation	IPI00229820	Protein FAM20A	Q8CID3;A2AGP7	LGTASHNFSGALP	_DLGTASHN(de)FSGALPR_
180	Glycosylation	IPI00462465	Isoform 2 of Membralin;Isoform 1 of Membralin	Q8CIV2-2;Q8CIV2;Q8CIV2-1;Q498A7	SGADALNDSQDFP	_VFKPQSGADALN(de)DSQDFPFPETPAK_
191		IPI00830356	41 kDa protein;VIP36-like protein;Lman2l protein	P59481;Q05CD1	ISAMVNNGSLSYD	_VFPYISAM(ox)VNN(de)GSLSYDHER_
276		IPI00230718	complement component 9	P06683	HSSKPTNISAKFK	_GAGEVSPAEHSSKPTN(de)ISAK_
113	Glycosylation	IPI00272381	Putative uncharacterized protein;Isoform 2 of Prolyl 4-hydroxylase subunit alpha-1;Putative uncharacterized protein	Q60715-1;Q60715;Q3TN84;Q3UF16;Q60715-2;Q3TTT2	SDGFISNLTIQRQ	_DM(ox)SDGFISN(de)LTIQR_
384	Glycosylation	IPI00279079	Fibrinogen beta chain	Q8K0E8;Q3TGR2	SQLVGENRTMTIH	_YKGTAGN(de)ALM(ox)DGASQLVGEN(de)R_
284		IPI00307837	Elongation factor 1-alpha 1	P10126;Q3TII3;Q3UA81;Q3UZQ3;Q4FZE5;Q58E64	VTFAPVNVTTEVK	_VETGVLKPGM(ox)VVTFAPVN(de)VTTEVK_
185	Glycosylation	IPI00308609	Lectin, mannose-binding 2;Vesicular integral-membrane protein VIP36	Q8BJL4;Q9DBH5	ISVMVNNGSLSYD	_VFPYISVM(ox)VN(de)NGSLSYDHSK_
575	Glycosylation	IPI00308971	Cation-independent mannose-6-phosphate receptor	Q07113;B7ZWC4;B9EKB8;Q7TMR1;Q80VF2;Q8C2F9;Q8C6V9;Q8K0J1	DKKISTNITLVCK	_ISTN(de)ITLVCKPGDLESAPVLR_
300	Glycosylation	IPI00309035	Dolichyl-diphosphooligosaccharide--protein glycosyltransferase subunit 1	Q91YQ5;Q3U900;Q5RKP4;Q8BMR3;Q99LY0	YRDEIGNVSTSHL	_DEIGN(de)VSTSHLLILDDSVEM(ox)EIRPR_
52	Glycosylation	IPI00309214	Serum amyloid P-component	P12246;Q4JFI8	LEKPLQNFTLCFR	_LIPHLEKPLQN(de)FTLCFR_
172	Glycosylation	IPI00309230	Beta-glucuronidase;Putative uncharacterized protein;Gusb protein;Putative uncharacterized protein	P12265;Q3TW82;Q6IR10;Q8VEM0;Q99KJ6;Q8BPE3	RITIAINNTLTPH	_ITIAIN(de)NTLTPHTLPPGTIVYK_
416	Glycosylation	IPI00309230	Beta-glucuronidase;Putative uncharacterized protein	P12265;Q3TW82;Q6IR10	LPQSFGNESLRHH	_YGIVVIDECPGVGIVLPQSFGN(de)ESLR_
72	Glycosylation	IPI00310049	Carboxypeptidase B2	Q9JHH6	EVHFFVNASDVDS	_EVHFFVN(de)ASDVDSVK_
201	Glycosylation	IPI00310090	N-acetylgalactosamine-6-sulfatase;Putative uncharacterized protein	Q571E4;Q8CC47	RKTGEANLTQLYT	_KTGEAN(de)LTQLYTQEALDFIQTQHAR_
139	Glycosylation	IPI00311405	Poliovirus receptor-related protein 1;Poliovirus receptor-related 1	Q9JKF6;Q6P9M9	NRESQLNLTVMAK	_ESQLN(de)LTVM(ox)AKPTNWIEGTR_
74	Glycosylation	IPI00315535	Hyaluronidase-2	O35632;Q3UZE4;Q542F2;Q8C309	EGFFNQNITTFYY	_ATPNEGFFNQN(de)ITTFYYDR_
103	Glycosylation	IPI00315535	Hyaluronidase-2	O35632;Q3UZE4;Q542F2;Q8C309	HGGVPQNGSLCAH	_FDAAGTSVHGGVPQN(de)GSLCAHLPM(ox)LK_
356		IPI00316430	tyrosylprotein sulfotransferase 2;Protein-tyrosine sulfotransferase 2	Q3TQN1;O88856;Q3UDH0	PDPIVINNTHRVL	_LGYDPYANPPNYGNPDPIVIN(de)NTHR_
613		IPI00316469	Dolichyl-diphosphooligosaccharide--protein glycosyltransferase subunit STT3B	Q3TDQ1;Q8BGU3	QIAGMANRTTLVD	_VM(ox)SWWDYGYQIAGM(ox)AN(de)R_
253	Glycosylation	IPI00317356	Serum paraoxonase/arylesterase 1	P52430;Q91X30	VYEKHANWTLTPL	_HAN(de)WTLTPLK_
324	Glycosylation	IPI00317356	Serum paraoxonase/arylesterase 1	P52430;Q91X30	TVVYAENGTVLQG	_ITVVYAEN(de)GTVLQGTTVASVYK_
157	Glycosylation	IPI00317488	Heparan-alpha-glucosaminide N-acetyltransferase	Q3UDW8	KFGEFGNYSLLVQ	_FGEFGN(de)YSLLVQHASSGANK_
403	Glycosylation	IPI00318595	Endoplasmic reticulum aminopeptidase 1;Type 1 tumor necrosis factor receptor shedding aminopeptidase regulator	Q9EQH2;Q6GTP5;Q8C4S7;Q8C9W5;Q8CA64	MEVDALNSSHPVS	_CFNAM(ox)EVDALN(de)SSHPVSTPVENPAQIR_
234	Glycosylation	IPI00319509	Aminopeptidase N	P97449;Q3TB69;Q3UP74	AMKAMFNITLIYP	_AM(ox)FN(de)ITLIYPNNLIALSNM(ox)LPK_
114	Glycosylation	IPI00319509	Aminopeptidase N	P97449;Q3TB69;Q3UP74	TVRFTCNQTTDVI	_FTCN(de)QTTDVIIIHSK_
80	Glycosylation	IPI00321190	Sulfated glycoprotein 1;prosaposin isoform C preproprotein;prosaposin isoform A preproprotein;prosaposin isoform D preproprotein;prosaposin isoform F preproprotein;prosaposin isoform E preproprotein	Q61207;Q3UFE8;B2RUD7;Q3TID4;Q3TIT5;Q3TKB2;Q3TKK3;Q3TWE9;Q3TWF9;Q3TWL8;Q3TXP9;Q3U5W2;Q3U825;Q3U897;Q3U8C4;Q8BFQ1;Q3TXJ0;Q3TWM9;Q3UE29;Q3UAS4	GNLLKDNATQEEI	_DN(de)ATQEEILHYLEK_
335		IPI00321375	biotinidase	Q8CIF4	GLTGTGNTTSEMD	_GHLIIAQVATNPQGLTGTGN(de)TTSEM(ox)DPSHR_
105		IPI00321375	biotinidase	Q8CIF4	DGIHGFNFTRTSI	_GVQIIVFPEDGIHGFN(de)FTR_
189		IPI00321375	biotinidase	Q8CIF4	NVVFSDNGTLVDR	_YQFNTNVVFSDN(de)GTLVDR_
307	Glycosylation	IPI00322447	Isoform 1 of Cell adhesion molecule 1;Isoform 2 of Cell adhesion molecule 1;Isoform 3 of Cell adhesion molecule 1;Isoform 4 of Cell adhesion molecule 1;46 kDa protein;Isoform 5 of Cell adhesion molecule 1;Isoform 6 of Cell adhesion molecule 1;Isoform 7 of	Q8R5M8-1;Q8R5M8;Q8R5M8-2;B5L830;Q9QYL4;Q8R5M8-3;Q1WIL9;Q8R5M8-4;Q9QYL3;Q8R5M8-5;Q8R5M8-6;Q8R5M8-7;B5L832;B5L833;B5L834	LFINNLNKTDNGT	_VDDEM(ox)PQHAVLSGPNLFINNLN(de)K_
105	Glycosylation	IPI00322463	Beta-2-glycoprotein 1;Putative uncharacterized protein;17 kDa protein	Q01339;Q6LAL7;Q9CY42	SFEYPKNISFACN	_YTSFEYPKN(de)ISFACNPGFFLN(de)GTSSSK_
117	Glycosylation	IPI00322463	Beta-2-glycoprotein 1;Putative uncharacterized protein;17 kDa protein	Q01339;Q6LAL7;Q9CY42	NPGFFLNGTSSSK	_YTSFEYPKN(de)ISFACNPGFFLN(de)GTSSSK_
153		IPI00322497	Fcgrt protein	Q61559;Q6PKB0	FNPRIGNWTGEWP	_IGN(de)WTGEWPETEIVANLWM(ox)K_
112		IPI00875275	ATP-binding cassette, sub-family A (ABC1), member 8a;ATP-binding cassette sub-family A member 8-A;ATP-binding cassette, sub-family A (ABC1), member 8a	A2AB96;A4PBQ7;A4PBQ8;Q8K442;A2A6R7	ASPNEENMTELIS	_KILASPNEEN(de)M(ox)TELISM(ox)R_
967	Glycosylation	IPI00875275	ATP-binding cassette, sub-family A (ABC1), member 8a;ATP-binding cassette sub-family A member 8-A;Putative uncharacterized protein (Fragment)	A2AB96;A4PBQ7;A4PBQ8;Q8K442;Q3UF86	GDEKNYNFTLACN	_NYN(de)FTLACNTK_
402	Glycosylation	IPI00323134	Cadherin-2;cadherin 2 precursor;94 kDa protein	P15116;Q3UIC2;Q8BSI9;Q6GU11	VDVIVANLTVTDK	_VDVIVAN(de)LTVTDKDQPHTPAWNAAYR_
255	Glycosylation	IPI00330594	C-type lectin domain family 4 member F	P70194	LQHSMDNISAQIQ	_GSLQSANDLSSQTQGFLQHSM(ox)DN(de)ISAQIQTVR_
184		IPI00330680	Transmembrane protein 106B;Tmem106b protein (Fragment)	Q80X71;Q8R5E7	GKARLNNITNIGP	_LNN(de)ITNIGPLDM(ox)K_
79	Glycosylation	IPI00331214	Platelet glycoprotein 4	Q08857;Q3TA14;Q3U6Y9;Q3UAI3;Q3UC79;Q8C6Z4;Q9CT95	PDDVAKNSSKIKV	_QFWIFDVQNPDDVAKN(de)SSK_
198		IPI00331318	Palmitoyl-protein thioesterase;Putative uncharacterized protein	O88531;Q3TAR8;Q3U6J9;Q3U6W3;Q3UB92;Q8VBX5;Q3TEL0	KESVYRNYSIFLA	_N(de)YSIFLADINQER_
325	Glycosylation	IPI00331550	Dipeptidyl-peptidase 2;Dipeptidylpeptidase 7, isoform CRA_d	Q9ET22;Q8R082	LAGLVYNSSGTEP	_ALAGLVYN(de)SSGTEPCYDIYR_
186		IPI00336324	Malate dehydrogenase, cytoplasmic	P14152	NVIIWGNHSSTQY	_NVIIWGN(de)HSSTQYPDVNHAK_
1135	Glycosylation	IPI00342158	Nuclear pore membrane glycoprotein 210;Putative uncharacterized protein	Q9QY81;Q8C5C6	RGLMVGNGSVLGV	_GLM(ox)VGN(de)GSVLGVVQAVDAETGK_
405	Glycosylation	IPI00342158	Nuclear pore membrane glycoprotein 210;Putative uncharacterized protein	Q9QY81;Q8C5C6	VLSSSQNGSYHHI	_IEAVLPAEFFEVLSSSQN(de)GSYHHIR_
78	Glycosylation	IPI00343568	CD180 antigen;CD180 antigen precursor	Q62192;Q3U0U7;Q8C251	TFSRLINLTFLDL	_LIN(de)LTFLDLTR_
9		IPI00348586	Isoform 1 of Transmembrane protein 195;Isoform 3 of Transmembrane protein 195;Isoform 2 of Transmembrane protein 195	Q8BS35-1;Q8BS35;Q8BS35-3;Q8BS35-2	SPGAQDNVSVSQG	_RSPGAQDN(de)VSVSQGM(ox)R_
277	Glycosylation	IPI00378224	Thioredoxin domain-containing protein 15	Q6P6J9	LKIFIFNQTGIEA	_IFIFN(de)Q(de)TGIEAK_
650		IPI00460291	Putative uncharacterized protein;Protein unc-84 homolog B;MKIAA0668 protein (Fragment)	Q3TBU0;Q3U160;Q4QQM3;Q6B4H2;Q8BJS4;Q6A022	PKALSPNSTISSA	_ALSPN(de)STISSAPK_
311	Glycosylation	IPI00381178	Isoform 1 of Liver carboxylesterase 31;similar to Es31 protein isoform 9	Q63880-1;Q63880	ITKKNVNISYTVN	_N(de)VNISYTVNDSFFPQRPQK_
767	Glycosylation	IPI00381303	Lysosomal alpha-mannosidase;mannosidase, alpha, class 2B, member 1 precursor	O09159;Q3TB95;Q3TBM1;Q3UGH3	RPTWTLNQTEPVA	_RDDYRPTWTLN(de)QTEPVAGNYYPVNTR_
497	Glycosylation	IPI00381303	Lysosomal alpha-mannosidase;mannosidase, alpha, class 2B, member 1 precursor	O09159;Q3TB95;Q3TBM1;Q3UGH3	SFCRELNISICPV	_ELN(de)ISICPVSQTSER_
192		IPI00381357	RIKEN cDNA 2310044H10;Isoform 2 of UPF0510 protein INM02;22 kDa protein	Q3TAS6-1;Q3TAS6;Q3TAS6-2	EDLELFNTSVQLR	_GSEVEDEDLELFN(de)TSVQ(de)LRPPSTAPGPETAAFIER_
281	Glycosylation	IPI00387282	Arylacetamide deacetylase	Q99PG0	HLLQFVNWSSLLP	_AM(ox)LLNQHVPM(ox)ESSHLLQFVN(de)WSSLLPERYK_
79	Glycosylation	IPI00387289	Carboxylesterase 3	Q8VCT4	PWSFVKNTTSYPP	_N(de)TTSYPPM(ox)CSQDAVGGQVLSELFTNR_
297	Glycosylation	IPI00387318	Cell cycle control protein 50A;37 kDa protein	Q8VEK0	AGQYFLNITYNYP	_RDDLHPTLPAGQYFLN(de)ITYNYPVHSFDGR_
269	Glycosylation	IPI00396840	Isoform B of Endothelin-converting enzyme 1;Isoform D of Endothelin-converting enzyme 1;Isoform A of Endothelin-converting enzyme 1;Isoform C of Endothelin-converting enzyme 1;similar to Endothelin converting enzyme 1	Q4PZA2-1;Q4PZA2;B1AXF8;Q4PZA2-4;Q4PZA2-2;Q4PZA2-3;Q3TUZ3	SRDYYLNKTENEK	_DYYLN(de)KTENEK_
538	Glycosylation	IPI00396840	Isoform B of Endothelin-converting enzyme 1;Isoform D of Endothelin-converting enzyme 1;Isoform A of Endothelin-converting enzyme 1;Isoform C of Endothelin-converting enzyme 1;similar to Endothelin converting enzyme 1	Q4PZA2-1;Q4PZA2;B1AXF8;Q4PZA2-4;Q4PZA2-2;Q4PZA2-3;Q3TUZ3	NAMRFFNFSWRVT	_FFN(de)FSWR_
165	Glycosylation	IPI00396840	Isoform B of Endothelin-converting enzyme 1;Isoform D of Endothelin-converting enzyme 1;Isoform A of Endothelin-converting enzyme 1;Isoform C of Endothelin-converting enzyme 1	Q4PZA2-1;Q4PZA2;B1AXF8;Q4PZA2-4;Q4PZA2-2;Q4PZA2-3;Q3TUZ3	IKHLLENATASVS	_HLLEN(de)ATASVSEAERK_
315	Glycosylation	IPI00396840	Isoform B of Endothelin-converting enzyme 1;Isoform D of Endothelin-converting enzyme 1;Isoform A of Endothelin-converting enzyme 1;Isoform C of Endothelin-converting enzyme 1;similar to Endothelin converting enzyme 1	Q4PZA2-1;Q4PZA2;B1AXF8;Q4PZA2-4;Q4PZA2-2;Q4PZA2-3;Q3TUZ3	FETALANITIPQE	_LLGGGDEDAIRPQM(ox)QQILDFETALAN(de)ITIPQEK_
141		IPI00405543	Novel anaphylotoxin-like domain containing protein;Putative uncharacterized protein	A2AS37;Q14BD9;Q8BWS8;Q505K6;Q8BWN9	VPIIYDNDSLFVQ	_LEIVPIIYDN(de)DSLFVQTDK_
56		IPI00405543	Novel anaphylotoxin-like domain containing protein;Putative uncharacterized protein	A2AS37;Q14BD9;Q8BWS8;Q505K6;Q8BWN9	RVGAPENVTVQAH	_VGAPEN(de)VTVQAHGHTEAFDTTVSVK_
761		IPI00405742	plexin B2;MKIAA0315 protein	B2RXS4;Q3UH76;Q8K2J5;Q99LF0;Q8CHG6	LQVTLYNCSFGRS	_LQVTLYN(de)CSFGR_
735		IPI00405742	plexin B2;MKIAA0315 protein	B2RXS4;Q3UH76;Q8K2J5;Q99LF0;Q8CHG6	KLSHDGNETLPLH	_LSHDGN(de)ETLPLHLYVK_
1053		IPI00405742	plexin B2;MKIAA0315 protein	B2RXS4;Q3UH76;Q8K2J5;Q99LF0;Q8CHG6	MEYVFYNDTKVVF	_VTVEGM(ox)EYVFYN(de)DTK_
1072		IPI00405742	plexin B2;MKIAA0315 protein	B2RXS4;Q3UH76;Q8K2J5;Q99LF0;Q8CHG6	EEPEAYNLTVLIR	_VVFLSPAVPEEPEAYN(de)LTVLIR_
189	Glycosylation	IPI00652358	Isoform 1 of Arylsulfatase B;Isoform 2 of Arylsulfatase B	P50429-1;P50429;P50429-2;B2RWQ7	APIESLNGTRCAL	_GFDTYFGYLLGSEDYYTHEACAPIESLN(de)GTR_
280	Glycosylation	IPI00652358	Isoform 1 of Arylsulfatase B;Isoform 2 of Arylsulfatase B	P50429-1;P50429;P50429-2;B2RWQ7	MDEAVGNVTKALK	_IYAGM(ox)VSLM(ox)DEAVGN(de)VTK_
959	Glycosylation	IPI00406603	Coagulation factor V;similar to Murine coagulation factor V	O88783;Q8C7H9	NSPQNQNITVPRG	_GSYEIIAAN(de)GEDTDVDKLTNSPQNQN(de)ITVPR_
272		IPI00889954	41 kDa protein;Haptoglobin	Q61646;Q3UBS3	CVVHYENSTVPEK	_CVVHYEN(de)STVPEKK_
280		IPI00889954	41 kDa protein;Haptoglobin	Q61646;Q3UBS3	TVPEKKNLTSPVG	_N(de)LTSPVGVQPILNEHTFCAGLTK_
164		IPI00889954	41 kDa protein;Haptoglobin	Q61646;Q3UBS3	AKNLFLNHSETAS	_N(de)LFLN(de)HSETASAK_
198		IPI00889954	41 kDa protein;Haptoglobin	Q61646;Q3UBS3	KVVLHPNHSVVDI	_VVLHPN(de)HSVVDIGLIK_
327		IPI00556788	Igh protein;Putative uncharacterized protein;Igh protein;Igh protein;Igh protein;Igh protein;Igh protein;Igh protein;Igh protein;Ig gamma-2A chain C region secreted form;Ig gamma-2A chain C region, A allele	Q58E56;P01865;Q5R3X3;Q5R3X4;Q5R3X5;Q5R3X6;Q9D8L4;Q6PJA7;Q66K04;Q505N9;Q569W9;Q6PJB2;Q6PF95;Q6PIP8;P01864;P01863	THREDYNSTLRVV	_EDYN(de)STLR_
394	Glycosylation	IPI00453492	Isoform 2 of Uncharacterized protein KIAA0319-like;Isoform 1 of Uncharacterized protein KIAA0319-like	Q8K135-2;Q8K135;Q8K135-1	HGEGYVNVTVKPE	_VTVDGQNAHGEGYVN(de)VTVKPEPR_
663		IPI00458077	Neutral ceramidase	Q9JHE3;B7ZN55;B9EHG7	PKNSAENQTHQTF	_NSAEN(de)QTHQTFLTVEK_
133	Glycosylation	IPI00459432	Lysosomal protein NCU-G1	Q9JHJ3	LEFDSTNASEGAQ	_LLEFDSTN(de)ASEGAQPPGKPYPPYSLAK_
353	Glycosylation	IPI00460063	Prenylcysteine oxidase;Protein	Q9CQF9;Q3TVT6;Q3UYP2;Q99JK4	FIKGELNSTLFSS	_GELN(de)STLFSSRPK_
2		IPI00461438	Elongation of very long chain fatty acids protein 6	Q920L5	_____MNMSVLTL	_M(ox)N(de)M(ox)SVLTLQEYEFEK_
1234	Glycosylation	IPI00463492	Transmembrane protein 2	Q5FWI3;Q8BS93	PSIISVNGTDFTF	_GDPSIISVN(de)GTDFTFR_
510		IPI00464256	Uncharacterized family 31 glucosidase KIAA1161	Q69ZQ1;B2RU42	VGYQSQNISCFFR	_VGYQSQN(de)ISCFFR_
418	Glycosylation	IPI00466371	Integrin alpha-1	Q3V3R4;Q05DI0;Q3V391;Q8BPT3	QIVIPHNTTFQTE	_ANQIVIPHN(de)TTFQTEPTK_
217	Glycosylation	IPI00466371	Integrin alpha-1;Putative uncharacterized protein	Q3V3R4;Q05DI0;Q3V391;Q8BPT3;Q3URV2	IVQYGANVTHEFN	_QTQVGIVQYGAN(de)VTHEFNLNK_
779	Glycosylation	IPI00466371	Integrin alpha-1	Q3V3R4;Q05DI0;Q3V391;Q8BPT3	RVTLDFNLTNPEN	_VTLDFN(de)LTN(de)PEN(de)GPVLDDALPNSVHGHIPFAK_
88	Glycosylation	IPI00467180	Translocon-associated protein subunit beta	Q9CPW5	RIAPASNVSHTVV	_IAPASN(de)VSHTVVLRPLK_
253		IPI00469218	Lysosomal membrane glycoprotein 1, isoform CRA_a;Lysosome-associated membrane glycoprotein 1	Q3TX84;Q8VH34;Q9DC13;P11438;Q3TA96;Q922T9	AFNISPNDTSSGS	_AFNISPN(de)DTSSGSCGINLVTLK_
98		IPI00469218	Lysosomal membrane glycoprotein 1, isoform CRA_a;Lysosome-associated membrane glycoprotein 1	Q3TX84;Q8VH34;Q9DC13;P11438;Q3TA96;Q922T9	GYLLTLNFTKNTT	_GYLLTLN(de)FTK_
160		IPI00469218	Lysosomal membrane glycoprotein 1, isoform CRA_a;Lysosome-associated membrane glycoprotein 1	Q3TX84;Q8VH34;Q9DC13;P11438;Q3TA96;Q922T9	IRVYMKNVTVVLR	_VYM(ox)KN(de)VTVVLR_
116		IPI00469218	Lysosomal membrane glycoprotein 1, isoform CRA_a;Lysosome-associated membrane glycoprotein 1	Q3TX84;Q8VH34;Q9DC13;P11438;Q3TA96;Q922T9	HMYFTYNLSDTEH	_YSVQHM(ox)YFTYN(de)LSDTEHFPN(de)AISK_
271	Glycosylation	IPI00469307	Alpha-2-macroglobulin receptor-associated protein;Putative uncharacterized protein	P55302;Q3TL96;Q52KI7;Q5D0B0;Q6PB52;Q6PEM5;Q6ZY49;Q8C252;Q8K295;Q3U8U9	DLAQSANFTEKEL	_VIDLWDLAQSAN(de)FTEK_
154		IPI00469387	GUGU alpha;Fetuin-B;fetuin beta isoform 2	Q6YJU2;Q8CB17;Q9QXC1;Q6YJU1	LYLPAYNCTLRPV	_RVLYLPAYN(de)CTLRPVSK_
664		IPI00471080	Putative uncharacterized protein;69 kDa protein;Protein	Q8VC96;Q9DBD0	CLSNLQNKTTYKT	_DLLFSDDTECLSNLQN(de)K_
444		IPI00471081	Putative phospholipase B-like 1;similar to RIKEN cDNA 1100001H23 gene	Q8VCI0	FRRDQGNVTDMAS	_DQGN(de)VTDM(ox)ASM(ox)K_
125	Glycosylation	IPI00845689	Putative uncharacterized protein;Putative uncharacterized protein	Q9CZL0;Q99KF1;Q3TFU8;Q3U7N8;Q6PDC2;Q8BLM5	QICLHSNSTKFSL	_FTFTSHTPGEHQICLHSN(de)STK_
155	Glycosylation	IPI00621027	Collagen alpha-2(VI) chain;99 kDa protein	Q02788	TDCALANMTQQIR	_RGTFTDCALAN(de)M(ox)TQQIR_
912	Glycosylation	IPI00621027	Collagen alpha-2(VI) chain	Q02788	AFPLTYNVTTIHE	_M(ox)ALLQYGSQNQQQVAFPLTYN(de)VTTIHEALER_
800	Glycosylation	IPI00621027	Collagen alpha-2(VI) chain;99 kDa protein	Q02788	KPQQVRNMTLFSD	_N(de)M(ox)TLFSDLVAEK_
55	Glycosylation	IPI00624663	Alpha-2-macroglobulin;26 kDa protein	Q61838	VSLNHVNETVMLS	_ACVSLN(de)HVNETVM(ox)LSLTLEYAM(ox)QQTK_
568	Glycosylation	IPI00624663	Alpha-2-macroglobulin	Q61838	CFANKVNLSFPSA	_VN(de)LSFPSAQSLPASDTHLK_
1385	Glycosylation	IPI00624663	Alpha-2-macroglobulin	Q61838	TFQIRINVSYTGE	_IN(de)VSYTGERPSSNM(ox)VIVDVK_
1443	Glycosylation	IPI00624663	Alpha-2-macroglobulin	Q61838	YIEKLTNQTLGFS	_LTN(de)QTLGFSFAVEQDIPVK_
104	Glycosylation	IPI00915472	Isoform 3 of Carcinoembryonic antigen-related cell adhesion molecule 1;carcinoembryonic antigen-related cell adhesion molecule 1 isoform 3;carcinoembryonic antigen-related cell adhesion molecule 1 isoform 4;Putative uncharacterized protein CEACAM1a-2C1;Iso	P31809-3;P31809;Q3LFS9;Q61350;Q3LFS8;Q3LFS6;P31809-1;Q925P3;P31809-2;Q03679;Q3LFS7;Q61351;Q61352;Q3LFS5	REIIYSNGSLLFQ	_EIIYSN(de)GSLLFQM(ox)ITM(ox)K_
153		IPI00915472	Isoform 3 of Carcinoembryonic antigen-related cell adhesion molecule 1;carcinoembryonic antigen-related cell adhesion molecule 1 isoform 3;carcinoembryonic antigen-related cell adhesion molecule 1 isoform 4;Putative uncharacterized protein CEACAM1a-2C1	P31809-3;P31809;Q3LFS9;Q61350;Q3LFS8;Q3LFS6	PFLQVTNTTVKEL	_FHVHQPVTQPFLQVTN(de)TTVK_
71	Glycosylation	IPI00915472	Isoform 3 of Carcinoembryonic antigen-related cell adhesion molecule 1;carcinoembryonic antigen-related cell adhesion molecule 1 isoform 3;carcinoembryonic antigen-related cell adhesion molecule 1 isoform 4;Putative uncharacterized protein CEACAM1a-2C1;Iso	P31809-3;P31809;Q3LFS9;Q61350;Q3LFS8;Q3LFS6;P31809-1;Q925P3;P31809-2;Q03679;Q3LFS7;Q61351;Q61352;Q3LFS5	FAWYKGNTTAIDK	_GN(de)TTAIDKEIAR_
717		IPI00674255	Plexin-C1;similar to plexin C1	Q9QZC2;Q8C3X9;Q9CRY9	RVSHVLNDTHMKF	_VSHVLN(de)DTHM(ox)K_
292	Glycosylation	IPI00675799	Collagen alpha-5(VI) chain	A6H584	LQNFLENVTSSVD	_DLQNFLEN(de)VTSSVDVK_
676	Glycosylation	IPI00751912	Probable G-protein coupled receptor 125	Q7TT36;Q3V2C4	THHIPVNVTLRRI	_IDGATVDTHHIPVN(de)VTLR_
276	Glycosylation	IPI00754386	ERO1-like protein alpha	Q8R180;Q3TXL0;Q4FJZ3;Q4FK57	EKKWGHNVTEFQQ	_WGHN(de)VTEFQQR_
1133		IPI00788494	mannose receptor, C type 2 precursor;Isoform 1 of C-type mannose receptor 2	A2AAB0;Q14AX9;Q64449-1;Q64449	AELSYLNHTFRLL	_GTDPSLSPSPAATPPAPGAELSYLN(de)HTFR_
477		IPI00788443	complement factor H-related protein C isoform 1;complement factor H-related protein C isoform 2;complement factor H-related protein C isoform 3	B2RUG5;Q0KHD3;Q0KHD2	RKEFQHNSTMYYK	_EFQHN(de)STM(ox)YYK_
3095		IPI00849818	similar to maltase-glucoamylase;Maltase-glucoamylase	B5THE2;Q6XK23;Q6XK24	DPAISGNETEPYP	_VILILDPAISGN(de)ETEPYPAFTR_
558	Glycosylation	IPI00850413	Isoform 1 of GPI inositol-deacylase	Q3UUQ7-1;Q3UUQ7	HVAQPENDSHVAL	_LHVAQPEN(de)DSHVALLK_
590	Glycosylation	IPI00856221	Sterol regulatory element-binding protein cleavage-activating protein	Q6GQT6	APKLPENQTLPGE	_LPEN(de)QTLPGELPEHAGPAEGVHDSR_
184		IPI00875339	hypothetical protein LOC238395		LNDYVSNQTQGMI	_LLNDYVSN(de)QTQGM(ox)IK_
116		IPI00896605	complement factor I precursor	B2RWX8	AAEGKFNVSLIYG	_FN(de)VSLIYGR_

## Sheet: optimized oxidation buffer
Position	Known Site	Protein	Protein Descriptions	Uniprot	Sequence Window	Modified Sequence
171	Glycosylation	IPI00108041	Stromal interaction molecule 1;Stromal interaction molecule 1, isoform CRA_a	P70302;Q3TUX9;Q8K1E1	PRLAVTNTTMTGT	_LAVTN(de)TTM(ox)TGTVLK_
157	Glycosylation	IPI00108098	CD82 antigen;CD82 antigen	P40237;Q3UII2;A2AIJ1	GWVSHYNWTENEE	_CCGWVSHYN(de)WTENEELM(ox)GFTK_
84	Glycosylation	IPI00108844	Cation-dependent mannose-6-phosphate receptor;ORF 2 protein	P24668;Q3UF03;Q3UKQ5;A2NWD6	VCREASNHSSGAG	_EASN(de)HSSGAGLVQINK_
108	Glycosylation	IPI00108844	Cation-dependent mannose-6-phosphate receptor	P24668;Q3UF03;Q3UKQ5	TVVGRINETHIFN	_IN(de)ETHIFN(de)GSNWIM(ox)LIYK_
114	Glycosylation	IPI00108844	Cation-dependent mannose-6-phosphate receptor	P24668;Q3UF03;Q3UKQ5	NETHIFNGSNWIM	_IN(de)ETHIFN(de)GSNWIM(ox)LIYK_
320	Glycosylation	IPI00108849	CMP-N-acetylneuraminate-beta-galactosamide-alpha-2,3-sialyltransferase;Putative uncharacterized protein	P54751;Q3UU61;Q544T4;Q9JL30;Q8BJX5	DGDFEYNITTTLA	_KTGVHDGDFEYN(de)ITTTLAAINK_
585		IPI00109108	Putative uncharacterized protein	P46978;Q3TG02;Q3TUR1;Q3TVN9;Q3U547;Q3U573;Q3U9H4;Q3UA28;Q5U412;Q8BMP9;Q8BWT4	QITAMANRTILVD	_VM(ox)SWWDYGYQITAM(ox)AN(de)R_
1309		IPI00109612	laminin, beta 2 precursor	Q3USI2;Q8R0Y0	RDGLALNLTLRQL	_DGLALN(de)LTLR_
957	Glycosylation	IPI00110264	Receptor-type tyrosine-protein phosphatase F;Protein tyrosine phosphatase, receptor type, F	A2A8L5;A2A8M1	SQLELQNVTNDTH	_DINSQLELQN(de)VTNDTHLTLLGLKPDTTYDIK_
960	Glycosylation	IPI00110264	Receptor-type tyrosine-protein phosphatase F;Protein tyrosine phosphatase, receptor type, F	A2A8L5;A2A8M1	ELQNVTNDTHLTL	_DINSQLELQN(de)VTNDTHLTLLGLKPDTTYDIK_
721	Glycosylation	IPI00110264	Receptor-type tyrosine-protein phosphatase F;Protein tyrosine phosphatase, receptor type, F	A2A8L5;A2A8M1	VEVEPLNSTAVHV	_KVEVEPLN(de)STAVHVSWK_
941	Glycosylation	IPI00110264	Receptor-type tyrosine-protein phosphatase F;Protein tyrosine phosphatase, receptor type, F	A2A8L5;A2A8M1	RNGHITNYTVVYR	_N(de)GHITN(de)YTVVYR_
110	Glycosylation	IPI00110805	H-2 class I histocompatibility antigen, D-D alpha chain;Isoform 1 of H-2 class I histocompatibility antigen, alpha chain (Fragment);Isoform 2 of H-2 class I histocompatibility antigen, alpha chain (Fragment)	P01900;P01895-1;P01895;P01895-2;Q31154	TALRYYNQSAGGS	_YYN(de)QSAGGSHTLQWM(ox)AGCDVESDGR_
191	Glycosylation	IPI00110852	Translocon-associated protein alpha, muscle specific isoform;Translocon-associated protein subunit alpha;similar to translocon-associated protein alpha, muscle specific	Q52PE3;Q9CY50;A8C1W9;Q3TV94	FQDAVFNQTVTVI	_DLNGN(de)VFQDAVFN(de)QTVTVIER_
136	Glycosylation	IPI00110852	Translocon-associated protein alpha, muscle specific isoform;Translocon-associated protein subunit alpha;similar to translocon-associated protein alpha, muscle specific	Q52PE3;Q9CY50;A8C1W9;Q3TV94	YQFYIQNFTALPL	_YPQDYQFYIQN(de)FTALPLNTVVPPQR_
261	Glycosylation	IPI00404551	Putative uncharacterized protein;Cathepsin D;Putative uncharacterized protein;Protein	Q8C243;P18242;Q05BF3;Q3TIR0;Q3TJN3;Q3TWD0;Q3TWL1;Q3TWR6;Q3TXL5;Q3U651;Q3U7I9;Q3U7P0;Q3U8W5;Q3UAQ1;Q3UC89;Q3UCD9;Q8VCK2;Q3UCW4	GELSYLNVTRKAY	_YYHGELSYLN(de)VTR_
292	Glycosylation	IPI00111163	Ectonucleotide pyrophosphatase/phosphodiesterase family member 5;Enpp5 protein (Fragment)	Q9EQG7;Q5DTL0;Q5FWJ8	LAGAHPNLTVYKK	_EGKFDEVYDALAGAHPN(de)LTVYK_
329	Glycosylation	IPI00111163	Ectonucleotide pyrophosphatase/phosphodiesterase family member 5;Enpp5 protein (Fragment)	Q9EQG7;Q5DTL0;Q5FWJ8	GWYILQNKSDDFL	_VQPIVAVADEGWYILQN(de)K_
427	Glycosylation	IPI00111794	Isoform 1 of Sialate O-acetylesterase;Isoform 2 of Sialate O-acetylesterase	P70665-1;P70665;C3VDI9;C3VDJ0;P70665-2	VAYGEKNLTFQGP	_AVAYGEKN(de)LTFQGPLPK_
293	Glycosylation	IPI00111794	Isoform 1 of Sialate O-acetylesterase;Isoform 2 of Sialate O-acetylesterase;Isoform 3 of Sialate O-acetylesterase	P70665-1;P70665;C3VDI9;C3VDJ0;P70665-2;P70665-3	MIHPLQNMTLKGV	_HSVLWNAM(ox)IHPLQN(de)M(ox)TLK_
1441		IPI00111908	Carbamoyl-phosphate synthase [ammonia], mitochondrial	Q8C196;Q561M8	VINLPNNNTKFVH	_DGSIDLVINLPN(de)NNTK_
470	Glycosylation	IPI00111960	Lysosomal alpha-glucosidase;Glucosidase, alpha, acid	P70699;A2AFL4;A2AFL5	RGVFITNETGQPL	_RGVFITN(de)ETGQPLIGK_
140	Glycosylation	IPI00111960	Lysosomal alpha-glucosidase;Glucosidase, alpha, acid	P70699;A2AFL4;A2AFL3	PSYRLENLSSTES	_LEN(de)LSSTESGYTATLTR_
236	Glycosylation	IPI00112032	Isoform 1 of Carbohydrate kinase domain-containing protein;Isoform 3 of Carbohydrate kinase domain-containing protein;Isoform 2 of Carbohydrate kinase domain-containing protein	Q9CZ42-1;Q9CZ42;Q9CZ42-3;Q9CZ42-2	LSQALGNITVVQK	_LSQALGN(de)ITVVQK_
327		IPI00112322	Putative uncharacterized protein;UDP-glucuronosyltransferase 2B5;MCG131371	Q3UWB9;P17717;Q8K169;Q91WH2	LGSMVSNMTEEKA	_DM(ox)EEFVQSSGDHGVVVFSLGSM(ox)VSN(de)M(ox)TEEK_
489	Glycosylation	IPI00889843	ATP-binding cassette 1, sub-family A, member 1;ATP-binding cassette sub-family A member 1	B1AWZ8;Q8BPY1;P41233	TWREAFNETNQAI	_EAFN(de)ETNQAIQTISR_
1637	Glycosylation	IPI00889843	ATP-binding cassette 1, sub-family A, member 1;ATP-binding cassette sub-family A member 1	B1AWZ8;Q8BPY1;P41233	AFNHPLNLTKQQL	_GENPSQYGITAFNHPLN(de)LTK_
151	Glycosylation	IPI00889843	ATP-binding cassette 1, sub-family A, member 1;ATP-binding cassette sub-family A member 1	B1AWZ8;Q8BPY1;P41233	QDFLVDNETFSGF	_LQDFLVDN(de)ETFSGFLQHN(de)LSLPR_
161	Glycosylation	IPI00889843	ATP-binding cassette 1, sub-family A, member 1;ATP-binding cassette sub-family A member 1	B1AWZ8;Q8BPY1;P41233	SGFLQHNLSLPRS	_LQDFLVDN(de)ETFSGFLQHN(de)LSLPR_
396	Glycosylation	IPI00113057	Plasma kallikrein;plasma kallikrein B1 precursor	P26262;Q8R0P5	RIVGGTNASLGEW	_IVGGTN(de)ASLGEWPWQVSLQVK_
494	Glycosylation	IPI00113057	Plasma kallikrein;plasma kallikrein B1 precursor	P26262;Q8R0P5	KLQTPLNYTEFQK	_LQTPLN(de)YTEFQKPICLPSK_
172	Glycosylation	IPI00113528	Transmembrane 9 superfamily member 3;Putative uncharacterized protein	Q9ET30;Q3UH23;Q571B0;Q8C6F5	NRIVDVNLTSEGK	_IVDVN(de)LTSEGK_
528	Glycosylation	IPI00113539	Fibronectin;Putative uncharacterized protein;Putative uncharacterized protein	P11276;Q3UGY5;Q3UHR1;Q3UZF9;B9EHT6;Q3UH17;Q3UHL6;Q8R3F3;Q9Z1Z8;B7ZNJ1;Q3TBB4;Q3TCF1;Q3TCL7;Q99KD0;Q9Z1Z7	DITYNVNDTFHKR	_DQCIVDDITYN(de)VNDTFHKR_
542	Glycosylation	IPI00113539	Fibronectin;Putative uncharacterized protein;Putative uncharacterized protein	P11276;Q3UGY5;Q3UHR1;Q3UZF9;B9EHT6;Q3UH17;Q3UHL6;Q8R3F3;Q9Z1Z8;B7ZNJ1;Q3TBB4;Q3TCF1;Q3TCL7;Q99KD0;Q9Z1Z7	EEGHMLNCTCFGQ	_RHEEGHM(ox)LN(de)CTCFGQGR_
1243	Glycosylation	IPI00113539	Fibronectin;Putative uncharacterized protein;Putative uncharacterized protein	P11276;Q3UGY5;Q3UHR1;Q3UZF9;B9EHT6;Q3UH17;Q3UHL6;Q8R3F3;Q9Z1Z8;B7ZNJ1;Q3TBB4;Q3TCF1;Q3TCL7;Q99KD0;Q9Z1Z7	NPGLEYNVSVYTV	_ITTTPTN(de)GQQGTSLEEVVHADQSSCTFENLNPGLEYN(de)VSVYTVK_
1006	Glycosylation	IPI00113539	Fibronectin;Putative uncharacterized protein;Putative uncharacterized protein	P11276;Q3UGY5;Q3UHR1;Q3UZF9;B9EHT6;Q3UH17;Q3UHL6;Q8R3F3;Q9Z1Z8;B7ZNJ1;Q3TBB4;Q3TCF1;Q3TCL7;Q99KD0;Q9Z1Z7	TNLQFVNETDRTV	_LDAPTNLQFVN(de)ETDR_
290	Glycosylation	IPI00113750	Vitamin K-dependent protein C	P33587	EILVHPNYTRSSS	_EILVHPN(de)YTR_
554	Glycosylation	IPI00515360	perlecan;similar to perlecan;Basement membrane-specific heparan sulfate proteoglycan core protein	B1B0C7;Q2XQV0;Q3UHH3;Q52KG8;Q5RKM8;Q05793	NDFKGVNVTMPSQ	_GVN(de)VTM(ox)PSQPGVPPLSSTQLQIDPALQEFQLVDLSR_
1129	Glycosylation	IPI00929892	mannosidase 2, alpha 1;Alpha-mannosidase 2	B9EHS6;Q8C4L1;P27046	SPPDAQNMSEVSL	_FAVESLVPSSLSLM(ox)HSPPDAQN(de)M(ox)SEVSLSPM(ox)EISTFR_
93	Glycosylation	IPI00929892	mannosidase 2, alpha 1;Alpha-mannosidase 2	B9EHS6;Q8C4L1;P27046	PRGSPGNASQGSI	_GSPGN(de)ASQGSIHLHSPQLALQADPR_
797		IPI00114065	Complement component 2;Complement component 2;complement factor B isoform 1;complement factor B isoform 2	B8JJN0;B8JJM8;P04186;B8JJM5;Q3U925;Q3U9W1;Q3UEG8;B8JJM6;Q3UAS8	DSIGSSNFTGAKR	_KIVLDPSGSM(ox)NIYLVLDGSDSIGSSN(de)FTGAK_
122	Glycosylation	IPI00114206	Prothrombin (Fragment)	P19221;A2AGT7;Q3TJ94	NYLGTVNVTHTGI	_CAM(ox)DLGVNYLGTVN(de)VTHTGIQCQLWR_
144	Glycosylation	IPI00114206	Prothrombin (Fragment)	P19221;A2AGT7;Q3TJ94	PHKPEINSTTHPG	_YPHKPEIN(de)STTHPGADLK_
72	Glycosylation	IPI00114256	Isoform 1 of Synaptophysin-like protein 1;Isoform 2 of Synaptophysin-like protein 1;9 kDa protein	O09117-1;O09117;Q3U4T9;O09117-2;Q3TVX7	KVGVNKNQTVTAT	_VGVNKN(de)QTVTATFGYPFR_
121	Glycosylation	IPI00114319	Extracellular superoxide dismutase [Cu-Zn]	O09164;O88592;Q3UM12;Q542X9;Q64466	GFPAEQNASNRAI	_LEAYFSLEGFPAEQN(de)ASNR_
82	Glycosylation	IPI00114457	Transforming growth factor beta-1	P04202;Q3UNK5	AVLALYNSTRDRV	_LASPPSQGEVPPGPLPEAVLALYN(de)STR_
298		IPI00930882	solute carrier family 3, member 2 isoform a;4F2 cell-surface antigen heavy chain	Q3TN39;Q8BTJ9;P10852;Q3TIP1;Q3U144;Q60849	YLAEWQNITKNLS	_LM(ox)NAPLYLAEWQN(de)ITK_
168	Glycosylation	IPI00114958	Isoform HMW of Kininogen-1;Isoform 3 of Kininogen-1;51 kDa protein;Isoform LMW of Kininogen-1;15 kDa protein	O08677-1;O08677;O08677-3;O08677-2	SIEHFNNNTDHSH	_HSIEHFN(de)NNTDHSHLFTLR_
242	Glycosylation	IPI00114958	Isoform HMW of Kininogen-1;Isoform 3 of Kininogen-1;51 kDa protein;Isoform LMW of Kininogen-1	O08677-1;O08677;O08677-3;O08677-2	INNKIANFSQSCT	_IAN(de)FSQSCTLYSGDDLVEALPKPCPGCPR_
160	Glycosylation	IPI00115458	Tubulointerstitial nephritis antigen-like;Lcn7 protein	Q99JR5;A3KFW2;Q4FJX7	YGWQAGNHSAFWG	_GNYGWQAGN(de)HSAFWGM(ox)TLDEGIR_
77	Glycosylation	IPI00115458	Tubulointerstitial nephritis antigen-like;Lcn7 protein	Q99JR5;A3KFW2;Q4FJX7	YCDLFCNRTVSDC	_GRADECALPYLGATCYCDLFCN(de)R_
5	Glycosylation	IPI00115482	Sodium/bile acid cotransporter;Sodium-taurocholate cotransporting polypeptide (Fragment)	O08705;O35940;Q91XS4	__MEAHNVSAPFN	_(ac)M(ox)EAHN(de)VSAPFN(de)FSLPPGFGHR_
11	Glycosylation	IPI00115482	Sodium/bile acid cotransporter;Sodium-taurocholate cotransporting polypeptide (Fragment)	O08705;O35940;Q91XS4	NVSAPFNFSLPPG	_(ac)M(ox)EAHN(de)VSAPFN(de)FSLPPGFGHR_
198	Glycosylation	IPI00115510	Inhibin beta E chain;inhibin beta E precursor	O08717;Q91XH3	FRPLDLNSTAAGL	_LQLEFRPLDLN(de)STAAGLPR_
416	Glycosylation	IPI00115516	EMILIN-1;Putative uncharacterized protein	Q99K41;Q3U254;Q3USG5;Q3UUU0	RLEDRFNSTLGPS	_LEDRFN(de)STLGPSEEQEKNWPGGPGR_
795	Glycosylation	IPI00115516	EMILIN-1;Putative uncharacterized protein	Q99K41;Q3U254;Q3USG5;Q3UUU0	RRLGALNNSLLLL	_LGALN(de)NSLLLLEDR_
162	Glycosylation	IPI00115599	Corticosteroid 11-beta-dehydrogenase isozyme 1;Putative uncharacterized protein;25 kDa protein	P50172;Q4JHD9;Q3TJI8	PMLKQSNGSIAVI	_VM(ox)EVNFLSYVVM(ox)STAALPM(ox)LKQSN(de)GSIAVISSLAGK_
171	Glycosylation	IPI00115626	Lipid phosphate phosphohydrolase 3	Q99JY8;B1ASM1	PDFSQINCSEGYI	_LRPHFLSVCDPDFSQIN(de)CSEGYIQNYR_
117	Glycosylation	IPI00877308	desmoglein 2 precursor;Desmoglein-2;Dsg2 protein;Dsg2 protein	A2RRJ0;O55111;Q811I1;Q8BK55;Q8VCE3	RNTGELNITSILD	_NTGELN(de)ITSILDREETPYFLLTGYALDSR_
612	Glycosylation	IPI00115976	Integrin alpha-5;integrin alpha 5 preproprotein	P11688;Q3U7M6;Q80YP5	PIHIALNFSLDPK	_LSPIHIALN(de)FSLDPK_
320	Glycosylation	IPI00116105	Corticosteroid-binding globulin;23 kDa protein	Q06770;Q3UKW1	IKDLFTNQSDFAD	_FSM(ox)SDTYDLQDVLADVGIKDLFTN(de)QSDFADTTK_
89	Glycosylation	IPI00116105	Corticosteroid-binding globulin;Serine (Or cysteine) peptidase inhibitor, clade A, member 6	Q06770;Q3UKW1;Q91WQ0	LENLGFNMSKMSE	_GSTQYLENLGFN(de)M(ox)SK_
217	Glycosylation	IPI00116105	Corticosteroid-binding globulin;Serine (Or cysteine) peptidase inhibitor, clade A, member 6	Q06770;Q3UKW1;Q91WQ0	EEDFYVNETSTVK	_LPFSPENTREEDFYVN(de)ETSTVK_
232	Glycosylation	IPI00116105	Corticosteroid-binding globulin;Serine (Or cysteine) peptidase inhibitor, clade A, member 6	Q06770;Q3UKW1;Q91WQ0	MMVQSGNISYFRD	_VPM(ox)M(ox)VQSGN(de)ISYFR_
383	Glycosylation	IPI00116921	Scavenger receptor class B member 1;56 kDa protein;19 kDa protein	Q61009;Q3TZ42;Q4FK30	VTGIPMNCSVKMQ	_EHSLFLDIHPVTGIPM(ox)N(de)CSVK_
310	Glycosylation	IPI00116921	Scavenger receptor class B member 1;56 kDa protein;19 kDa protein	Q61009;Q3TZ42;Q4FK30	PDTLFANGSVYPP	_FTAPDTLFAN(de)GSVYPPNEGFCPCR_
757	Glycosylation	IPI00605187	ceruloplasmin isoform a;Putative uncharacterized protein;Ceruloplasmin	Q2F3J4;Q8BV37;Q8BU82;Q61147	HHLQEQNVSNVFL	_ELHHLQEQN(de)VSNVFLDKEEFFIGSK_
138	Glycosylation	IPI00605187	ceruloplasmin isoform a;Putative uncharacterized protein;Ceruloplasmin	Q2F3J4;Q8BV37;Q8BU82;Q61147	GAVYPDNTTDFQR	_EYEGAVYPDN(de)TTDFQR_
275	Glycosylation	IPI00117957	Asporin	Q99MQ4;A6H6K1;Q9CTL6	RITDIENGTFANI	_ITDIEN(de)GTFANIPR_
37	Glycosylation	IPI00118069	Tissue factor;Coagulation factor III	P20352;Q8R3Q1;Q6RFS9	IPEKAFNLTWIST	_AFN(de)LTWISTDFK_
104	Glycosylation	IPI00118130	Alpha-1-acid glycoprotein 1	Q60590;Q60839;Q61613;Q91X23	LGFQRENGTFSKY	_EN(de)GTFSKYEGGVETFAHLIVLR_
94	Glycosylation	IPI00118130	Alpha-1-acid glycoprotein 1	Q60590;Q60839;Q61613;Q91X23	GDQCVYNSTHLGF	_ESQTIGDQCVYN(de)STHLGFQR_
76	Glycosylation	IPI00118130	Alpha-1-acid glycoprotein 1	Q60590;Q60839;Q61613;Q91X23	LTTNLINDTIELR	_QAIQTM(ox)QSEFFYLTTNLIN(de)DTIELR_
104	Glycosylation	IPI00118168	Cd163 protein;Isoform 2 of Scavenger receptor cysteine-rich type 1 protein M130;CD163 antigen	Q2VLH6-1;Q2VLH6;B7ZMW6;Q2VLH6-2;A6H691	KALGWANSSAGSG	_ALGWAN(de)SSAGSGYIWM(ox)DK_
173	Glycosylation	IPI00122122	Complement component C8 gamma chain;Complement component 8, gamma subunit, isoform CRA_b	Q8VCG4;A2AJ34;Q9DAC2	RRVREANLTEDQI	_EAN(de)LTEDQILFFPK_
611	Glycosylation	IPI00118674	Nicastrin;nicastrin precursor	P57716;Q3T9E5;Q3TD54;Q3TDE4;Q3TV74;Q6ZQF2	QGPWNSNRTERLP	_DLYEYSWVQGPWNSN(de)R_
54	Glycosylation	IPI00118674	Nicastrin;nicastrin precursor	P57716;Q3T9E5;Q3TD54;Q3TDE4;Q3TV74;Q6ZQF2	PCVRLLNATHQIG	_LLN(de)ATHQIGCQSSISGDTGVIHVVEKEEDLK_
463	Glycosylation	IPI00118674	Nicastrin;nicastrin precursor	P57716;Q3T9E5;Q3TD54;Q3TDE4;Q3TV74;Q6ZQF2	DTAENINVTYPEW	_YYQSIYDTAENIN(de)VTYPEWQSPEEDLNFVTDTAK_
297	Glycosylation	IPI00119019	coagulation factor XI precursor;Coagulation factor XI	Q9DAT3;Q91Y47	CHPSFYNDTDFLG	_HSVPVFCHPSFYN(de)DTDFLGEELDIVDVK_
490	Glycosylation	IPI00119019	coagulation factor XI precursor;Coagulation factor XI	Q9DAT3;Q91Y47	KLESAMNYTDFQR	_LESAM(ox)N(de)YTDFQRPICLPSK_
153	Glycosylation	IPI00119039	Isoform 1 of Protein canopy homolog 3;Isoform 2 of Protein canopy homolog 3	Q9DAU1-1;Q9DAU1;B0V2V2;Q9DAU1-2	IPYELWNETSAEV	_VVM(ox)DIPYELWN(de)ETSAEVADLKK_
1646	Glycosylation	IPI00119063	Prolow-density lipoprotein receptor-related protein 1	Q91ZX7;Q3U454;Q811K6;Q8C4T5	IKRAFINGTGVET	_RAFIN(de)GTGVETVVSADLPNAHGLAVDWVSR_
1512	Glycosylation	IPI00119063	Prolow-density lipoprotein receptor-related protein 1	Q91ZX7;Q3U454;Q811K6;Q8C4T5	NKWTGHNVTVVQR	_WTGHN(de)VTVVQR_
447	Glycosylation	IPI00119063	Prolow-density lipoprotein receptor-related protein 1;Putative uncharacterized protein	Q91ZX7;Q3U454;Q811K6;Q8C4T5;Q3U5J2	IRVNRFNSTEYQV	_VNRFN(de)STEYQVVTR_
1559	Glycosylation	IPI00119063	Prolow-density lipoprotein receptor-related protein 1	Q91ZX7;Q3U454;Q811K6;Q8C4T5	LCLINYNRTVSCA	_GPCSHLCLINYN(de)R_
3954	Glycosylation	IPI00119063	Prolow-density lipoprotein receptor-related protein 1	Q91ZX7;Q3U454;Q811K6;Q8C4T5	RGVTHLNISGLKM	_GVTHLN(de)ISGLK_
3049	Glycosylation	IPI00119063	Prolow-density lipoprotein receptor-related protein 1	Q91ZX7;Q3U454;Q811K6;Q8C4T5	LNLDGSNYTLLKQ	_LNLDGSN(de)YTLLK_
1764	Glycosylation	IPI00119063	Prolow-density lipoprotein receptor-related protein 1	Q91ZX7;Q3U454;Q811K6;Q8C4T5	YWISSGNHTINRC	_LYWISSGN(de)HTINR_
1724	Glycosylation	IPI00119063	Prolow-density lipoprotein receptor-related protein 1	Q91ZX7;Q3U454;Q811K6;Q8C4T5	YWTDGDNISMANM	_LYWTDGDN(de)ISM(ox)ANM(ox)DGSN(de)HTLLFSGQK_
1734	Glycosylation	IPI00119063	Prolow-density lipoprotein receptor-related protein 1	Q91ZX7;Q3U454;Q811K6;Q8C4T5	ANMDGSNHTLLFS	_LYWTDGDN(de)ISM(ox)ANM(ox)DGSN(de)HTLLFSGQK_
3090	Glycosylation	IPI00119063	Prolow-density lipoprotein receptor-related protein 1	Q91ZX7;Q3U454;Q811K6;Q8C4T5	IRRMHLNGSNVQV	_RM(ox)HLN(de)GSNVQVLHR_
240	Glycosylation	IPI00119063	Prolow-density lipoprotein receptor-related protein 1;Putative uncharacterized protein;31 kDa protein	Q91ZX7;Q3U454;Q811K6;Q8C4T5;Q3U5J2	MDFSYANETVCWV	_QTTAM(ox)DFSYAN(de)ETVCWVHVGDSAAQTQLK_
151	Glycosylation	IPI00119095	Ganglioside GM2 activator	Q60648;Q5F1Z8	YSLPTSNFTVPDL	_EGTYSLPTSN(de)FTVPDLELPSWLSTGNYR_
164	Glycosylation	IPI00119299	Isoform 1 of Leukemia inhibitory factor receptor;Isoform 2 of Leukemia inhibitory factor receptor	P42703-1;P42703;Q3U234;Q3UKU5;P42703-2	ALPHPSNATWEIK	_GSALPHPSN(de)ATWEIK_
567	Glycosylation	IPI00119299	Isoform 1 of Leukemia inhibitory factor receptor;Isoform 2 of Leukemia inhibitory factor receptor	P42703-1;P42703;Q3U234;Q3UKU5;P42703-2	GKILSYNVSCSLN	_ILSYN(de)VSCSLNEETQSVLEIFDPQHR_
675	Glycosylation	IPI00119299	Isoform 1 of Leukemia inhibitory factor receptor;Isoform 2 of Leukemia inhibitory factor receptor	P42703-1;P42703;Q3U234;Q3UKU5;P42703-2	WRKVPSNSTETVI	_KVPSN(de)STETVIESDQFQPGVR_
402	Glycosylation	IPI00119299	Isoform 1 of Leukemia inhibitory factor receptor;Isoform 2 of Leukemia inhibitory factor receptor	P42703-1;P42703;Q3U234;Q3UKU5;P42703-2	PGQEIHNFTLTGR	_LGVQM(ox)HPGQEIHN(de)FTLTGR_
142		IPI00119522	Carboxypeptidase N subunit 2	Q9DBB9;Q642I5	SAHIFSNLSSLEK	_LQDLEITGSPVSNLSAHIFSN(de)LSSLEK_
69	Glycosylation	IPI00119809	Galectin-3-binding protein	Q07797	RALGYENATQALG	_ALGYEN(de)ATQALGR_
81		IPI00312711	inter alpha-trypsin inhibitor, heavy chain 4 isoform 1;inter alpha-trypsin inhibitor, heavy chain 4 isoform 2;Inter alpha-trypsin inhibitor, heavy chain 4	O54882;Q505P8;Q8C7G9;Q8C7K5;Q91W60;Q9DBK8;A6X935	RKAFITNFSMIID	_KAFITN(de)FSM(ox)IIDGVTYPGVVK_
874		IPI00312711	inter alpha-trypsin inhibitor, heavy chain 4 isoform 1;inter alpha-trypsin inhibitor, heavy chain 4 isoform 2;Inter alpha-trypsin inhibitor, heavy chain 4	O54882;Q505P8;Q8C7G9;Q8C7K5;Q91W60;Q9DBK8;A6X935	GLMLLLNDTQHFS	_GLM(ox)LLLN(de)DTQHFSNNVK_
207		IPI00312711	inter alpha-trypsin inhibitor, heavy chain 4 isoform 1;inter alpha-trypsin inhibitor, heavy chain 4 isoform 2;Inter alpha-trypsin inhibitor, heavy chain 4	O54882;Q505P8;Q8C7G9;Q8C7K5;Q91W60;Q9DBK8;A6X935	ALTTSQNKTKAHI	_HLQM(ox)DIYIFEPQGISILETESTFM(ox)TPELANALTTSQN(de)K_
577		IPI00312711	inter alpha-trypsin inhibitor, heavy chain 4 isoform 1;inter alpha-trypsin inhibitor, heavy chain 4 isoform 2;Inter alpha-trypsin inhibitor, heavy chain 4	O54882;Q505P8;Q8C7G9;Q8C7K5;Q91W60;Q9DBK8;A6X935	LEAQVLNLSLKYN	_ISASGAELEALEAQVLN(de)LSLK_
517		IPI00312711	inter alpha-trypsin inhibitor, heavy chain 4 isoform 1;inter alpha-trypsin inhibitor, heavy chain 4 isoform 2;Inter alpha-trypsin inhibitor, heavy chain 4	O54882;Q505P8;Q8C7G9;Q8C7K5;Q91W60;Q9DBK8;A6X935	GQMHMQNITFQTE	_VSGQM(ox)HM(ox)QN(de)ITFQTEASVAQQEK_
225	Glycosylation	IPI00120155	Interleukin-6 receptor subunit beta	Q00560;Q3TDT5;Q3UQA0;Q6PDI9	KPTPPYNLSVTNS	_VKPTPPYN(de)LSVTNSEELSSILK_
166	Glycosylation	IPI00120187	Fibromodulin	P50608;Q543D2;Q7TPZ1;Q8BNU3	LYLDHNNLTRMPG	_LYLDHN(de)NLTR_
201	Glycosylation	IPI00120187	Fibromodulin	P50608;Q543D2;Q7TPZ1;Q8BNU3	ALEGLENLTALYL	_VPNNALEGLEN(de)LTALYLHHNEIQEVGSSM(ox)R_
415	Glycosylation	IPI00120222	Ephrin type-A receptor 1	Q60750;Q6IR19	GLEPYANYTFTVK	_GVHFSPAASGLTTSTVQVQGLEPYAN(de)YTFTVK_
941	Glycosylation	IPI00120674	Putative uncharacterized protein;Isoform 1 of Integrin alpha-M;integrin alpha M isoform 2 precursor;Putative uncharacterized protein;Isoform 2 of Integrin alpha-M	Q3U1U4;Q3UJ88;P05555-1;P05555;Q3U1W4;Q3U3F0;Q3U4I5;Q3TD86;Q3TBT0;P05555-2;A1E2I0	SSIRYLNFTASEM	_YLN(de)FTASEM(ox)TSK_
66	Glycosylation	IPI00120832	Major urinary protein 3;Mup3 protein;major urinary protein 26	P04939;Q3KQQ2;A9R9V7;Q80YX8	MRAFVENITVLEN	_AFVEN(de)ITVLENSLVFK_
107		IPI00120856	Isoform 1 of CD302 antigen;Isoform 2 of CD302 antigen	Q9DCG2-1;Q9DCG2;A2AW85;Q9DCG2-2;A2AW84	KWYDHSNMTFDKW	_WYDHSN(de)M(ox)TFDKWADQDGEDLVDTCGFLYTK_
323	Glycosylation	IPI00121114	Serum paraoxonase/lactonase 3	Q62087;Q4FZK0;Q99JS7	STLYANNGSVLQG	_VSTLYAN(de)N(de)GSVLQGSTVASVYHK_
444	Glycosylation	IPI00121190	Epidermal growth factor receptor;epidermal growth factor receptor isoform 2	Q01279;Q3TQS6;Q5SVE8;Q9EP98;Q8VHI0;Q9EQR1;Q9ERV6;Q9WVF5	LAVVGLNITSLGL	_QHGQFSLAVVGLN(de)ITSLGLR_
187		IPI00121240	apolipoprotein N	Q8BUM4	FKASVVNVTQHCT	_ASVVN(de)VTQHCTM(ox)ESWESM(ox)NEVAR_
184		IPI00121312	Fibrinogen-like protein 1	Q71KU9;Q0P684	LTDFEKNSSFAQY	_IDLTDFEKN(de)SSFAQYQSFK_
185	Glycosylation	IPI00316159	Junctional adhesion molecule A;F11 receptor precursor	O88792;Q8VC39	KTRAFMNSSFTID	_AFM(ox)N(de)SSFTIDPK_
167	Glycosylation	IPI00121378	CD166 antigen	Q61490;Q3TTY3;Q54AJ5;Q5MPX5	DSYPDGNITWYRN	_DSYPDGN(de)ITWYR_
480	Glycosylation	IPI00121378	CD166 antigen	Q61490;Q3TTY3;Q54AJ5;Q5MPX5	IISPEENVTLTCT	_IIISPEEN(de)VTLTCTAENQLER_
158	Glycosylation	IPI00121550	Sodium/potassium-transporting ATPase subunit beta-1	P14094;B0LAB6;Q3TRA6;Q3TSQ1;Q3TV47;Q545P0	KLDWLGNCSGLND	_LDWLGN(de)CSGLNDDSYGYR_
266	Glycosylation	IPI00121550	Sodium/potassium-transporting ATPase subunit beta-1	P14094;B0LAB6;Q3TRA6;Q3TSQ1;Q3TV47;Q545P0	LAVQFTNLTVDTE	_YLQPLLAVQFTN(de)LTVDTEIR_
241	Glycosylation	IPI00121627	Cleft lip and palate transmembrane protein 1 homolog	Q8VBZ3	ISHWHPNITINIV	_AEDYGPVEVISHWHPN(de)ITINIVDDHTPWVK_
295	Glycosylation	IPI00121627	Cleft lip and palate transmembrane protein 1 homolog	Q8VBZ3	KDYYPINESLASL	_DYYPIN(de)ESLASLPLR_
51		IPI00944682	signal peptide peptidase-like 2A;Signal peptide peptidase-like 2A	A2AI51;Q9CPY9;Q9CVG0;Q9JJF9	CMYYNNNWTRLPS	_DYCM(ox)YYNNN(de)WTR_
61		IPI00944682	signal peptide peptidase-like 2A;Signal peptide peptidase-like 2A	A2AI51;Q9CPY9;Q9CVG0;Q9JJF9	LPSSLENATSLSL	_LPSSLEN(de)ATSLSLM(ox)N(de)LTGTALCHLSDIPPDGIR_
69		IPI00944682	signal peptide peptidase-like 2A;Signal peptide peptidase-like 2A	A2AI51;Q9CPY9;Q9CVG0;Q9JJF9	TSLSLMNLTGTAL	_LPSSLEN(de)ATSLSLM(ox)N(de)LTGTALCHLSDIPPDGIR_
132	Glycosylation	IPI00230319	Isoform 2 of Solute carrier organic anion transporter family member 1B2;Isoform 1 of Solute carrier organic anion transporter family member 1B2;68 kDa protein	Q9JJL3-2;Q9JJL3;Q9JJL3-1	DISSLHNSTLTCL	_YATENDISSLHN(de)STLTCLVN(de)QTTSLTGTSPEIM(ox)EK_
140	Glycosylation	IPI00230319	Isoform 2 of Solute carrier organic anion transporter family member 1B2;Isoform 1 of Solute carrier organic anion transporter family member 1B2;68 kDa protein	Q9JJL3-2;Q9JJL3;Q9JJL3-1	TLTCLVNQTTSLT	_YATENDISSLHN(de)STLTCLVN(de)QTTSLTGTSPEIM(ox)EK_
426		IPI00874858	alpha-1,6-mannosyltransferase ALG12 isoform 1;alpha-1,6-mannosyltransferase ALG12 isoform 2	Q8VDB2;Q3UQK8;Q8VCA2	GAAAMLNYTHILM	_YDKSEDVGAAAM(ox)LN(de)YTHILM(ox)EAVPGHPALYR_
163		IPI00122117	coagulation factor XIII, beta subunit	Q07968;B1AY02;Q3UER0;Q8K0W0	PELEHGNYSTTQR	_KEQETCLAPELEHGN(de)YSTTQR_
335	Glycosylation	IPI00122257	5'-nucleotidase;Putative uncharacterized protein	Q61503;Q0VEE0;Q8C8G9	WRIKLDNYSTQEL	_IKLDN(de)YSTQELGR_
313	Glycosylation	IPI00122257	5'-nucleotidase;Putative uncharacterized protein	Q61503;Q0VEE0;Q8C8G9	GNPILLNSSIPED	_VEFDDKGNVITSYGNPILLN(de)SSIPEDATIK_
120	Glycosylation	IPI00122293	Prolargin	Q9JK53;Q543S0;Q8CAZ9	PLESFQNATGLRW	_IHYLYLQNNFITELPLESFQN(de)ATGLR_
323	Glycosylation	IPI00122293	Prolargin	Q9JK53;Q543S0;Q8CAZ9	NSIEKINGTQICP	_IN(de)GTQICPNNLVAFHDFSSDLENVPHLR_
184	Glycosylation	IPI00816869	Isoform a of P2X purinoceptor 4;purinergic receptor P2X4;Isoform c of P2X purinoceptor 4	Q9JJX6-1;Q9JJX6;Q3TR36;Q3UCX4;Q9Z257;Q9JJX6-3	FLKAAENFTLLVK	_AAEN(de)FTLLVK_
75	Glycosylation	IPI00816869	Isoform a of P2X purinoceptor 4;purinergic receptor P2X4;Isoform c of P2X purinoceptor 4;Isoform b of P2X purinoceptor 4;P2X purinoceptor;Isoform d of P2X purinoceptor 4	Q9JJX6-1;Q9JJX6;Q3TR36;Q3UCX4;Q9Z257;Q9JJX6-3;Q9JJX6-2;Q9Z256;Q9JJX6-4;Q9WUN9	KGVAVTNTSQLGF	_GVAVTN(de)TSQLGFR_
208	Glycosylation	IPI00816869	Isoform a of P2X purinoceptor 4;purinergic receptor P2X4;Isoform c of P2X purinoceptor 4;Isoform b of P2X purinoceptor 4;P2X purinoceptor;Isoform d of P2X purinoceptor 4	Q9JJX6-1;Q9JJX6;Q3TR36;Q3UCX4;Q9Z257;Q9JJX6-3;Q9JJX6-2;Q9Z256;Q9JJX6-4;Q9WUN9	KRNILPNITTSYL	_NILPN(de)ITTSYLK_
673	Glycosylation	IPI00122399	Golgi apparatus protein 1	Q61543;Q3TMG0;Q53WR6;Q8BQH1	CRDIVGNLTELES	_DIVGN(de)LTELESEDIQIEALLM(ox)R_
311		IPI00122557	esterase 31-like isoform 1;Isoform 2 of Liver carboxylesterase 31-like	Q8VCU1-1;Q8VCU1;Q8VCU1-2	IKQKNVNISYIVN	_QKNVN(de)ISYIVNDSFFPQRPEK_
362	Glycosylation	IPI00122973	Isoform 1 of Intercellular adhesion molecule 1;Isoform 2 of Intercellular adhesion molecule 1	P13597-1;P13597;Q3TB10;Q3TB21;Q3THH5;Q3U7Q9;Q3U7T2;Q3U8M7;Q3UAU5;Q3UDC5;Q3UDJ5;Q3UE52;Q4FK06;Q922B3;P13597-2	QVQFTLNASSEDH	_VVLLSGVEPRPPTPQVQFTLN(de)ASSEDHKR_
243	Glycosylation	IPI00881377	serine (or cysteine) proteinase inhibitor, clade G, member 1 precursor;Plasma protease C1 inhibitor;Serine (Or cysteine) proteinase inhibitor, clade G, member 1	A2ATR7;P97290;A2ATR8	IRDTYVNASQSLY	_DTYVN(de)ASQSLYGSSPR_
75	Glycosylation	IPI00881377	serine (or cysteine) proteinase inhibitor, clade G, member 1 precursor;Plasma protease C1 inhibitor;Serine (Or cysteine) proteinase inhibitor, clade G, member 1	A2ATR7;P97290;A2ATR8	VAITITNDTMGKV	_ESFPERDDSWSPPEPTVLPSTWPTTSVAITITN(de)DTM(ox)GK_
356	Glycosylation	IPI00881377	serine (or cysteine) proteinase inhibitor, clade G, member 1 precursor;Plasma protease C1 inhibitor	A2ATR7;P97290	QLQLSHNLSFVIV	_VGQLQLSHN(de)LSFVIVVPVFPK_
461	Glycosylation	IPI00123040	Receptor-type tyrosine-protein phosphatase kappa	P35822;B2RRF0;Q8C462;Q8C5G0;Q8C819;Q99KV5	HLPPYTNVSLKMI	_APQHVVN(de)HLPPYTN(de)VSLK_
415	Glycosylation	IPI00123040	Receptor-type tyrosine-protein phosphatase kappa	P35822;B2RRF0;Q8C462;Q8C5G0;Q8C819;Q99KV5	WESLGYNITRCHT	_IAVDWESLGYN(de)ITR_
312	Glycosylation	IPI00123194	Biglycan	P28653;Q3TAF9;Q3TNY9;Q3UXK8;Q7TMW3	VYLHSNNITKVGI	_LLQVVYLHSN(de)NITK_
271	Glycosylation	IPI00123194	Biglycan	P28653;Q3TAF9;Q3TNY9;Q3UXK8;Q7TMW3	QIRMIENGSLSFL	_M(ox)IEN(de)GSLSFLPTLR_
206	Glycosylation	IPI00123196	Decorin	P28654;Q3TSV1;Q3UKR1;Q6LAK9	IRISDTNITAIPQ	_ISDTN(de)ITAIPQGLPTSLTEVHLDGNK_
257	Glycosylation	IPI00123196	Decorin	P28654;Q3TSV1;Q3UKR1;Q6LAK9	SITVMENGSLANV	_LGLSFN(de)SITVM(ox)EN(de)GSLANVPHLR_
294	Glycosylation	IPI00123223	Murinoglobulin-1;98 kDa protein	P28665	CSTQEVNITELQS	_EVN(de)SQLDN(de)NGCSTQEVN(de)ITELQSK_
749	Glycosylation	IPI00123223	Murinoglobulin-1;98 kDa protein	P28665	WDIVTVNSTGLAE	_KYFPETWVWDIVTVN(de)STGLAEVEM(ox)TVPDTITEWK_
313	Glycosylation	IPI00123223	Murinoglobulin-1;98 kDa protein	P28665	VQLFHVNATVTEE	_N(de)YEVQLFHVN(de)ATVTEEGTGLEFSR_
993	Glycosylation	IPI00123223	Murinoglobulin-1	P28665	YVLKYLNETQQLT	_YLN(de)ETQQLTQKIKTK_
931	Glycosylation	IPI00123342	Hypoxia up-regulated protein 1	Q9JKR6;Q8VCI2	RAEPPLNASAGDQ	_AEPPLN(de)ASAGDQEEK_
155	Glycosylation	IPI00123342	Hypoxia up-regulated protein 1	Q9JKR6;Q8VCI2	VLGMVLNYSRSLA	_FQISPQLQFSPEEVLGM(ox)VLN(de)YSR_
596	Glycosylation	IPI00123342	Hypoxia up-regulated protein 1	Q9JKR6;Q8VCI2	SSDAKENGTDAVQ	_LGNTISSLFGGGTSSDAKEN(de)GTDAVQEEEESPAEGSK_
830	Glycosylation	IPI00123342	Hypoxia up-regulated protein 1	Q9JKR6;Q8VCI2	ALDNLLNHSSIFL	_LSALDNLLN(de)HSSIFLK_
515	Glycosylation	IPI00123342	Hypoxia up-regulated protein 1	Q9JKR6;Q8VCI2	RVFGSQNLTTVKL	_VFGSQN(de)LTTVK_
91	Glycosylation	IPI00123601	Solute carrier family 22 member 21;Solute carrier family 22 member 5;20 kDa protein;17 kDa protein	Q9WTN6;A2RSK7;Q9Z0E8;Q3USA0;Q5SX17	RLATIANFSELGL	_LATIAN(de)FSELGLEPGR_
530	Glycosylation	IPI00775975	Cadherin 13, isoform CRA_a;Cadherin-13	Q8BG11;Q8BT28;Q8CE18;Q8VDK4;Q9WTR5	LSINPINGTVDTT	_YSIYKDPAGWLSINPIN(de)GTVDTTAVLDR_
380	Glycosylation	IPI00123783	Isoform 1 of Teneurin-3;Isoform 2 of Teneurin-3;284 kDa protein;54 kDa protein	Q9WTS6-1;Q9WTS6;Q9WTS6-2;B7ZNJ5	GGFTHENNTIDSG	_LGGFTHEN(de)NTIDSGELDIGRR_
283	Glycosylation	IPI00757771	44 kDa protein;Isoform 1 of Neuroplastin;Isoform 3 of Neuroplastin;31 kDa protein;Isoform 4 of Neuroplastin	P97300-1;P97300;P97300-3;P97300-4	VFEEISNSSGRFF	_KKEN(de)GVFEEISN(de)SSGR_
101	Glycosylation	IPI00129755	Alpha-1-antitrypsin 1-2;Alpha-1-antitrypsin 1-1;Alpha-1-antitrypsin 1-4;Serpina1a protein;serine (or cysteine) proteinase inhibitor, clade A, member 1c;Alpha-1-antitrypsin 1-3	P22599;P07758;Q00897;Q8VC41;Q3KQQ4;Q00896	LEGLQFNLTQTSE	_GDTHTQILEGLQFN(de)LTQTSEADIHK_
197	Glycosylation	IPI00124221	Sodium/potassium-transporting ATPase subunit beta-3	P97370;Q1WWL1;Q3U9D4;Q3UFH4;Q544Q7;Q71VC6	CLPKEENATIATY	_EEN(de)ATIATYPEFGVLDLK_
124	Glycosylation	IPI00124221	Sodium/potassium-transporting ATPase subunit beta-3	P97370;Q1WWL1;Q3U9D4;Q3UFH4;Q544Q7;Q71VC6	SVEEQKNLTSCPD	_LVEDLESFLKPYSVEEQKN(de)LTSCPDGAPFIQHGPDYR_
398	Glycosylation	IPI00124428	Group XV phospholipase A2	Q8VEB4	HIEMLANATTLAY	_VSLQELPGSEHIEM(ox)LAN(de)ATTLAYLK_
596	Glycosylation	IPI00124666	Semaphorin-4G	Q9WUH7	RALWLLNGSKSLS	_ALWLLN(de)GSK_
55	Glycosylation	IPI00124666	Semaphorin-4G;MKIAA1619 protein (Fragment)	Q9WUH7;Q69ZE7	FKGQTQNYSTLLL	_GQTQN(de)YSTLLLEEASER_
386	Glycosylation	IPI00124666	Semaphorin-4G	Q9WUH7	LRSRGYNSSQDLP	_GYN(de)SSQDLPSLVLDFVK_
730	Glycosylation	IPI00124700	Transferrin receptor protein 1	Q62351;Q542D9;Q8JZS3	KNITAFNETLFRN	_NITAFN(de)ETLFR_
368	Glycosylation	IPI00125182	Bone morphogenetic protein 1;Bone morphogenetic protein 1;MKIAA4159 protein (Fragment)	P98063;Q6P550;Q6NZM2;Q570Z4	GEKIILNFTSMDL	_IILN(de)FTSM(ox)DLYR_
186	Glycosylation	IPI00125220	Cathepsin Z	Q9WUU7;Q545I6;Q9ES94	ECHTIQNYTLWRV	_ECHTIQN(de)YTLWR_
146	Glycosylation	IPI00125310	Complement C1q subcomponent subunit A;complement component 1, q subcomponent, A chain precursor	P98086;Q3TXB1;Q3UBX7;Q9DCM6	QESPYQNHTGRFI	_VLTNQESPYQN(de)HTGR_
256		IPI00262024	ectonucleoside triphosphate diphosphohydrolase 5 isoform a;Ectonucleoside triphosphate diphosphohydrolase 5	Q3TQC7;Q8BR23;Q8CD29;Q9WUZ9;Q544J4	TSFEMFNSTFKLY	_GYLTSFEM(ox)FN(de)STFK_
144		IPI00125813	Dipeptidyl peptidase 4;dipeptidylpeptidase 4 isoform 2	P28843;A2AS84;Q3TR43	TEEKIPNNTQWIT	_QLITEEKIPN(de)NTQWITWSPEGHK_
514	Glycosylation	IPI00125813	Dipeptidyl peptidase 4;dipeptidylpeptidase 4 isoform 2	P28843;A2AS84;Q3TR43	LDFIVLNETRFWY	_LDFIVLN(de)ETR_
83	Glycosylation	IPI00125813	Dipeptidyl peptidase 4;dipeptidylpeptidase 4 isoform 2	P28843;A2AS84;Q3TR43	LNAEHGNSSIFLE	_QENNILLLN(de)AEHGN(de)SSIFLENSTFESFGYHSVSPDR_
248	Glycosylation	IPI00125815	Iduronate 2-sulfatase;iduronate-2-sulfatase isoform a;48 kDa protein;Iduronate 2-sulfatase	Q08890;Q32KI7;Q3V1R8;Q684Q4;Q8CJ15;A2BFN2	KLYPLENITLAPD	_LYPLEN(de)ITLAPDPHVPDSLPPVAYNPWM(ox)DIR_
300	Glycosylation	IPI00828646	lipopolysaccharide-binding protein precursor;Lipopolysaccharide-binding protein;Lipopolysaccharide binding protein	A2AC66;Q61805;A2AC67	HQAGYLNFSITDD	_VYHQAGYLN(de)FSITDDM(ox)LPHDSGIR_
937	Glycosylation	IPI00468674	Integrin alpha 3;Isoform Alpha-3A of Integrin alpha-3;Itga3 protein	Q62470-2;Q62470;Q5SWA8;Q8C8X8;Q62470-1;Q8K4Q3;Q6P6I1	VKARVWNSTFIED	_VWN(de)STFIEDYKDFDR_
104	Glycosylation	IPI00126186	Macrophage mannose receptor 1;mannose receptor, C type 1 precursor	Q61830;Q2HZ94	QKWECKNDTLFGI	_WECKN(de)DTLFGIK_
55	Glycosylation	IPI00126188	Interleukin-6 receptor subunit alpha	P22272;Q3URV7	GKEAAGNVTIHWV	_EAAGN(de)VTIHWVYSGSQNR_
19	Glycosylation	IPI00126253	LAG1 longevity assurance homolog 2;29 kDa protein;26 kDa protein;16 kDa protein	Q924Z4	RLWLPVNLTWADL	_LWLPVN(de)LTWADLEDKDGR_
345	Glycosylation	IPI00126769	Cathepsin F	Q9R013;A4FUP7;Q99KQ9;Q9ES93	GHVQTCNFSAQMA	_NLGGLETEDDYGYQGHVQTCN(de)FSAQM(ox)AK_
356	Glycosylation	IPI00126769	Cathepsin F	Q9R013;A4FUP7;Q99KQ9;Q9ES93	MAKVYINDSVELS	_VYIN(de)DSVELSR_
277		IPI00126966	Major histocompatibility complex class I b;hypothetical protein LOC667977;MHC classIb T5;MCG68121, isoform CRA_b;MHC class I-alpha;41 kDa protein;H-2 class I histocompatibility antigen, D-K alpha chain;MHC H-2K antigen;40 kDa protein;similar to MHC class I	O19440;Q4VCN9;Q6PEB5;Q6QMF2;Q6QMF4;A7VMS6;Q0WXH4;O19441;Q31215;Q66JR0;Q31149;P14426;Q31116;Q95457;Q31141;Q0WXH7;Q0WXI6;Q31152;Q31220;Q3UWA5;Q95H92;P01898;O19454;Q4VCN4;Q4VCP2	PLGKEQNYTCHVY	_EQN(de)YTCHVYHEGLPEPLTLR_
197	Glycosylation	IPI00126966	Major histocompatibility complex class I b;similar to MHC H2-K 24 polypeptide isoform 1;MCG129835, isoform CRA_b;H-2 class I histocompatibility antigen, K-D alpha chain;MHC class I H2-K gene (Fragment);similar to MHC H2-K 24 polypeptide isoform 3;similar t	O19440;Q4VCN9;Q6PEB5;Q6QMF2;Q6QMF4;O35641;Q31148;Q31614;Q31634;Q5KTQ1;Q6RJ37;P01902;Q5KTQ2;Q31191	RYLELGNETLLRT	_YLELGN(de)ETLLR_
316		IPI00127223	MCG1788;30 kDa protein;28 kDa protein;22 kDa protein	B9EIY3;Q3UEC9;Q3UEP4	LGSMVSNMTEEKA	_EM(ox)EDFVQSSGEHGVVVFSLGSM(ox)VSN(de)M(ox)TEEK_
198	Glycosylation	IPI00127407	Procollagen-lysine,2-oxoglutarate 5-dioxygenase 1;Procollagen-lysine, 2-oxoglutarate 5-dioxygenase 1	Q9R0E2;A2A7Z0;Q3TZN4;Q3UE11;Q91Z26;A8Y5E6	EKREQINISLDHR	_EQIN(de)ISLDHR_
539	Glycosylation	IPI00127407	Procollagen-lysine,2-oxoglutarate 5-dioxygenase 1;Procollagen-lysine, 2-oxoglutarate 5-dioxygenase 1	Q9R0E2;A2A7Z0;Q3TZN4;Q3UE11;Q91Z26;A2A7Y9	EKYIHENYTKALA	_YIHEN(de)YTK_
105	Glycosylation	IPI00127447	Lysosome membrane protein 2	O35114;Q3TCS7	NIQFGENGTTISA	_ANIQFGEN(de)GTTISAVTNK_
122	Glycosylation	IPI00127447	Lysosome membrane protein 2	O35114;Q3TCS7	AYVFERNQSVGDP	_AYVFERN(de)QSVGDPNVDLIR_
94	Glycosylation	IPI00127856	Alpha-1-acid glycoprotein 2	P07361	DDHCVYNSTHLGI	_EYHTIDDHCVYN(de)STHLGIQR_
221	Glycosylation	IPI00128154	Cathepsin L1	P06797;Q3TNC8;Q3TT75;Q3TVJ1;Q3U5U9;Q3UHZ4;Q3UWH6;Q543M3;Q6LAF5;Q9D0C0	AEFAVANDTGFVD	_YRAEFAVAN(de)DTGFVDIPQQEK_
156	Glycosylation	IPI00128249	Alpha-2-HS-glycoprotein	P29699;O35399;Q3TIU3;Q3UEK5;Q3UEK9	PLLTPFNDTNVVH	_CPLLTPFN(de)DTNVVHTVNTALAAFNTQN(de)NGTYFK_
99	Glycosylation	IPI00128249	Alpha-2-HS-glycoprotein	P29699;O35399;Q3TIU3;Q3UEK5;Q3UEK9	DPTPLANCSVRQL	_RPFGVVYEM(ox)EVDTLETTCHALDPTPLAN(de)CSVR_
143		IPI00128260	Carboxypeptidase N catalytic chain	Q9JJN5	AAAQGPNMSGYLV	_IHILPSM(ox)NPDGYEVAAAQGPN(de)M(ox)SGYLVGR_
255	Glycosylation	IPI00128989	V-type proton ATPase subunit S1;Putative uncharacterized protein;ATPase, H+ transporting, lysosomal accessory protein	Q9R1Q9;Q3THZ3;Q3TT23;Q3TWN7;Q3UCY7;Q3UWN7;Q571E2;Q8K567;Q3TKX1;B7FAU7	HPPVSYNDTAPRI	_QLLQTQVASPAIHPPVSYN(de)DTAPR_
21	Glycosylation	IPI00129079	Multidrug resistance-associated protein 6	Q9R1S7;A2TAJ0;A2TAJ1	AGLRVWNQTEQEP	_VWN(de)QTEQEPAAYHLLSLCFVR_
241	Glycosylation	IPI00129240	Vitronectin	P29788;Q5SYG4;Q91X32;Q9D080	DPGYPRNISEGFS	_N(de)ISEGFSGIPDNVDAAFALPAHR_
318		IPI00129250	Leucine-rich alpha-2-glycoprotein 1	Q91XL1	NKMFSQNDTRCAG	_M(ox)FSQN(de)DTR_
319	Glycosylation	IPI00554860	lipase A precursor;Lysosomal acid lipase/cholesteryl ester hydrolase	Q3TEL5;Q6PDR1;Q8C2G7;Q9Z0M5	KNYFHYNQSFPPS	_N(de)YFHYN(de)QSFPPSYNIK_
159	Glycosylation	IPI00554860	lipase A precursor;Lysosomal acid lipase/cholesteryl ester hydrolase	Q3TEL5;Q6PDR1;Q8C2G7;Q9Z0M5	SINYILNKTGQEQ	_YDLPASINYILN(de)K_
183		IPI00129485	Fc receptor, IgG, low affinity IIb isoform 1;Isoform IIB1' of Low affinity immunoglobulin gamma Fc region receptor II;Fc receptor, IgG, low affinity IIb isoform 2;Fc receptor, IgG, low affinity III;Low affinity immunoglobulin gamma Fc region receptor III	P08101-1;P08101;P08101-3;P08101-2;P97918;Q7TMW9;Q9ES92;P08508;Q5D5I8;Q5D5J5	FSIPKANHSHSGD	_AN(de)HSHSGDYYCK_
75		IPI00129485	Fc receptor, IgG, low affinity IIb isoform 1;Isoform IIB1' of Low affinity immunoglobulin gamma Fc region receptor II;Fc receptor, IgG, low affinity IIb isoform 2	P08101-1;P08101;P08101-3;P08101-2;P97918	GTHNPGNSSTQWF	_EDTVTLTCEGTHNPGN(de)SSTQWFHN(de)GR_
176		IPI00129485	Fc receptor, IgG, low affinity IIb isoform 1;Isoform IIB1' of Low affinity immunoglobulin gamma Fc region receptor II;Fc receptor, IgG, low affinity IIb isoform 2	P08101-1;P08101;P08101-3;P08101-2;P97918	YHHYSSNFSIPKA	_YHHYSSN(de)FSIPK_
62	Glycosylation	IPI00129526	Endoplasmin	P08113;Q3UAD6;Q3UBU0;Q8C2R2;Q8CCY5;Q91V38;Q9CW12	IQLDGLNASQIRE	_EGSRTDDEVVQREEEAIQLDGLN(de)ASQIR_
217	Glycosylation	IPI00129526	Endoplasmin;Putative uncharacterized protein	P08113;Q3UAD6;Q3UBU0;Q8C2R2;Q8CCY5;Q91V38;Q9CW12;Q3TUD6	VTSKHNNDTQHIW	_HN(de)NDTQHIWESDSNEFSVIADPR_
168	Glycosylation	IPI00129867	Putative uncharacterized protein	O35367;A4FUJ3;Q8C3D9	TFSNLENLTLLDL	_IPQGTFSN(de)LENLTLLDLQHNK_
791		IPI00130010	complement component factor H;Putative uncharacterized protein;125 kDa protein	P06909;Q61848;Q6NZK3;Q8C5S1	LTEFTHNSTMDYK	_LTEFTHN(de)STM(ox)DYK_
275	Glycosylation	IPI00130015	Dipeptidyl-peptidase 1	P97821;Q3TIF1;Q3U8J6;Q3U9B7;Q3UAF5;Q3UBY5;Q8BQL3;Q8C2L5	RIRILTNNSQTPI	_ILTN(de)NSQTPILSPQEVVSCSPYAQGCDGGFPYLIAGK_
226		IPI00130117	integrin alpha 9 isoform a;similar to integrin alpha 9 protein	B8JK39;B9EKC4;Q91YD5	GTLKVLNLTDNTY	_VLN(de)LTDNTYFK_
174	Glycosylation	IPI00130486	FK506-binding protein 9	Q9Z247	FVRYHYNGTFLDG	_YHYN(de)GTFLDGTLFDSSHNR_
286	Glycosylation	IPI00130486	FK506-binding protein 9	Q9Z247	FLRYHYNGTLLDG	_YHYN(de)GTLLDGTLFDSSYSR_
171	Glycosylation	IPI00130573	Carboxypeptidase D;carboxypeptidase D precursor;similar to carboxypeptidase D	O89001;Q5SVH8	RLVRLLNTTDVYL	_LLN(de)TTDVYLLPSLNPDGFER_
402	Glycosylation	IPI00130654	Isoform 3 of Afamin;Isoform 1 of Afamin;Isoform 2 of Afamin	O89020-3;O89020;O89020-1;O89020-2	HVEDKFNETTQRS	_HVEDKFN(de)ETTQR_
221	Glycosylation	IPI00130661	Tripeptidyl-peptidase 1	O89023;Q3TDY6;Q3U2Z6;Q8BNF3	VGSGTTNNSQACA	_DVGSGTTN(de)NSQACAQFLEQYFHNSDLTEFM(ox)R_
209	Glycosylation	IPI00130661	Tripeptidyl-peptidase 1	O89023;Q3TDY6;Q3U2Z6;Q8BNF3	VLRQRYNLTAKDV	_QRYN(de)LTAK_
139	Glycosylation	IPI00130754	Ephrin-B1	P52795;Q544L9	YITSTSNGSLEGL	_YHDYYITSTSN(de)GSLEGLENR_
108	Glycosylation	IPI00131021	Heparan sulfate 2-O-sulfotransferase 1;38 kDa protein	Q8R3H7	YHVLHINTTKNNP	_YHVLHIN(de)TTK_
1332		IPI00672438	similar to complement component 4, gene 1 isoform 3;Complement C4-B;similar to complement component 4, gene 1 isoform 5;sex-limited protein;similar to complement component 4, gene 1 isoform 4;similar to complement C4	P01029;B2RWX2;B2RXW7;Q3TAT4;Q3TYN1;Q9QWR4;B0G0Y3;B9EIU2;O88305;Q62237;Q62238;Q6P3Y0;Q9QUF7;Q9QUF8;Q9QUF9;Q9Z0D8;Q9Z0J3	TEEKALNVTLSSM	_ALN(de)VTLSSM(ox)GR_
268	Glycosylation	IPI00131143	Isoform 1 of Protein sel-1 homolog 1;Isoform 2 of Protein sel-1 homolog 1	Q9Z2G6-1;Q9Z2G6;Q3TT70;Q5DTL8;Q9Z2G6-2;Q6GTY4;Q6PFR3;Q80YC0	ASGLGVNSSQAKA	_GQTGLGFLYASGLGVN(de)SSQAK_
427	Glycosylation	IPI00131143	Isoform 1 of Protein sel-1 homolog 1;Isoform 2 of Protein sel-1 homolog 1	Q9Z2G6-1;Q9Z2G6;Q3TT70;Q5DTL8;Q9Z2G6-2;Q6GTY4;Q6PFR3;Q80YC0	DIVPQSNETALHY	_M(ox)YSEGSDIVPQSN(de)ETALHYFK_
510	Glycosylation	IPI00131168	Cholinesterase;butyrylcholinesterase precursor	Q03311;Q499C7;Q543J3	AKYGHPNGTQGNS	_YGHPN(de)GTQGN(de)STM(ox)WPVFTSTEQK_
515	Glycosylation	IPI00131168	Cholinesterase;butyrylcholinesterase precursor	Q03311;Q499C7;Q543J3	PNGTQGNSTMWPV	_YGHPN(de)GTQGN(de)STM(ox)WPVFTSTEQK_
80	Glycosylation	IPI00131216	Liver carboxylesterase 22	Q64176;Q3UN14	PWSSVKNATSYPP	_N(de)ATSYPPM(ox)CFQDPVTGQIVNDLLTNR_
39	Glycosylation	IPI00131830	Serine protease inhibitor A3K	P07759	FHEHQDNGTQDDS	_EM(ox)DIVFHEHQDN(de)GTQDDSLTLASVNTDFAFSLYK_
105	Glycosylation	IPI00131830	Serine protease inhibitor A3K	P07759	LEGLKFNLTETPE	_FN(de)LTETPEADIHQGFGN(de)LLQSLSQPEDQDQIN(de)IGNAM(ox)FIEK_
185	Glycosylation	IPI00131830	Serine protease inhibitor A3K	P07759	INDYVSNQTQGMI	_NLINDYVSN(de)QTQGM(ox)IKELISELDER_
270	Glycosylation	IPI00131830	Serine protease inhibitor A3K	P07759	ELKYTGNASALLI	_YTGN(de)ASALLILPDQGR_
279	Glycosylation	IPI00923060	ADAM metallopeptidase domain 10 precursor;Disintegrin and metalloproteinase domain-containing protein 10	B8JJJ0;O35598;B3SRB2;Q6NZC0	VKRIRINTTSDEK	_IN(de)TTSDEKDPTNPFRFPNIGVEK_
117	Glycosylation	IPI00132189	Tetraspanin-31	Q9CQ88	SWSVLSNSTRHEL	_NTQADVINASWSVLSN(de)STR_
696	Glycosylation	IPI00894972	133 kDa protein;Integrin alpha-L;integrin alpha L;Putative uncharacterized protein;84 kDa protein	P24063;B7ZN90;B7ZN91;Q3T9N8;Q3TB85;Q3U159;Q9WTV4;B7ZN92;Q9R200;Q3URE4	SHELSGNTSITPD	_GLFPDGSHELSGN(de)TSITPDK_
277		IPI00132454	Isoform 2 of Endoplasmic reticulum-Golgi intermediate compartment protein 3;Isoform 1 of Endoplasmic reticulum-Golgi intermediate compartment protein 3;ERGIC and golgi 3;ERGIC and golgi 3	Q9CQE7-2;Q9CQE7;Q9CQE7-1;A3KGK1;B7ZCP0;A3KGK2	NPLDHTNVTAPQA	_HLSFGEDYPGIVNPLDHTN(de)VTAPQASM(ox)M(ox)FQYFVK_
669	Glycosylation	IPI00132474	Integrin beta-1;Integrin beta1D	P09055;Q8BUD1;Q60993;Q61126	QECSHFNLTKVES	_KDTCAQECSHFN(de)LTK_
917		IPI00132600	Niemann-Pick C1 protein;Niemann Pick type C1	O35604;Q3U2B2;Q7TMD4;Q8BLK0	GGMGCDNDSLVQQ	_KGQNM(ox)VCGGM(ox)GCDN(de)DSLVQQIFNAAELDTYTR_
72	Glycosylation	IPI00133292	Claudin domain-containing protein 1;14 kDa protein;11 kDa protein	Q9CQX5	DVLFRYNGSLGLW	_YN(de)GSLGLWR_
44	Glycosylation	IPI00133500	Phosphatidylcholine-sterol acyltransferase;lecithin cholesterol acyltransferase precursor	P16301;Q791M3;Q8K139;Q9CW47	PKAELSNHTRPVI	_AELSN(de)HTRPVILVPGCLGNRLEAK_
108	Glycosylation	IPI00133500	Phosphatidylcholine-sterol acyltransferase;lecithin cholesterol acyltransferase precursor	P16301;Q791M3;Q8K139;Q9CW47	NTRIVYNHSSGRV	_IVYN(de)HSSGR_
89	Glycosylation	IPI00551169	Isoform 2 of Microfibril-associated glycoprotein 4;Isoform 1 of Microfibril-associated glycoprotein 4	Q9D1H9-2;Q9D1H9;Q9D1H9-1	VFQKRFNGSVSFF	_FN(de)GSVSFFR_
163		IPI00551169	Isoform 2 of Microfibril-associated glycoprotein 4;Isoform 1 of Microfibril-associated glycoprotein 4	Q9D1H9-2;Q9D1H9;Q9D1H9-1	DLEDFENNTAYAK	_VDLEDFEN(de)NTAYAK_
293	Glycosylation	IPI00134432	UDP-glucuronosyltransferase 1-6;MCG14318, isoform CRA_e;18 kDa protein	Q64435;Q6NSR5;Q6XL46;Q6XL47;Q8R0P3	EFEAYVNASGEHG	_LTQEFEAYVN(de)ASGEHGIVVFSLGSM(ox)VSEIPEKK_
115	Glycosylation	IPI00222967	Isoform LAMP-2B of Lysosome-associated membrane glycoprotein 2;Lysosomal membrane glycoprotein 2, isoform CRA_a;lysosomal membrane glycoprotein 2 isoform 1;Isoform LAMP-2A of Lysosome-associated membrane glycoprotein 2;Isoform LAMP-2C of Lysosome-associate	P17047-2;P17047;Q8C5K0;A2A430;Q3TWE1;Q3TXG5;Q3UIW3;P17047-1;P17047-3;Q8BSG8;Q8C876;Q9CZU7	DIVLSYNTSDSTV	_EASHYSIHDIVLSYN(de)TSDSTVFPGAVAK_
754	Glycosylation	IPI00134585	Glutamyl aminopeptidase	P16406;Q52JJ6;Q6P3C1;Q8CD51	DREALGNASQLFD	_M(ox)GDREALGN(de)ASQLFDSWLKGSASIPVNLR_
189	Glycosylation	IPI00134585	Glutamyl aminopeptidase	P16406;Q52JJ6;Q6P3C1;Q8CD51	EFKGWLNGSLVGF	_GWLN(de)GSLVGFYK_
637	Glycosylation	IPI00134585	Glutamyl aminopeptidase	P16406;Q52JJ6;Q6P3C1;Q8CD51	AEALSSNHTRFSA	_VNYEGGTWDWIAEALSSN(de)HTR_
792	Glycosylation	IPI00134585	Glutamyl aminopeptidase	P16406;Q52JJ6;Q6P3C1;Q8CD51	GNEAAWNYTLEQY	_YGM(ox)QNSGNEAAWN(de)YTLEQYQK_
89	Glycosylation	IPI00134691	UDP-glucuronosyltransferase 1-1;UDP glucuronosyltransferase 1 family, polypeptide A1	Q63886;Q561M6;Q6XL50;Q9R0A4	VPFQKENVTATLV	_KFPVPFQKEN(de)VTATLVELGR_
297	Glycosylation	IPI00134691	UDP-glucuronosyltransferase 1-1;UDP glucuronosyltransferase 1 family, polypeptide A1;UDP-glucuronosyltransferase 1-2;UDP glucuronosyltransferase 1 family, polypeptide A5	Q63886;Q561M6;Q6XL50;Q9R0A4;P70691;Q545X2;Q6XL49;B2RT14;Q6XL48;Q76K67	EFEAYVNASGEHG	_KPLSQEFEAYVN(de)ASGEHGIVVFSLGSM(ox)VSEIPEKK_
430	Glycosylation	IPI00877320	tissue-nonspecific alkaline phosphatase precursor;Alkaline phosphatase, tissue-nonspecific isozyme	B7XGA6;Q3TJD3;Q3TQ02;Q6P1B0;Q8JZS4;Q9EQ79;P09242	VDGERENVSMVDY	_VVDGEREN(de)VSM(ox)VDYAHNNYQAQSAVPLR_
275	Glycosylation	IPI00134808	C4b-binding protein;complement component 4 binding protein precursor;Complement component 4 binding protein	P08607;Q3UW06;Q80SX2;Q91X48;B2KGU5	VRLACLNGTVLRG	_LACLN(de)GTVLR_
227	Glycosylation	IPI00134808	C4b-binding protein;complement component 4 binding protein precursor;Complement component 4 binding protein;26 kDa protein;Complement component 4 binding protein	P08607;Q3UW06;Q80SX2;Q91X48;B2KGU5;B2KGU6	IGCTVVNKTVPVW	_LVGSPFIGCTVVN(de)K_
184	Glycosylation	IPI00135635	Serine protease inhibitor A3M	Q03734	INDYVSNQTQGMI	_NLINDYVSN(de)QTQGM(ox)IK_
269	Glycosylation	IPI00135635	Serine protease inhibitor A3M;Serine protease inhibitor A3N	Q03734;Q91WP6	ELKYTGNASALFI	_YTGN(de)ASALFILPDQGR_
627		IPI00136012	Vitamin K-dependent gamma-carboxylase	Q9QYC7;B2RS80;Q3TME3;Q8BSR0	LKEKVENGSETGP	_VEN(de)GSETGPLPPELQPLLEGEVK_
605		IPI00136012	Vitamin K-dependent gamma-carboxylase	Q9QYC7;B2RS80;Q3TME3;Q8BSR0	YMYVYVNTTEVAL	_VYTVSSSPSCYM(ox)YVYVN(de)TTEVALEQDLAYLQELK_
6	Glycosylation	IPI00136210	Elongation of very long chain fatty acids protein 3	O35949;Q3TS46	_MDTSMNFSRGLK	_(ac)M(ox)DTSM(ox)N(de)FSR_
225	Glycosylation	IPI00136642	Antithrombin-III	P32261;Q543J5	INNWVANKTEGRI	_VTINNWVAN(de)KTEGR_
70	Glycosylation	IPI00136925	Immunoglobulin J chain	P01592	PLNNRENISDPTS	_IVVPLNNREN(de)ISDPTSPLR_
63	Glycosylation	IPI00473190	Protein C receptor, endothelial, isoform CRA_b;Endothelial protein C receptor;protein C receptor, endothelial;Protein C receptor, endothelial, isoform CRA_a	Q8K357;Q64695;Q4FK76;A2AUV5;Q9JKV8	LEGPSQNVTILQL	_LLTHTLEGPSQN(de)VTILQLQPWQDPESWER_
345		IPI00658539	cathepsin A isoform a;Lysosomal protective protein	Q9D2D1;P16675;Q544R6	LDPPCTNTTAPSN	_LDPPCTN(de)TTAPSNYLNNPYVR_
158		IPI00658539	cathepsin A isoform a;Lysosomal protective protein;Cathepsin A;Cathepsin A	Q9D2D1;P16675;Q544R6;A2A5J6;A2A5J8	DKMYVTNDTEVAE	_M(ox)YVTN(de)DTEVAENNYEALKDFFR_
118	Glycosylation	IPI00137491	Tartrate-resistant acid phosphatase type 5	Q05117;Q38RM9	NHDHLGNVSAQIA	_NIPWYVLAGNHDHLGN(de)VSAQIAYSK_
47	Glycosylation	IPI00137831	Reticulocalbin-1	Q05186;A2A3Z8	ERPPEDNQSFQYD	_VVRPDSELGERPPEDN(de)QSFQYDHEAFLGK_
254	Glycosylation	IPI00137987	Zinc-alpha-2-glycoprotein;alpha-2-glycoprotein 1, zinc precursor	Q64726;Q9DBB7	GVFPNGNGTYLSW	_GVFPN(de)GN(de)GTYLSWAEVEVSPQDIDPFFCLIDHR_
546	Glycosylation	IPI00138209	Isoform 2A of Desmocollin-2;Isoform 2B of Desmocollin-2	P55292-1;P55292;Q6PEU5;Q8C5C8;Q99KH1;P55292-2;Q544V1	VRNGIYNITVLAL	_N(de)GIYN(de)ITVLALDADGR_
377	Glycosylation	IPI00138342	Liver carboxylesterase N	P23953	RFHSELNISESMI	_RFHSELN(de)ISESM(ox)IPAVIEK_
274	Glycosylation	IPI00138342	Liver carboxylesterase N;19 kDa protein	P23953	ATLSQCNDTSSAA	_NIQAVNEIIATLSQCN(de)DTSSAAM(ox)VQCLR_
513	Glycosylation	IPI00139788	Serotransferrin	Q921I1	APGYEKNSTLCDL	_N(de)STLCDLCIGPLK_
96		IPI00153143	UDP glucuronosyltransferase 2 family, polypeptide B1	Q8R084	FEKWVGNWTYELK	_WVGN(de)WTYELK_
139	Glycosylation	IPI00153187	Sulfatase-modifying factor 1	Q8R0F3	DFEKFVNSTGYLT	_FVN(de)STGYLTEAEK_
70	Glycosylation	IPI00153316	UDP-glucuronosyltransferase 3A1	Q3UP75	PDFRKENSSYQVI	_KEN(de)SSYQVINWR_
117	Glycosylation	IPI00153468	Transmembrane emp24 domain-containing protein 4;Transmembrane emp24 protein transport domain containing 4	Q8R1V4;Q5SVW9	QICLHSNSTRMAL	_FTFTSHTPGDHQICLHSN(de)STR_
471	Glycosylation	IPI00153632	Protein O-mannosyl-transferase 1	Q8R2R1;A2AN36	VRFVHVNTSAILK	_FVHVN(de)TSAILK_
167	Glycosylation	IPI00154056	Lysosomal acid phosphatase;Putative uncharacterized protein	P24638;A2AGR5;Q3U4F3;B7ZCF4;Q3UZN1	RYEQLQNETRQTP	_YEQLQN(de)ETR_
92	Glycosylation	IPI00154056	Lysosomal acid phosphatase;Putative uncharacterized protein;Acid phosphatase 2 lysosomal	P24638;A2AGR5;Q3U4F3;B7ZCF4;Q3UZN1;B7ZCF5	RYHGFLNTSYHRQ	_YHGFLN(de)TSYHR_
144		IPI00719927	Protocadherin 1 isoform 2;Protocadherin 1	Q2TJI9;Q2TJH4;Q2TJI8;Q8CFX3;Q8QZT6;Q9CVI3	VIQVKANDSDQGA	_AN(de)DSDQGANAEIDYTFHQAPEVVR_
457		IPI00719927	Protocadherin 1 isoform 2;Protocadherin 1	Q2TJI9;Q2TJH4;Q2TJI8;Q8CFX3;Q8QZT6;Q9CVI3	FMLSGYNFSVMEN	_FM(ox)LSGYN(de)FSVM(ox)ENM(ox)PALSPVGM(ox)VTVIDGDKGENAR_
501		IPI00719927	Protocadherin 1 isoform 2;Protocadherin 1	Q2TJI9;Q2TJH4;Q2TJI8;Q8CFX3;Q8QZT6;Q9CVI3	GDFVIQNGTGTIL	_VQLSVEQDN(de)GDFVIQN(de)GTGTILSSLSFDR_
652		IPI00719927	Protocadherin 1 isoform 2;Protocadherin 1	Q2TJI9;Q2TJH4;Q2TJI8;Q8CFX3;Q8QZT6;Q9CVI3	LVHLYVNETLANR	_YGTALVHLYVN(de)ETLAN(de)R_
657		IPI00719927	Protocadherin 1 isoform 2;Protocadherin 1	Q2TJI9;Q2TJH4;Q2TJI8;Q8CFX3;Q8QZT6;Q9CVI3	VNETLANRTLLET	_YGTALVHLYVN(de)ETLAN(de)R_
93	Glycosylation	IPI00165730	Isoform 1 of Putative phospholipase B-like 2;Isoform 2 of Putative phospholipase B-like 2	Q3TCN2-1;Q3TCN2;Q3TCN2-2	DAVAWANLTNAIR	_LEDGFHPDAVAWAN(de)LTNAIR_
80	Glycosylation	IPI00165807	Isoform 1 of N-acetylmuramoyl-L-alanine amidase;Isoform 2 of N-acetylmuramoyl-L-alanine amidase;Isoform 3 of N-acetylmuramoyl-L-alanine amidase;TAGL-delta;TagL-gamma	Q8VCS0-1;Q8VCS0;A2TJ61;Q54A77;Q8VCS0-2;Q76L85;Q8VCS0-3;Q71S36;Q71S45;Q71S44	LKAPSHNTTEPDP	_APSHN(de)TTEPDPHSLSPELQALISEVAQHDVQN(de)GR_
465	Glycosylation	IPI00165807	Isoform 1 of N-acetylmuramoyl-L-alanine amidase;Isoform 2 of N-acetylmuramoyl-L-alanine amidase	Q8VCS0-1;Q8VCS0;A2TJ61;Q54A77;Q8VCS0-2;Q76L85	GVAFVGNYTGSLP	_GFGVAFVGN(de)YTGSLPNEAALNTVR_
174		IPI00169617	Glycolipid transfer protein domain-containing protein 2	Q8K0R6;Q8K1B3	ARVHGPNASHYTS	_VHGPN(de)ASHYTSLM(ox)TM(ox)ITWER_
146		IPI00169782	ST6 beta-galactosamide alpha-2,6-sialyltranferase 1	Q8BM62;Q8K1L1;Q9JJM6	HLRDHVNVSMIEA	_DHVN(de)VSM(ox)IEATDFPFN(de)TTEWEGYLPK_
158		IPI00169782	ST6 beta-galactosamide alpha-2,6-sialyltranferase 1	Q8BM62;Q8K1L1;Q9JJM6	ATDFPFNTTEWEG	_DHVN(de)VSM(ox)IEATDFPFN(de)TTEWEGYLPK_
465		IPI00170355	Dentin matrix protein 4;28 kDa protein	Q5MJS3	TFEKFGNETFIIH	_FGN(de)ETFIIHLDN(de)GR_
184	Glycosylation	IPI00173181	Isoform 1 of Transmembrane protease, serine 6;Isoform 2 of Transmembrane protease, serine 6;Isoform 3 of Transmembrane protease, serine 6	Q9DBI0-1;Q9DBI0;Q9DBI0-2;Q9DBI0-3	VDELLSNSSTLAS	_ELLVDELLSN(de)SSTLASYK_
140	Glycosylation	IPI00187353	ERO1-like protein beta	Q8R2E9;Q14DR9	NKLGAINSTLSNE	_LGAIN(de)STLSNESK_
247		IPI00221418	Isoform 1 of Phospholipase D4;Isoform 2 of Phospholipase D4	Q8BG07-1;Q8BG07;Q8BG07-2	LGAIIYNCSNLAQ	_ELGAIIYN(de)CSNLAQDLEK_
415		IPI00221418	Isoform 1 of Phospholipase D4;Isoform 2 of Phospholipase D4	Q8BG07-1;Q8BG07;Q8BG07-2	FIVPVGNHSNIPF	_VFIVPVGN(de)HSNIPFSR_
175	Glycosylation	IPI00221426	N-acetylglucosamine-6-sulfatase	Q8BFR4;Q3UBB0;Q3UDX9;Q6PCZ1	KNSKYYNYTLSIN	_YYN(de)YTLSIN(de)GK_
598	Glycosylation	IPI00221669	Isoform 1 of Protein O-mannosyl-transferase 2;Isoform 3 of Protein O-mannosyl-transferase 2;Isoform 2 of Protein O-mannosyl-transferase 2	Q8BGQ4-1;Q8BGQ4;Q6P5C1;Q8BGQ4-3;Q8BGQ4-2	INPKLPNISLDVL	_LPN(de)ISLDVLQPSFPEILLESHM(ox)VM(ox)IR_
159	Glycosylation	IPI00221998	Adipocyte plasma membrane-associated protein	Q9D7N9	GIRAGPNGTLFVV	_AGPN(de)GTLFVVDAYK_
610		IPI00222429	nodal modulator 1	Q3TKZ1;Q6GQT9;Q8BJM1;Q8BJM8;Q8BLS9;Q8K074;Q8R1I7	ENVGIYNLSRGVN	_CALSHAITLEFHQDGN(de)GPENVGIYN(de)LSR_
210		IPI00222429	nodal modulator 1	Q3TKZ1;Q6GQT9;Q8BJM1;Q8BJM8;Q8BLS9;Q8K074;Q8R1I7	LIVAGYNVSGSVR	_VTN(de)SNANAAGPLIVAGYN(de)VSGSVR_
246	Glycosylation	IPI00223352	C-type lectin domain family 4 member G	Q8BNX1	VDGASLNFSHWNS	_WVDGASLN(de)FSHWNSGEPNDSR_
308	Glycosylation	IPI00223446	Laminin subunit alpha-4	P97927;Q3ULY0;Q6PHW3;Q8BSJ0;Q91VV0;Q91YG8	RHVTDMNSTIHLL	_HVTDM(ox)N(de)STIHLLR_
574	Glycosylation	IPI00223446	Laminin subunit alpha-4	P97927;Q3ULY0;Q6PHW3;Q8BSJ0;Q91VV0;Q91YG8	KLSNLSNLSHDLV	_LSNLSN(de)LSHDLVQEATDHAYNLQQEADELSR_
77		IPI00331597	Histone H1.3;Histone H1.4;Histone H1.2;histone cluster 1, H1t	P43277;Q149Z9;Q3U292;P43274;P15864;Q3UXH2;Q5SZA3;Q07133	GYDVEKNNSRIKL	_ALAAAGYDVEKN(de)NSR_
215	Glycosylation	IPI00223987	Leucyl-cystinyl aminopeptidase	Q8C129;Q3TTA8;Q6NY09;Q8BZ14	LHSTGHNISRVTF	_DIILHSTGHN(de)ISR_
256	Glycosylation	IPI00223987	Leucyl-cystinyl aminopeptidase	Q8C129;Q3TTA8;Q6NY09;Q8BZ14	PLLTGHNYTLKIE	_QVEILEYPYHEQIAVVAPEPLLTGHN(de)YTLK_
72	Glycosylation	IPI00224073	Probable carboxypeptidase PM20D1	Q8C165	FSHEESNTTALAE	_GAIQIPTVSFSHEESN(de)TTALAEFGEYIR_
253		IPI00224073	Probable carboxypeptidase PM20D1	Q8C165	DLMLQVNMTPGHS	_GALDLM(ox)LQVN(de)M(ox)TPGHSSAPPK_
546		IPI00224237	Isoform 1 of Transmembrane and TPR repeat-containing protein 3;Isoform 2 of Transmembrane and TPR repeat-containing protein 3	Q8BRH0-1;Q8BRH0;Q8BRH0-2	ANLIRANESRLEE	_AN(de)ESRLEEADQLYR_
52	Glycosylation	IPI00463764	UDP-glucuronosyltransferase 3A2;Putative uncharacterized protein	Q8JZZ0;Q8BRY7	LHEGGHNVTKLLY	_VSQVLHEGGHN(de)VTK_
427	Glycosylation	IPI00828535	attractin precursor;Attractin	A2AP43;B9EIU3;Q3TRR6;Q8CHF0;Q9WU60	RVFHIHNESWVLL	_VFHIHN(de)ESWVLLTPK_
307		IPI00225715	glycosylphosphatidylinositol specific phospholipase D1	O70362;Q7TNZ4;Q8R432;Q8VCU2;Q9DBH3	KNDFHRNLTMFIS	_N(de)LTM(ox)FISR_
660		IPI00225715	glycosylphosphatidylinositol specific phospholipase D1	O70362;Q7TNZ4;Q8R432;Q8VCU2;Q9DBH3	SGYVRVNGTLTQV	_VN(de)GTLTQVLLVGAPTHDDVSK_
102		IPI00553528	hypothetical protein LOC434674;Putative uncharacterized protein;cDNA fis, clone TRACH2000665, moderately similar to Rattus norvegicus putative integral membrane transport protein;56 kDa protein;C730048C13Rik protein;Putative uncharacterized protein	B2RT89;Q8BWE8;Q96LX3;Q810T7;Q3V3G0	WHLLHLNGTFSNE	_RFAQPQWHLLHLN(de)GTFSN(de)ETEPDTEPCVDGWVYDR_
107		IPI00553528	hypothetical protein LOC434674;Putative uncharacterized protein;cDNA fis, clone TRACH2000665, moderately similar to Rattus norvegicus putative integral membrane transport protein;56 kDa protein;C730048C13Rik protein;Putative uncharacterized protein	B2RT89;Q8BWE8;Q96LX3;Q810T7;Q3V3G0	LNGTFSNETEPDT	_RFAQPQWHLLHLN(de)GTFSN(de)ETEPDTEPCVDGWVYDR_
351	Glycosylation	IPI00226563	Isoform 1 of Protein tweety homolog 3;Isoform 2 of Protein tweety homolog 3	Q6P5F7-1;Q6P5F7;Q6P5F7-2	RVQEVLNGTEVNL	_VQEVLN(de)GTEVNLQHLTALVDCR_
331	Glycosylation	IPI00226790	GPI transamidase component PIG-T;65 kDa protein;similar to GPI transamidase component PIG-T precursor (Phosphatidylinositol-glycan biosynthesis class T protein) (Neuronal development-associated protein 7) isoform 2;Phosphatidylinositol glycan anchor biosyn	Q8BXQ2;Q3U047;Q3U5R2;B7ZC19	FDTAMINNSRNLN	_KTYAVYDLFDTAM(ox)IN(de)NSR_
917	Glycosylation	IPI00226932	Isoform 1 of Uncharacterized protein KIAA0090;Isoform 2 of Uncharacterized protein KIAA0090;Isoform 3 of Uncharacterized protein KIAA0090	Q8C7X2-1;Q8C7X2;A1L2Z3;Q8C7X2-2;A2AMV0;Q8C7X2-3	ERFINYNQTVSRM	_FIN(de)YN(de)Q(de)TVSR_
122		IPI00227834	inter-alpha trypsin inhibitor, heavy chain 2	Q61703;Q3UEG7;Q8K016	KGAFISNFTMTVN	_GAFISN(de)FTM(ox)TVN(de)GM(ox)TFTSSIK_
70	Glycosylation	IPI00229820	Protein FAM20A	Q8CID3;A2AGP7	LGTASHNFSGALP	_DLGTASHN(de)FSGALPR_
180	Glycosylation	IPI00462465	Isoform 2 of Membralin;Isoform 1 of Membralin	Q8CIV2-2;Q8CIV2;Q8CIV2-1;Q498A7	SGADALNDSQDFP	_VFKPQSGADALN(de)DSQDFPFPETPAK_
824		IPI00626793	Isoform 2A of Voltage-dependent calcium channel subunit alpha-2/delta-1;Isoform 2E of Voltage-dependent calcium channel subunit alpha-2/delta-1;Isoform 2D of Voltage-dependent calcium channel subunit alpha-2/delta-1;Isoform 2B of Voltage-dependent calcium	O08532-1;O08532;O08532-5;O08532-4;Q14BH8;O08532-2;O08532-3;Q8C6Y3	VNSWIENFTKTSI	_IDVNSWIEN(de)FTK_
270	Glycosylation	IPI00230412	Vascular non-inflammatory molecule 3	Q9QZ25;Q2T9H5	LAANTHNTSMHMT	_AM(ox)GVNVLAAN(de)THNTSM(ox)HM(ox)TGSGIYSPEAVR_
191		IPI00830356	41 kDa protein;VIP36-like protein;Lman2l protein	P59481;Q05CD1	ISAMVNNGSLSYD	_VFPYISAM(ox)VNN(de)GSLSYDHER_
1253		IPI00268475	sialoadhesin;Isoform 3 of Sialoadhesin	Q62230-1;Q62230;Q6KAT6;Q62230-3	SPLGKANTSLELL	_AN(de)TSLELLLEGVR_
276		IPI00230718	complement component 9	P06683	HSSKPTNISAKFK	_GAGEVSPAEHSSKPTN(de)ISAK_
624	Glycosylation	IPI00265291	Isoform 1 of Ectonucleotide pyrophosphatase/phosphodiesterase family member 1	P06802-2;P06802;Q3V3C8	DFEKQLNLTTEDD	_QLN(de)LTTEDDDIYHM(ox)TVPYGRPR_
113	Glycosylation	IPI00272381	Putative uncharacterized protein;Isoform 2 of Prolyl 4-hydroxylase subunit alpha-1;Putative uncharacterized protein	Q60715-1;Q60715;Q3TN84;Q3UF16;Q60715-2;Q3TTT2	SDGFISNLTIQRQ	_DM(ox)SDGFISN(de)LTIQR_
384	Glycosylation	IPI00279079	Fibrinogen beta chain	Q8K0E8;Q3TGR2	SQLVGENRTMTIH	_YKGTAGN(de)ALM(ox)DGASQLVGEN(de)R_
284		IPI00307837	Elongation factor 1-alpha 1	P10126;Q3TII3;Q3UA81;Q3UZQ3;Q4FZE5;Q58E64	VTFAPVNVTTEVK	_VETGVLKPGM(ox)VVTFAPVN(de)VTTEVK_
313		IPI00475246	Igh protein;Ig gamma-1 chain C region, membrane-bound form;Ig gamma-1 chain C region secreted form	Q99LC4;P01869;P01868	PREEQFNSTFRSV	_EEQFN(de)STFR_
185	Glycosylation	IPI00308609	Lectin, mannose-binding 2;Vesicular integral-membrane protein VIP36	Q8BJL4;Q9DBH5	ISVMVNNGSLSYD	_VFPYISVM(ox)VN(de)NGSLSYDHSK_
575	Glycosylation	IPI00308971	Cation-independent mannose-6-phosphate receptor	Q07113;B7ZWC4;B9EKB8;Q7TMR1;Q80VF2;Q8C2F9;Q8C6V9;Q8K0J1	DKKISTNITLVCK	_ISTN(de)ITLVCKPGDLESAPVLR_
300	Glycosylation	IPI00309035	Dolichyl-diphosphooligosaccharide--protein glycosyltransferase subunit 1	Q91YQ5;Q3U900;Q5RKP4;Q8BMR3;Q99LY0	YRDEIGNVSTSHL	_DEIGN(de)VSTSHLLILDDSVEM(ox)EIRPR_
52	Glycosylation	IPI00309214	Serum amyloid P-component	P12246;Q4JFI8	LEKPLQNFTLCFR	_LIPHLEKPLQN(de)FTLCFR_
627	Glycosylation	IPI00309230	Beta-glucuronidase;Putative uncharacterized protein	P12265;Q3TW82;Q6IR10	RYWRIANETGGHG	_IAN(de)ETGGHGSGPR_
172	Glycosylation	IPI00309230	Beta-glucuronidase;Putative uncharacterized protein;Gusb protein;Putative uncharacterized protein	P12265;Q3TW82;Q6IR10;Q8VEM0;Q99KJ6;Q8BPE3	RITIAINNTLTPH	_ITIAIN(de)NTLTPHTLPPGTIVYK_
416	Glycosylation	IPI00309230	Beta-glucuronidase;Putative uncharacterized protein	P12265;Q3TW82;Q6IR10	LPQSFGNESLRHH	_YGIVVIDECPGVGIVLPQSFGN(de)ESLR_
72	Glycosylation	IPI00310049	Carboxypeptidase B2	Q9JHH6	EVHFFVNASDVDS	_KEVHFFVN(de)ASDVDSVK_
90	Glycosylation	IPI00310059	Polymeric immunoglobulin receptor;23 kDa protein;22 kDa protein	O70570;Q8R544	LINFPENNTFVIN	_ANLINFPEN(de)NTFVINIEQLTQDDTGSYK_
147	Glycosylation	IPI00310059	Polymeric immunoglobulin receptor;23 kDa protein;22 kDa protein	O70570;Q8R544	TKDIGRNVTIECP	_N(de)VTIECPFKR_
201	Glycosylation	IPI00310090	N-acetylgalactosamine-6-sulfatase;Putative uncharacterized protein	Q571E4;Q8CC47	RKTGEANLTQLYT	_KTGEAN(de)LTQLYTQEALDFIQTQHAR_
275	Glycosylation	IPI00311808	Transmembrane glycoprotein NMB;glycoprotein (transmembrane) nmb precursor	Q99P91;Q3TAV1;Q3TBB0;Q3TWC7;Q3TXG7;Q3U3R9;Q3UE75;Q8BVA0	DPSHFLNDSAISY	_DLPIVFDVLIHDPSHFLN(de)DSAISYK_
88	Glycosylation	IPI00313900	Lumican;>Q05443 SWISS-PROT:Q05443 (Bos taurus) Lumican precursor	P51885;Q05443	DEKAFENVTDLQW	_AFEN(de)VTDLQWLILDHN(de)LLENSK_
127	Glycosylation	IPI00313900	Lumican;>Q05443 SWISS-PROT:Q05443 (Bos taurus) Lumican precursor	P51885;Q05443	LHINYNNLTESVG	_LHINYN(de)NLTESVGPLPK_
160	Glycosylation	IPI00313900	Lumican	P51885	SFDGLVNLTFIYL	_LGSFDGLVN(de)LTFIYLQHNQLKEDAVSASLK_
74	Glycosylation	IPI00315535	Hyaluronidase-2	O35632;Q3UZE4;Q542F2;Q8C309	EGFFNQNITTFYY	_ATPNEGFFN(de)QNITTFYYDR_
103	Glycosylation	IPI00315535	Hyaluronidase-2	O35632;Q3UZE4;Q542F2;Q8C309	HGGVPQNGSLCAH	_FDAAGTSVHGGVPQN(de)GSLCAHLPM(ox)LK_
346	Glycosylation	IPI00315576	Sialidase-1	O35657;Q3UL64;Q7TSW3	LRWSFSNGTSWQK	_WSFSN(de)GTSWQK_
356		IPI00316430	tyrosylprotein sulfotransferase 2;Protein-tyrosine sulfotransferase 2	Q3TQN1;O88856;Q3UDH0	PDPIVINNTHRVL	_LGYDPYANPPNYGNPDPIVIN(de)NTHR_
613		IPI00316469	Dolichyl-diphosphooligosaccharide--protein glycosyltransferase subunit STT3B	Q3TDQ1;Q8BGU3	QIAGMANRTTLVD	_VM(ox)SWWDYGYQIAGM(ox)AN(de)R_
253	Glycosylation	IPI00317356	Serum paraoxonase/arylesterase 1	P52430;Q91X30	VYEKHANWTLTPL	_HAN(de)WTLTPLK_
324	Glycosylation	IPI00317356	Serum paraoxonase/arylesterase 1	P52430;Q91X30	TVVYAENGTVLQG	_ITVVYAEN(de)GTVLQGTTVASVYK_
157	Glycosylation	IPI00317488	Heparan-alpha-glucosaminide N-acetyltransferase	Q3UDW8	KFGEFGNYSLLVQ	_FGEFGN(de)YSLLVQHASSGANK_
137	Glycosylation	IPI00317488	Heparan-alpha-glucosaminide N-acetyltransferase	Q3UDW8	GSILQVNSTSEER	_PAKPSVAPVSVSTQHGSILQVN(de)STSEER_
403	Glycosylation	IPI00318595	Endoplasmic reticulum aminopeptidase 1;Type 1 tumor necrosis factor receptor shedding aminopeptidase regulator	Q9EQH2;Q6GTP5;Q8C4S7;Q8C9W5;Q8CA64	MEVDALNSSHPVS	_CFN(de)AM(ox)EVDALNSSHPVSTPVENPAQIR_
234	Glycosylation	IPI00319509	Aminopeptidase N	P97449;Q3TB69;Q3UP74	AMKAMFNITLIYP	_AM(ox)FN(de)ITLIYPN(de)NLIALSNM(ox)LPK_
114	Glycosylation	IPI00319509	Aminopeptidase N	P97449;Q3TB69;Q3UP74	TVRFTCNQTTDVI	_FTCN(de)QTTDVIIIHSK_
38	Glycosylation	IPI00320065	T-cell surface glycoprotein CD1d1;34 kDa protein;Cd1d1 protein	P11609;Q7TMK5	QMSSFANRSWSRT	_CLQM(ox)SSFAN(de)R_
60	Glycosylation	IPI00320065	T-cell surface glycoprotein CD1d1;T-cell surface glycoprotein CD1d2	P11609;P11610;Q6PG97;Q80XA2	QTHRWSNDSATIS	_WSN(de)DSATISFTKPWSQGK_
261	Glycosylation	IPI00320241	DnaJ homolog subfamily B member 11	Q99KV1	GDDLYTNVTVSLV	_RGDDLYTN(de)VTVSLVEALVGFEM(ox)DITHLDGHK_
80	Glycosylation	IPI00321190	Sulfated glycoprotein 1;prosaposin isoform C preproprotein;prosaposin isoform A preproprotein;prosaposin isoform D preproprotein;prosaposin isoform F preproprotein;prosaposin isoform E preproprotein	Q61207;Q3UFE8;B2RUD7;Q3TID4;Q3TIT5;Q3TKB2;Q3TKK3;Q3TWE9;Q3TWF9;Q3TWL8;Q3TXP9;Q3U5W2;Q3U825;Q3U897;Q3U8C4;Q8BFQ1;Q3TXJ0;Q3TWM9;Q3UE29;Q3UAS4	GNLLKDNATQEEI	_DN(de)ATQEEILHYLEK_
459	Glycosylation	IPI00321190	Sulfated glycoprotein 1;prosaposin isoform C preproprotein;prosaposin isoform A preproprotein;prosaposin isoform D preproprotein;prosaposin isoform F preproprotein;prosaposin isoform E preproprotein	Q61207;Q3UFE8;B2RUD7;Q3TID4;Q3TIT5;Q3TKB2;Q3TKK3;Q3TWE9;Q3TWF9;Q3TWL8;Q3TXP9;Q3U5W2;Q3U825;Q3U897;Q3U8C4;Q8BFQ1;Q3TXJ0;Q3TWM9;Q3UE29;Q3UAS4	EHNLEKNSTKEEI	_N(de)STKEEILAALEK_
335		IPI00321375	biotinidase	Q8CIF4	GLTGTGNTTSEMD	_GHLIIAQVATNPQGLTGTGN(de)TTSEM(ox)DPSHRK_
105		IPI00321375	biotinidase	Q8CIF4	DGIHGFNFTRTSI	_GVQIIVFPEDGIHGFN(de)FTR_
189		IPI00321375	biotinidase	Q8CIF4	NVVFSDNGTLVDR	_YQFNTNVVFSDN(de)GTLVDR_
307	Glycosylation	IPI00323857	Endoglin;endoglin isoform 1;endoglin isoform 3;endoglin isoform 2	Q63961;Q8K100;Q3UAM9;A9Z1A0;Q5IRN0	AEARKLNASIVTS	_KLN(de)ASIVTSFVELPLVSN(de)VSLR_
322	Glycosylation	IPI00323857	Endoglin;endoglin isoform 1;endoglin isoform 3;endoglin isoform 2	Q63961;Q8K100;Q3UAM9;A9Z1A0;Q5IRN0	ELPLVSNVSLRAS	_KLN(de)ASIVTSFVELPLVSN(de)VSLR_
135	Glycosylation	IPI00323857	Endoglin;endoglin isoform 1;endoglin isoform 3;endoglin isoform 2	Q63961;Q8K100;Q3UAM9;A9Z1A0;Q5IRN0	QGQPRVNITVLPS	_VN(de)ITVLPSLTSR_
74	Glycosylation	IPI00321744	Endoplasmic reticulum-Golgi intermediate compartment protein 1	Q9DC16;Q4FK22;Q69ZP5	KIDVSLNISLPNL	_IDVSLN(de)ISLPNLHCELVGLDIQDEM(ox)GR_
307	Glycosylation	IPI00322447	Isoform 1 of Cell adhesion molecule 1;Isoform 2 of Cell adhesion molecule 1;Isoform 3 of Cell adhesion molecule 1;Isoform 4 of Cell adhesion molecule 1;46 kDa protein;Isoform 5 of Cell adhesion molecule 1;Isoform 6 of Cell adhesion molecule 1;Isoform 7 of	Q8R5M8-1;Q8R5M8;Q8R5M8-2;B5L830;Q9QYL4;Q8R5M8-3;Q1WIL9;Q8R5M8-4;Q9QYL3;Q8R5M8-5;Q8R5M8-6;Q8R5M8-7;B5L832;B5L833;B5L834	LFINNLNKTDNGT	_VDDEM(ox)PQHAVLSGPNLFINNLN(de)K_
116	Glycosylation	IPI00322447	Isoform 1 of Cell adhesion molecule 1;Isoform 2 of Cell adhesion molecule 1;Isoform 3 of Cell adhesion molecule 1;Isoform 4 of Cell adhesion molecule 1;46 kDa protein;Isoform 5 of Cell adhesion molecule 1	Q8R5M8-1;Q8R5M8;Q8R5M8-2;B5L830;Q9QYL4;Q8R5M8-3;Q1WIL9;Q8R5M8-4;Q9QYL3;Q8R5M8-5	LKVSLTNVSISDE	_VSLTN(de)VSISDEGR_
183	Glycosylation	IPI00322463	Beta-2-glycoprotein 1;Putative uncharacterized protein	Q01339;Q6LAL7;Q9CY42	HFAMIGNDTVMCT	_CLPHFAM(ox)IGN(de)DTVM(ox)CTEQGN(de)WTR_
193	Glycosylation	IPI00322463	Beta-2-glycoprotein 1;Putative uncharacterized protein	Q01339;Q6LAL7;Q9CY42	MCTEQGNWTRLPE	_CLPHFAM(ox)IGN(de)DTVM(ox)CTEQGN(de)WTR_
162	Glycosylation	IPI00322463	Beta-2-glycoprotein 1;Putative uncharacterized protein	Q01339;Q6LAL7;Q9CY42	YRPSAGNNSLYQD	_FALLKDYRPSAGN(de)NSLYQDTVVFK_
105	Glycosylation	IPI00322463	Beta-2-glycoprotein 1;Putative uncharacterized protein;17 kDa protein	Q01339;Q6LAL7;Q9CY42	SFEYPKNISFACN	_YTSFEYPKN(de)ISFACNPGFFLN(de)GTSSSK_
117	Glycosylation	IPI00322463	Beta-2-glycoprotein 1;Putative uncharacterized protein;17 kDa protein	Q01339;Q6LAL7;Q9CY42	NPGFFLNGTSSSK	_YTSFEYPKN(de)ISFACNPGFFLN(de)GTSSSK_
153		IPI00322497	Fcgrt protein	Q61559;Q6PKB0	FNPRIGNWTGEWP	_IGN(de)WTGEWPETEIVANLWM(ox)K_
71		IPI00875275	ATP-binding cassette, sub-family A (ABC1), member 8a;ATP-binding cassette sub-family A member 8-A	A2AB96;A4PBQ7;A4PBQ8;Q8K442	GRIDSFNDSTFMI	_IDSFN(de)DSTFM(ox)IVYTPITPTTQR_
112		IPI00875275	ATP-binding cassette, sub-family A (ABC1), member 8a;ATP-binding cassette sub-family A member 8-A;ATP-binding cassette, sub-family A (ABC1), member 8a	A2AB96;A4PBQ7;A4PBQ8;Q8K442;A2A6R7	ASPNEENMTELIS	_KILASPN(de)EEN(de)M(ox)TELISM(ox)R_
967	Glycosylation	IPI00875275	ATP-binding cassette, sub-family A (ABC1), member 8a;ATP-binding cassette sub-family A member 8-A;Putative uncharacterized protein (Fragment)	A2AB96;A4PBQ7;A4PBQ8;Q8K442;Q3UF86	GDEKNYNFTLACN	_NYN(de)FTLACNTK_
917		IPI00875275	ATP-binding cassette, sub-family A (ABC1), member 8a;ATP-binding cassette sub-family A member 8-A	A2AB96;A4PBQ7;A4PBQ8;Q8K442	TNLLIVNKTGAKI	_QSDYCWELAPHM(ox)YFLTPGQQPQPPLTN(de)LLIVNK_
402	Glycosylation	IPI00323134	Cadherin-2;cadherin 2 precursor;94 kDa protein	P15116;Q3UIC2;Q8BSI9;Q6GU11	VDVIVANLTVTDK	_VDVIVAN(de)LTVTDKDQPHTPAWNAAYR_
255	Glycosylation	IPI00330594	C-type lectin domain family 4 member F	P70194	LQHSMDNISAQIQ	_GSLQSANDLSSQTQGFLQHSM(ox)DN(de)ISAQIQTVR_
132	Glycosylation	IPI00330594	C-type lectin domain family 4 member F	P70194	LKYQMDNVSSLVQ	_YQM(ox)DN(de)VSSLVQLLGSHLEDVNADILQTK_
184		IPI00330680	Transmembrane protein 106B;Tmem106b protein (Fragment)	Q80X71;Q8R5E7	GKARLNNITNIGP	_LN(de)N(de)ITNIGPLDM(ox)K_
79	Glycosylation	IPI00331214	Platelet glycoprotein 4	Q08857;Q3TA14;Q3U6Y9;Q3UAI3;Q3UC79;Q8C6Z4;Q9CT95	PDDVAKNSSKIKV	_QFWIFDVQNPDDVAKN(de)SSK_
417	Glycosylation	IPI00331214	Platelet glycoprotein 4	Q08857;Q3TA14;Q3U6Y9;Q3UAI3;Q3UC79;Q8C6Z4;Q9CT95	VPILWLNETGTIG	_RPYIVPILWLN(de)ETGTIGDEKAEM(ox)FK_
233		IPI00331318	Palmitoyl-protein thioesterase;Putative uncharacterized protein	O88531;Q3TAR8;Q3U6J9;Q3U6W3;Q3UB92;Q8VBX5;Q3TEL0	VMVKFFNDSIVDP	_FFN(de)DSIVDPVDSEWFGFYR_
198		IPI00331318	Palmitoyl-protein thioesterase;Putative uncharacterized protein	O88531;Q3TAR8;Q3U6J9;Q3U6W3;Q3UB92;Q8VBX5;Q3TEL0	KESVYRNYSIFLA	_N(de)YSIFLADINQER_
325	Glycosylation	IPI00331550	Dipeptidyl-peptidase 2;Dipeptidylpeptidase 7, isoform CRA_d	Q9ET22;Q8R082	LAGLVYNSSGTEP	_ALAGLVYN(de)SSGTEPCYDIYR_
211	Glycosylation	IPI00339885	Collagen alpha-1(VI) chain	Q04857;B0LAD9;Q8C6Y0;Q99LW4	DHTYRRNFTAADW	_N(de)FTAADWGHSR_
1135	Glycosylation	IPI00342158	Nuclear pore membrane glycoprotein 210;Putative uncharacterized protein	Q9QY81;Q8C5C6	RGLMVGNGSVLGV	_GLM(ox)VGN(de)GSVLGVVQAVDAETGK_
405	Glycosylation	IPI00342158	Nuclear pore membrane glycoprotein 210;Putative uncharacterized protein	Q9QY81;Q8C5C6	VLSSSQNGSYHHI	_IEAVLPAEFFEVLSSSQN(de)GSYHHIR_
604	Glycosylation	IPI00345112	Isoform 1 of Integrin alpha-8	A2ARA8-1;A2ARA8	PINISLNYSLDDS	_LSPINISLN(de)YSLDDSTFK_
9		IPI00348586	Isoform 1 of Transmembrane protein 195;Isoform 3 of Transmembrane protein 195;Isoform 2 of Transmembrane protein 195	Q8BS35-1;Q8BS35;Q8BS35-3;Q8BS35-2	SPGAQDNVSVSQG	_RSPGAQDN(de)VSVSQGM(ox)R_
149		IPI00378224	Thioredoxin domain-containing protein 15	Q6P6J9	VATEDANSTDSLK	_ENLFGLQGAGGFQDREEEYYAEPGVTEAEPVATEDAN(de)STDSLK_
277	Glycosylation	IPI00378224	Thioredoxin domain-containing protein 15	Q6P6J9	LKIFIFNQTGIEA	_IFIFN(de)Q(de)TGIEAK_
311	Glycosylation	IPI00381178	Isoform 1 of Liver carboxylesterase 31;similar to Es31 protein isoform 9	Q63880-1;Q63880	ITKKNVNISYTVN	_NVN(de)ISYTVNDSFFPQRPQKLLANK_
767	Glycosylation	IPI00381303	Lysosomal alpha-mannosidase;mannosidase, alpha, class 2B, member 1 precursor	O09159;Q3TB95;Q3TBM1;Q3UGH3	RPTWTLNQTEPVA	_RDDYRPTWTLN(de)QTEPVAGNYYPVNTR_
497	Glycosylation	IPI00381303	Lysosomal alpha-mannosidase;mannosidase, alpha, class 2B, member 1 precursor	O09159;Q3TB95;Q3TBM1;Q3UGH3	SFCRELNISICPV	_ELN(de)ISICPVSQTSER_
192		IPI00381357	RIKEN cDNA 2310044H10;Isoform 2 of UPF0510 protein INM02;22 kDa protein	Q3TAS6-1;Q3TAS6;Q3TAS6-2	EDLELFNTSVQLR	_GSEVEDEDLELFN(de)TSVQLRPPSTAPGPETAAFIER_
201		IPI00381881	complement component 7		FNYEFYNSSWSYI	_VDNDFNYEFYN(de)SSWSYIK_
281	Glycosylation	IPI00387282	Arylacetamide deacetylase	Q99PG0	HLLQFVNWSSLLP	_AM(ox)LLNQHVPM(ox)ESSHLLQFVN(de)WSSLLPERYKK_
79	Glycosylation	IPI00387289	Carboxylesterase 3	Q8VCT4	PWSFVKNTTSYPP	_N(de)TTSYPPM(ox)CSQDAVGGQVLSELFTNRK_
297	Glycosylation	IPI00387318	Cell cycle control protein 50A;37 kDa protein	Q8VEK0	AGQYFLNITYNYP	_RDDLHPTLPAGQYFLN(de)ITYNYPVHSFDGR_
269	Glycosylation	IPI00396840	Isoform B of Endothelin-converting enzyme 1;Isoform D of Endothelin-converting enzyme 1;Isoform A of Endothelin-converting enzyme 1;Isoform C of Endothelin-converting enzyme 1;similar to Endothelin converting enzyme 1	Q4PZA2-1;Q4PZA2;B1AXF8;Q4PZA2-4;Q4PZA2-2;Q4PZA2-3;Q3TUZ3	SRDYYLNKTENEK	_DYYLN(de)KTENEK_
538	Glycosylation	IPI00396840	Isoform B of Endothelin-converting enzyme 1;Isoform D of Endothelin-converting enzyme 1;Isoform A of Endothelin-converting enzyme 1;Isoform C of Endothelin-converting enzyme 1;similar to Endothelin converting enzyme 1	Q4PZA2-1;Q4PZA2;B1AXF8;Q4PZA2-4;Q4PZA2-2;Q4PZA2-3;Q3TUZ3	NAMRFFNFSWRVT	_FFN(de)FSWR_
165	Glycosylation	IPI00396840	Isoform B of Endothelin-converting enzyme 1;Isoform D of Endothelin-converting enzyme 1;Isoform A of Endothelin-converting enzyme 1;Isoform C of Endothelin-converting enzyme 1	Q4PZA2-1;Q4PZA2;B1AXF8;Q4PZA2-4;Q4PZA2-2;Q4PZA2-3;Q3TUZ3	IKHLLENATASVS	_HLLEN(de)ATASVSEAERK_
315	Glycosylation	IPI00396840	Isoform B of Endothelin-converting enzyme 1;Isoform D of Endothelin-converting enzyme 1;Isoform A of Endothelin-converting enzyme 1;Isoform C of Endothelin-converting enzyme 1;similar to Endothelin converting enzyme 1	Q4PZA2-1;Q4PZA2;B1AXF8;Q4PZA2-4;Q4PZA2-2;Q4PZA2-3;Q3TUZ3	FETALANITIPQE	_LLGGGDEDAIRPQM(ox)QQILDFETALAN(de)ITIPQEK_
91	Glycosylation	IPI00515432	Tmem132e protein;Transmembrane protein 132E	B7ZN59;Q6IEE6	KELPVLNVSLGPF	_ELPVLN(de)VSLGPFSTSQVVAR_
169	Glycosylation	IPI00399503	Isoform Short of Macrosialin	P31996-2;P31996	ISVLNPNKTKVQG	_KAWGISVLNPN(de)KTK_
131		IPI00399958	calumenin isoform 2	Q3TL33;Q6XLQ8	SWDEYRNVTYGTY	_N(de)VTYGTYLDDPDPDDGFNYK_
1018	Glycosylation	IPI00403938	Isoform 1 of Tenascin;Isoform 2 of Tenascin;Isoform 3 of Tenascin;Isoform 4 of Tenascin;Isoform 5 of Tenascin	Q80YX1-1;Q80YX1;Q9WUU4;Q80YX1-2;Q80YX1-3;Q80YX1-4;Q80YX1-5;Q148T4;Q148T5;Q80YX0;Q8C9Z1	FDRYRLNYSLPTG	_LN(de)YSLPTGQSM(ox)EVQLPK_
141		IPI00405543	Novel anaphylotoxin-like domain containing protein;Putative uncharacterized protein	A2AS37;Q14BD9;Q8BWS8;Q505K6;Q8BWN9	VPIIYDNDSLFVQ	_LEIVPIIYDN(de)DSLFVQTDK_
56		IPI00405543	Novel anaphylotoxin-like domain containing protein;Putative uncharacterized protein	A2AS37;Q14BD9;Q8BWS8;Q505K6;Q8BWN9	RVGAPENVTVQAH	_VGAPEN(de)VTVQAHGHTEAFDTTVSVK_
761		IPI00405742	plexin B2;MKIAA0315 protein	B2RXS4;Q3UH76;Q8K2J5;Q99LF0;Q8CHG6	LQVTLYNCSFGRS	_LQVTLYN(de)CSFGR_
735		IPI00405742	plexin B2;MKIAA0315 protein	B2RXS4;Q3UH76;Q8K2J5;Q99LF0;Q8CHG6	KLSHDGNETLPLH	_LSHDGN(de)ETLPLHLYVK_
1053		IPI00405742	plexin B2;MKIAA0315 protein	B2RXS4;Q3UH76;Q8K2J5;Q99LF0;Q8CHG6	MEYVFYNDTKVVF	_VTVEGM(ox)EYVFYN(de)DTK_
1072		IPI00405742	plexin B2;MKIAA0315 protein	B2RXS4;Q3UH76;Q8K2J5;Q99LF0;Q8CHG6	EEPEAYNLTVLIR	_VVFLSPAVPEEPEAYN(de)LTVLIR_
819		IPI00876541	G protein-coupled receptor 116;MKIAA0758 protein	Q69ZZ8;Q8BZJ9	LLQQQSNQSSQFL	_LLQQQSN(de)QSSQFLHSVER_
189	Glycosylation	IPI00652358	Isoform 1 of Arylsulfatase B;Isoform 2 of Arylsulfatase B	P50429-1;P50429;P50429-2;B2RWQ7	APIESLNGTRCAL	_GFDTYFGYLLGSEDYYTHEACAPIESLN(de)GTR_
280	Glycosylation	IPI00652358	Isoform 1 of Arylsulfatase B;Isoform 2 of Arylsulfatase B	P50429-1;P50429;P50429-2;B2RWQ7	MDEAVGNVTKALK	_IYAGM(ox)VSLM(ox)DEAVGN(de)VTK_
1049		IPI00406603	Coagulation factor V;similar to Murine coagulation factor V	O88783;Q8C7H9	PDRRLLNHSLLLH	_LLN(de)HSLLLHK_
820		IPI00406603	Coagulation factor V;similar to Murine coagulation factor V	O88783;Q8C7H9	DENFVLNSSTEHR	_NLIGLDENFVLN(de)SSTEHR_
74	Glycosylation	IPI00406901	Putative uncharacterized protein;Platelet endothelial cell adhesion molecule;platelet/endothelial cell adhesion molecule 1 isoform 1;80 kDa protein;platelet/endothelial cell adhesion molecule 1 isoform 2;Platelet/endothelial cell adhesion molecule 1	B1ARB3;Q8CAW4;Q08481;B1ARB2;B1ARB1;Q3TES6;Q8K4F4;Q922E0;B1ARA9	DDAMVYNVTSREH	_VLFYKDDAM(ox)VYN(de)VTSR_
724		IPI00407222	Isoform 1 of Endoplasmic reticulum metallopeptidase 1	Q3UVK0-1;Q3UVK0;Q8K2F9	PHIPEINDTIRAH	_DSGIWIN(de)GFDYTGM(ox)SHVTPHIPEIN(de)DTIR_
272		IPI00889954	41 kDa protein;Haptoglobin	Q61646;Q3UBS3	CVVHYENSTVPEK	_CVVHYEN(de)STVPEKK_
164		IPI00889954	41 kDa protein;Haptoglobin	Q61646;Q3UBS3	AKNLFLNHSETAS	_NLFLN(de)HSETASAK_
280		IPI00889954	41 kDa protein;Haptoglobin	Q61646;Q3UBS3	TVPEKKNLTSPVG	_N(de)LTSPVGVQPILNEHTFCAGLTK_
198		IPI00889954	41 kDa protein;Haptoglobin	Q61646;Q3UBS3	KVVLHPNHSVVDI	_VVLHPN(de)HSVVDIGLIK_
392	Glycosylation	IPI00410796	Protein ITFG3;Protein	Q8C0Z1	LAVVIENGTSIDR	_KPILGHYKPDTLAVVIEN(de)GTSIDR_
1077	Glycosylation	IPI00411145	Isoform 1 of Low-density lipoprotein receptor-related protein 4;Isoform 2 of Low-density lipoprotein receptor-related protein 4	Q8VI56-1;Q8VI56;Q8VI56-2;Q8VI57	DVVVPINMTMKNT	_M(ox)VSLDIPYFADVVVPIN(de)M(ox)TM(ox)K_
293	Glycosylation	IPI00417181	UDP-glucuronosyltransferase 1-7C;UDP glycosyltransferase 1 family, polypeptide A10;UDP glycosyltransferase 1 family polypeptide A13;similar to UDP-glucuronosyltransferase 1A8;UDP-glucuronosyltransferase 1-9	Q6ZQM8;Q5FW80;Q6XL43;Q62452;A6H6W3	EFEAYVNASGEHG	_EFEAYVN(de)ASGEHGIVVFSLGSM(ox)VSEIPEKK_
160	Glycosylation	IPI00650038	Isoform 2 of Sortilin;Isoform 1 of Sortilin	Q6PHU5-2;Q6PHU5;A2AEF0;Q6PHU5-1	DITNLINNTFIRT	_DITNLIN(de)NTFIR_
394	Glycosylation	IPI00453492	Isoform 2 of Uncharacterized protein KIAA0319-like;Isoform 1 of Uncharacterized protein KIAA0319-like	Q8K135-2;Q8K135;Q8K135-1	HGEGYVNVTVKPE	_VTVDGQNAHGEGYVN(de)VTVKPEPR_
53	Glycosylation	IPI00453524	Cathepsin O	Q8BM88;Q4QQL3	NSFPHENSTAFYG	_YLNSFPHEN(de)STAFYGVNQFSYLFPEEFK_
663		IPI00458077	Neutral ceramidase	Q9JHE3;B7ZN55;B9EHG7	PKNSAENQTHQTF	_NSAEN(de)QTHQTFLTVEK_
474		IPI00473880	Igh protein;Igh protein;Igh protein;Igh protein;Igh protein;Igh protein;Igh protein;Igh protein;Igh protein;Igh protein;Igh protein;Igh protein;Igh protein;Igh protein;Igh protein;Igh protein;Igh protein;Igh protein;Putative uncharacterized protein;LOC6775	Q8VCX4;Q8K0F2;Q2KHS9;Q91WR1;Q99KA4;Q80ZI7;Q3KQK0;Q5HZY6;Q91Z07;Q58E61;Q6PDB8;Q99LA6;Q3SYJ4;Q8K172;Q5U472;Q8VEA0;P18532;Q5U413;Q566J7;Q52L51;Q4VAB6;Q32NZ5;Q2TAW9;Q2T9K9;Q91X92;Q8VCV5;Q91WT1;Q91WT3;Q8K0Z4;Q2NLC3;Q91XE1;P01878;Q3KQK2;Q99M22;Q7TMK4;Q91WP5;Q4V9Z4;Q05DT8;Q9DCD9	LSGKPTNVSVSVI	_LSGKPTN(de)VSVSVIM(ox)SEGDGICY_
166		IPI00459432	Lysosomal protein NCU-G1	Q9JHJ3	NSLDLANLSADFQ	_FSWNNITNSLDLAN(de)LSADFQGRPVDDPTGAFAN(de)GSLTFK_
185	Glycosylation	IPI00459432	Lysosomal protein NCU-G1	Q9JHJ3	PTGAFANGSLTFK	_FSWNNITNSLDLAN(de)LSADFQGRPVDDPTGAFAN(de)GSLTFK_
228	Glycosylation	IPI00459432	Lysosomal protein NCU-G1	Q9JHJ3	GASPRGNHSLFGL	_GN(de)HSLFGLEVATLGQGPDCPSVNER_
133	Glycosylation	IPI00459432	Lysosomal protein NCU-G1	Q9JHJ3	LEFDSTNASEGAQ	_LLEFDSTN(de)ASEGAQPPGKPYPPYSLAK_
353	Glycosylation	IPI00460063	Prenylcysteine oxidase;Protein	Q9CQF9;Q3TVT6;Q3UYP2;Q99JK4	FIKGELNSTLFSS	_GELN(de)STLFSSRPK_
2		IPI00461438	Elongation of very long chain fatty acids protein 6	Q920L5	_____MNMSVLTL	_M(ox)N(de)M(ox)SVLTLQEYEFEK_
1234	Glycosylation	IPI00463492	Transmembrane protein 2	Q5FWI3;Q8BS93	PSIISVNGTDFTF	_GDPSIISVN(de)GTDFTFR_
510		IPI00464256	Uncharacterized family 31 glucosidase KIAA1161	Q69ZQ1;B2RU42	VGYQSQNISCFFR	_VGYQSQN(de)ISCFFR_
418	Glycosylation	IPI00466371	Integrin alpha-1	Q3V3R4;Q05DI0;Q3V391;Q8BPT3	QIVIPHNTTFQTE	_ANQIVIPHN(de)TTFQTEPTK_
112	Glycosylation	IPI00466371	Integrin alpha-1;Putative uncharacterized protein	Q3V3R4;Q05DI0;Q3V391;Q8BPT3;Q3URV2	VTEIKENMTFGST	_EN(de)M(ox)TFGSTLVTNPK_
217	Glycosylation	IPI00466371	Integrin alpha-1;Putative uncharacterized protein	Q3V3R4;Q05DI0;Q3V391;Q8BPT3;Q3URV2	IVQYGANVTHEFN	_QTQVGIVQYGAN(de)VTHEFNLNK_
779	Glycosylation	IPI00466371	Integrin alpha-1	Q3V3R4;Q05DI0;Q3V391;Q8BPT3	RVTLDFNLTNPEN	_VTLDFN(de)LTN(de)PEN(de)GPVLDDALPNSVHGHIPFAK_
459	Glycosylation	IPI00466371	Integrin alpha-1	Q3V3R4;Q05DI0;Q3V391;Q8BPT3	AGQPRYNHTGQVV	_YN(de)HTGQ(de)VVIYK_
285	Glycosylation	IPI00876556	Mannan-binding lectin serine peptidase 2, isoform CRA_c;Isoform 1 of Mannan-binding lectin serine protease 2	B2KFQ8;Q91WP0-1;Q91WP0;Q3UEP7	ATDESGNHTGWKI	_VTITFATDESGN(de)HTGWK_
104	Glycosylation	IPI00467180	Translocon-associated protein subunit beta	Q9CPW5	LKAGYFNFTSATI	_AGYFN(de)FTSATITYLAQEDGPVVIGSTSAPGQGGILAQR_
2391	Glycosylation	IPI00467600	Stabilin-2	Q8R4U0;Q0PNF1	HHLTNVNVSFYDD	_DIEHHLTNVN(de)VSFYDDLVN(de)GTVLK_
2400	Glycosylation	IPI00467600	Stabilin-2	Q8R4U0;Q0PNF1	FYDDLVNGTVLKT	_DIEHHLTNVN(de)VSFYDDLVN(de)GTVLK_
58	Glycosylation	IPI00469123	Isoform 1 of Cell surface glycoprotein MUC18;Isoform 2 of Cell surface glycoprotein MUC18;16 kDa protein	Q8R2Y2-1;Q8R2Y2;Q8R2Y2-2	PSRASGNFSQVDW	_ASGN(de)FSQVDWFLIHK_
253		IPI00469218	Lysosomal membrane glycoprotein 1, isoform CRA_a;Lysosome-associated membrane glycoprotein 1	Q3TX84;Q8VH34;Q9DC13;P11438;Q3TA96;Q922T9	AFNISPNDTSSGS	_AFNISPN(de)DTSSGSCGINLVTLK_
178		IPI00469218	Lysosomal membrane glycoprotein 1, isoform CRA_a;Lysosome-associated membrane glycoprotein 1	Q3TX84;Q8VH34;Q9DC13;P11438;Q3TA96;Q922T9	AYLSSGNFSKEET	_DATIQAYLSSGN(de)FSK_
79		IPI00469218	Lysosomal membrane glycoprotein 1, isoform CRA_a;Lysosome-associated membrane glycoprotein 1	Q3TX84;Q8VH34;Q9DC13;P11438;Q3TA96;Q922T9	SSCGKENVSDPSL	_EN(de)VSDPSLTITFGR_
98		IPI00469218	Lysosomal membrane glycoprotein 1, isoform CRA_a;Lysosome-associated membrane glycoprotein 1	Q3TX84;Q8VH34;Q9DC13;P11438;Q3TA96;Q922T9	GYLLTLNFTKNTT	_GYLLTLN(de)FTK_
116		IPI00469218	Lysosomal membrane glycoprotein 1, isoform CRA_a;Lysosome-associated membrane glycoprotein 1	Q3TX84;Q8VH34;Q9DC13;P11438;Q3TA96;Q922T9	HMYFTYNLSDTEH	_YSVQHM(ox)YFTYN(de)LSDTEHFPN(de)AISK_
271	Glycosylation	IPI00469307	Alpha-2-macroglobulin receptor-associated protein;Putative uncharacterized protein	P55302;Q3TL96;Q52KI7;Q5D0B0;Q6PB52;Q6PEM5;Q6ZY49;Q8C252;Q8K295;Q3U8U9	DLAQSANFTEKEL	_VIDLWDLAQSAN(de)FTEKELESFREELK_
154		IPI00469387	GUGU alpha;Fetuin-B;fetuin beta isoform 2	Q6YJU2;Q8CB17;Q9QXC1;Q6YJU1	LYLPAYNCTLRPV	_VLYLPAYN(de)CTLRPVSK_
664		IPI00471080	Putative uncharacterized protein;69 kDa protein;Protein	Q8VC96;Q9DBD0	CLSNLQNKTTYKT	_DLLFSDDTECLSNLQN(de)K_
444		IPI00471081	Putative phospholipase B-like 1;similar to RIKEN cDNA 1100001H23 gene	Q8VCI0	FRRDQGNVTDMAS	_RDQGN(de)VTDM(ox)ASM(ox)K_
72	Glycosylation	IPI00471081	Putative phospholipase B-like 1;similar to RIKEN cDNA 1100001H23 gene	Q8VCI0	DAYGYYNDSIKTT	_N(de)GDAYGYYN(de)DSIK_
204	Glycosylation	IPI00471231	UDP-glucuronosyltransferase 2A3	Q8BWQ1	MSELTDNMTFTER	_HCGQLPIPLSYVPVVM(ox)SELTDN(de)M(ox)TFTER_
125	Glycosylation	IPI00845689	Putative uncharacterized protein;Putative uncharacterized protein	Q9CZL0;Q99KF1;Q3TFU8;Q3U7N8;Q6PDC2;Q8BLM5	QICLHSNSTKFSL	_FTFTSHTPGEHQICLHSN(de)STK_
183	Glycosylation	IPI00475209	Isoform 2 of Mannan-binding lectin serine protease 1;Isoform 1 of Mannan-binding lectin serine protease 1	P98064-2;P98064;Q8CIR9;P98064-1	YILHTDNRTCRVE	_FGYILHTDN(de)R_
412	Glycosylation	IPI00475209	Isoform 2 of Mannan-binding lectin serine protease 1;Isoform 1 of Mannan-binding lectin serine protease 1	P98064-2;P98064;Q8CIR9;P98064-1	YYKMLHNTTGVYT	_M(ox)LHN(de)TTGVYTCSAHGTWTNEVLK_
326		IPI00553503	carbohydrate sulfotransferase 13	Q9CT82	MDFLLFNYSAPSY	_M(ox)DFLLFN(de)YSAPSYLR_
155	Glycosylation	IPI00621027	Collagen alpha-2(VI) chain;99 kDa protein	Q02788	TDCALANMTQQIR	_RGTFTDCALAN(de)M(ox)TQQIR_
969		IPI00621027	Collagen alpha-2(VI) chain	Q02788	TDGVTGNDSLEES	_HAELSFVFLTDGVTGN(de)DSLEESVHSM(ox)R_
912	Glycosylation	IPI00621027	Collagen alpha-2(VI) chain	Q02788	AFPLTYNVTTIHE	_M(ox)ALLQYGSQNQQQVAFPLTYN(de)VTTIHEALER_
800	Glycosylation	IPI00621027	Collagen alpha-2(VI) chain;99 kDa protein	Q02788	KPQQVRNMTLFSD	_N(de)M(ox)TLFSDLVAEK_
2327		IPI00623114	FAT tumor suppressor homolog 1;Fat 1 cadherin	A7ISQ0;Q9QXA3	SYQLIGNHSKSHD	_GISYQLIGN(de)HSK_
480	Glycosylation	IPI00624345	GPI mannosyltransferase 3	Q9JJQ0	QQEFHSNASLPTH	_WLQQEFHSN(de)ASLPTHLVTFNVLEK_
568	Glycosylation	IPI00624663	Alpha-2-macroglobulin	Q61838	CFANKVNLSFPSA	_VN(de)LSFPSAQSLPASDTHLK_
1385	Glycosylation	IPI00624663	Alpha-2-macroglobulin	Q61838	TFQIRINVSYTGE	_IN(de)VSYTGERPSSN(de)M(ox)VIVDVK_
1443	Glycosylation	IPI00624663	Alpha-2-macroglobulin	Q61838	YIEKLTNQTLGFS	_LTN(de)QTLGFSFAVEQDIPVK_
157	Glycosylation	IPI00624663	Alpha-2-macroglobulin	Q61838	ISFRPLNETFPVV	_VVSVDISFRPLN(de)ETFPVVYIETPKR_
320		IPI00626950	Putative uncharacterized protein;Ectonucleoside triphosphate diphosphohydrolase 1;Protein	Q8CDV7;Q921Q6;P55772;Q544U5;Q8CEB1	GYEKVVNVSELYG	_VVN(de)VSELYGTPCTK_
58		IPI00626977	Envelope protein;Envelope polyprotein;Envelope glycoprotein 52;Truncated envelope polyprotein;Surface envelope protein (Fragment)	Q61877;Q811N6;B8YPG2;B8YPG3;Q811N2;Q5MNJ6;Q61524;Q811N5	MTGQTANATSLLG	_VTNLM(ox)TGQTAN(de)ATSLLGTM(ox)TDAFPK_
181		IPI00944194	FK506 binding protein 10 isoform 1;FK506 binding protein 10 isoform 2;FK506 binding protein 10	A2A4I0;Q3UNJ3;A2A4H9	FVRYHYNGTLLDG	_YHYN(de)GTLLDGTAFDNSYSR_
307		IPI00653675	complement component 1, s subcomponent;76 kDa protein	Q8CG14;Q14DT6;Q3T9K7	AKKITANSTWQPD	_KITAN(de)STWQ(de)PDKAK_
104	Glycosylation	IPI00915472	Isoform 3 of Carcinoembryonic antigen-related cell adhesion molecule 1;carcinoembryonic antigen-related cell adhesion molecule 1 isoform 3;carcinoembryonic antigen-related cell adhesion molecule 1 isoform 4;Putative uncharacterized protein CEACAM1a-2C1;Iso	P31809-3;P31809;Q3LFS9;Q61350;Q3LFS8;Q3LFS6;P31809-1;Q925P3;P31809-2;Q03679;Q3LFS7;Q61351;Q61352;Q3LFS5	REIIYSNGSLLFQ	_EIIYSN(de)GSLLFQM(ox)ITM(ox)K_
153		IPI00915472	Isoform 3 of Carcinoembryonic antigen-related cell adhesion molecule 1;carcinoembryonic antigen-related cell adhesion molecule 1 isoform 3;carcinoembryonic antigen-related cell adhesion molecule 1 isoform 4;Putative uncharacterized protein CEACAM1a-2C1	P31809-3;P31809;Q3LFS9;Q61350;Q3LFS8;Q3LFS6	PFLQVTNTTVKEL	_FHVHQPVTQPFLQVTN(de)TTVK_
89	Glycosylation	IPI00915472	Isoform 3 of Carcinoembryonic antigen-related cell adhesion molecule 1;carcinoembryonic antigen-related cell adhesion molecule 1 isoform 3;carcinoembryonic antigen-related cell adhesion molecule 1 isoform 4;Putative uncharacterized protein CEACAM1a-2C1;Iso	P31809-3;P31809;Q3LFS9;Q61350;Q3LFS8;Q3LFS6;P31809-1;Q925P3;P31809-2;Q03679;Q3LFS7;Q61351;Q61352;Q3LFS5	VPNSNMNFTGQAY	_FVPN(de)SNM(ox)N(de)FTGQAYSGR_
195		IPI00915472	Isoform 3 of Carcinoembryonic antigen-related cell adhesion molecule 1;carcinoembryonic antigen-related cell adhesion molecule 1 isoform 3;carcinoembryonic antigen-related cell adhesion molecule 1 isoform 4;Putative uncharacterized protein CEACAM1a-2C1;Iso	P31809-3;P31809;Q3LFS9;Q61350;Q3LFS8;Q3LFS6;P31809-1;Q925P3;P31809-2;Q03679;Q3LFS7;Q61351;Q61352;Q3LFS5;Q61354;Q99232	RMTLSQNNSILRI	_M(ox)TLSQN(de)N(de)SILR_
3860		IPI00666034	apolipoprotein B precursor	Q3UH74;Q61314;Q61318	MASPLYNVTWSAG	_AGM(ox)ASPLYN(de)VTWSAGWK_
2126		IPI00666034	apolipoprotein B precursor	Q3UH74;Q61314;Q61318	QIHHYLNASDWER	_LPQQIHHYLN(de)ASDWER_
292	Glycosylation	IPI00675799	Collagen alpha-5(VI) chain	A6H584	LQNFLENVTSSVD	_DLQNFLEN(de)VTSSVDVK_
867		IPI00675799	Collagen alpha-5(VI) chain	A6H584	EQESMMNLTIHLV	_EQESM(ox)M(ox)N(de)LTIHLVK_
254	Glycosylation	IPI00750091	Ceroid-lipofuscinosis neuronal protein 5 homolog	Q3UMW8;B2RUP8	EPIYLGNETSIFG	_IFLYSGEPIYLGN(de)ETSIFGPK_
276	Glycosylation	IPI00754386	ERO1-like protein alpha	Q8R180;Q3TXL0;Q4FJZ3;Q4FK57	EKKWGHNVTEFQQ	_WGHN(de)VTEFQQR_
1133		IPI00788494	mannose receptor, C type 2 precursor;Isoform 1 of C-type mannose receptor 2	A2AAB0;Q14AX9;Q64449-1;Q64449	AELSYLNHTFRLL	_GTDPSLSPSPAATPPAPGAELSYLN(de)HTFR_
269	Glycosylation	IPI00762897	UDP-glucose:glycoprotein glucosyltransferase 1	Q6P5E4;B0LAE5;Q8BWM7	VKGTEVNATVIGE	_GTEVN(de)ATVIGESDPIDEVQGFLFGK_
390		IPI00831484	predicted gene 5158		RFHSDLNISESLI	_FHSDLN(de)ISESLIPAVIEK_
3547		IPI00849818	similar to maltase-glucoamylase;Maltase-glucoamylase	B5THE2;Q6XK23;Q6XK24	LARFSVNQTTLLT	_FSVN(de)QTTLLTHEK_
437		IPI00849818	similar to maltase-glucoamylase;Maltase-glucoamylase	B5THE2;Q6XK23;Q6XK24	LDPAISNNSFSSN	_LVIILDPAISN(de)NSFSSNPYGPYDR_
3095		IPI00849818	similar to maltase-glucoamylase;Maltase-glucoamylase	B5THE2;Q6XK23;Q6XK24	DPAISGNETEPYP	_VILILDPAISGN(de)ETEPYPAFTR_
2201		IPI00849818	similar to maltase-glucoamylase		DPAISGNETQPYP	_VILILDPAISGN(de)ETQPYPAFTR_
234		IPI00850413	Isoform 1 of GPI inositol-deacylase	Q3UUQ7-1;Q3UUQ7	LNARHINLTTLSV	_HIN(de)LTTLSVAGGFR_
558	Glycosylation	IPI00850413	Isoform 1 of GPI inositol-deacylase	Q3UUQ7-1;Q3UUQ7	HVAQPENDSHVAL	_LHVAQPEN(de)DSHVALLK_
590	Glycosylation	IPI00856221	Sterol regulatory element-binding protein cleavage-activating protein	Q6GQT6	APKLPENQTLPGE	_LPEN(de)QTLPGELPEHAGPAEGVHDSR_
184		IPI00875339	hypothetical protein LOC238395		LNDYVSNQTQGMI	_LLNDYVSN(de)QTQGM(ox)IK_
116		IPI00896605	complement factor I precursor	B2RWX8	AAEGKFNVSLIYG	_FN(de)VSLIYGR_
